# Supplementary material for: Cohort study of high maternal body mass index and the risk of adverse pregnancy and delivery outcomes in Scotland
Source: PubMed Central journal article supplement (PMC7045241; doi:10.1136/bmjopen-2018-026168), 2020-02-20
Supplement: bmjopen-2018-026168.draft_revisions.pdf [file bmjopen-2018-026168.draft_revisions.pdf]

# BMJ Open

BMJ Open is committed to open peer review. As part of this commitment we make the peer review history of every article we publish publicly available.

When an article is published we post the peer reviewers' comments and the authors' responses online. We also post the versions of the paper that were used during peer review. These are the versions that the peer review comments apply to.

The versions of the paper that follow are the versions that were submitted during the peer review process. They are not the versions of record or the final published versions. They should not be cited or distributed as the published version of this manuscript.

BMJ Open is an open access journal and the full, final, typeset and author-corrected version of record of the manuscript is available on our site with no access controls, subscription charges or pay-per-view fees (<http://bmjopen.bmj.com>).

If you have any questions on BMJ Open's open peer review process please email [info.bmjopen@bmj.com](mailto:info.bmjopen@bmj.com)

# BMJ Open

## High maternal Body Mass Index and the risk of adverse pregnancy, delivery and neonatal outcomes

|                               |                                                                                                                                                                                                                                                                                                                                                    |
|-------------------------------|----------------------------------------------------------------------------------------------------------------------------------------------------------------------------------------------------------------------------------------------------------------------------------------------------------------------------------------------------|
| Journal:                      | <i>BMJ Open</i>                                                                                                                                                                                                                                                                                                                                    |
| Manuscript ID                 | bmjopen-2018-026168                                                                                                                                                                                                                                                                                                                                |
| Article Type:                 | Research                                                                                                                                                                                                                                                                                                                                           |
| Date Submitted by the Author: | 22-Aug-2018                                                                                                                                                                                                                                                                                                                                        |
| Complete List of Authors:     | Doi, Lawrence; University of Edinburgh, Scottish Collaboration for Public Health Research and Policy, School of Health in Social Science<br>Williams, Andrew James; University of Exeter<br>Marryat, Louise; University of Edinburgh, SCPHRP<br>Frank, John; University of Edinburgh, Scottish Collaboration for Public Health Research and Policy |
| Keywords:                     | OBSTETRICS, EPIDEMIOLOGY, PUBLIC HEALTH                                                                                                                                                                                                                                                                                                            |
|                               |                                                                                                                                                                                                                                                                                                                                                    |

SCHOLARONE™  
Manuscripts

Peer Review Only

## High maternal Body Mass Index and the risk of adverse pregnancy, delivery and neonatal outcomes

Lawrence Doi<sup>1\*</sup>, Andrew James Williams<sup>2</sup>, Louise Marryat<sup>3</sup>, John Frank<sup>3,4</sup>

\*Correspondence: [larry.doi@ed.ac.uk](mailto:larry.doi@ed.ac.uk)

<sup>1</sup>Scottish Collaboration for Public Health Research and Policy, School of Health in Social Science, Doorway 6, Old Medical School, Teviot Place, University of Edinburgh, EH8 9AG, UK

<sup>2</sup>European Centre for Environment and Human Health, University of Exeter Medical School, Knowledge Spa, Royal Cornwall Hospital, Truro, Cornwall TR1 3HD, UK.

<sup>3</sup>Farr Institute at Scotland, University of Edinburgh, Nine, Edinburgh BioQuarter, 9 Little France Road, Edinburgh EH16 4UX, UK.

<sup>4</sup>Usher Institute of Population Health Sciences and Informatics, Doorway 1, Old Medical School, Teviot Place, University of Edinburgh, EH8 9AG, UK

## Abstract

**Objective:** To examine the independent impact of high maternal weight status on pregnancy, delivery and neonatal outcomes.

**Setting:** Scotland

**Participants:** Data from 345,363 deliveries in Scotland between 2008 and 2015 were used. Women with overweight and obesity were compared with women with normal weight. Independent associations between maternal body mass index and pregnancy and neonatal outcomes were evaluated in a staged fashion, according to the clinical timelines by which pregnancy, delivery and neonatal outcomes occur.

**Outcome measures:** Maternal or pregnancy complications, delivery complications and neonatal outcomes.

**Results:** In the multivariable models controlling for potential covariates, we found that compared with women with normal weight, the odds of the following outcomes were significantly increased for women with overweight and obesity [overweight adjusted odds ratio; 95% confidence interval, followed by the same for women with obesity]: gestational hypertension [1.61; 1.52-1.70], [2.64; 2.50-2.80]; gestational diabetes [2.34; 2.25-2.65], [8.69; 8.90-9.34]; pre-eclampsia [1.42; 1.32-1.54], [2.11; 1.95-2.28]; labour induction [1.26; 1.24-1.36], [1.71; 1.67-1.75]; and emergency caesarean section [1.78; 1.72-1.86], [3.15; 3.03-3.28].

**Conclusions:** Women with overweight and obesity in Scotland are at greater risk of adverse pregnancy, delivery and neonatal outcomes. The risk of these conditions increases steadily with increasing body mass index. Health professionals should be empowered to deliver promising dietary and lifestyle interventions to women at risk

1  
2  
3 of overweight and obesity prior to conception, and control excessive weight gain in  
4 pregnancy.  
5  
6  
7  
8  
9  
10

#### 11 **Strengths and limitations of this study**

- 14 • This study used a large, retrospective, national database covering all major  
15 maternal and neonatal outcomes in Scotland.
- 18 • The staged analysis approach employed ensured an estimate of the  
20 independent impact of high maternal-weight status on each outcome.
- 23 • All women with BMI of 30 or more were considered as having obesity and it  
24 is likely that differentiating morbid obesity or obesity class II and III from  
26 women with obesity would have generated more precise estimates.
- 29 • Although the analysis was restricted to only single births, the nature of the  
31 analysis meant that women who may have had more than one delivery  
32 during the study period contributed data on more than one birth, so not all  
33 outcomes were strictly independent.  
34  
35  
36  
37  
38  
39  
40  
41  
42  
43  
44  
45  
46  
47  
48  
49  
50  
51  
52  
53  
54  
55  
56  
57  
58  
59  
60

## Introduction

The increasing global prevalence of overweight and obesity makes it probable that a growing number of women with high body mass index (BMI) are becoming pregnant. High maternal BMI during pregnancy has adverse health implications for women (1,2,3) and predisposes the unborn child to adverse outcomes, including neonatal deaths, stillbirth, and admission to a neonatal unit (4,5,6). Wider service and economic consequences can also be seen (7,8,9): there are indirect burdens of illness and associated costs, in that women with high BMI who experience adverse birth outcomes such as neonatal death or stillbirth may require support from family and friends as well as bereavement support services within the community. There are also substantial healthcare cost implications for infants who may require neonatal intensive care unit admission.

Maternal weight status is currently high in Scotland: a recent study reported that 31.5% of mothers were overweight and a further 23.6% were affected by obesity (10). However, no recent study in Scotland has investigated the effect of high maternal BMI on pregnancy and neonatal outcomes. The aim of this study was to examine the independent associations between high maternal BMI during pregnancy and perinatal risks, including adverse neonatal outcomes. Understanding of these associations can highlight areas where prevention strategies could be targeted.

## Methods

### *Study population and data sources*

1  
2  
3 This retrospective study used data from 362,102 women of which outcome data  
4 were available for 345,363 deliveries in Scotland between January 2008 and  
5  
6  
7 December 2015. The women and infants were identified within the Scottish Morbidity  
8  
9  
10 Record (SMR) 01 and 02 and Scottish Birth Record (SBR). SMR01 is generated for  
11 patients receiving inpatient or day care in the General or Acute specialties, whilst  
12  
13  
14 SMR02 is generated for patients receiving inpatient or day care in the Obstetric  
15  
16  
17 Specialties. The SBR records all of a baby's neonatal care in Scotland. The outcome  
18  
19  
20 variables are recorded in these registries according the World Health Organisation's  
21  
22  
23 International Classification of Diseases, Tenth Revision (ICD-10). Further description  
24  
25  
26 of the content of these registries is available (11). The study was designed as a  
27  
28  
29 clinical audit so did not require approval from a Research Ethics Committee.  
30  
31  
32 However, approval was obtained from the national Electronic Data Research and  
33  
34  
35 Innovation Service to use the anonymised data collected by these registries.  
36  
37  
38

### 31 ***Patient and public involvement***

32  
33  
34 Patients were not involved in the design, analysis and interpretation of this study.  
35  
36

### 37 ***Exposure variable***

38  
39  
40 More than 80% of pregnant women in Scotland present themselves for antenatal  
41  
42  
43 care during the first trimester of their pregnancy. Height and weight are measured  
44  
45  
46 by the midwife at the first antenatal visit, typically before 12 weeks of pregnancy.  
47  
48  
49 Body mass index was calculated using the formula weight (kg)/height (m<sup>2</sup>). BMI  
50  
51  
52 completeness was 69% in 2008 but this increased gradually to 87% in 2011 when  
53  
54  
55 recording of weight and height became mandatory. By 2015 BMI completeness was  
56  
57  
58 98%. Women were categorised into three BMI groups as described in Table 1.  
59  
60

Table 1. BMI definitions used

| Variable               | Category   | BMI Definition                                                                                                                              |
|------------------------|------------|---------------------------------------------------------------------------------------------------------------------------------------------|
| Maternal weight status | Normal     | <25 kg/m <sup>2</sup> (for women over 19);<br>>0.4th centile to <91st centile<br>(for girls aged 15 - 19 years old)                         |
|                        | Overweight | ≥25 kg/m <sup>2</sup> to <30 kg/m <sup>2</sup> (for women over 19);<br>≥91st centile to <98th centile<br>(for girls aged 15 - 19 years old) |
|                        | Obesity    | ≥30 kg/m <sup>2</sup> (for women over 19);<br>≥98th centile (for girls aged 15 - 19 years old)                                              |

\* Age and gender standardised using UK1990 growth reference values

### Outcomes

Outcome measures included were maternal or pregnancy complications such as gestational diabetes, gestational hypertension, pre-eclampsia, placenta praevia, placental abruption and postpartum haemorrhage. Delivery complications studied were induction of labour, caesarean delivery (includes elective and emergency caesarean sections), pre-term delivery (defined as less than 37 weeks of gestation) and post-term delivery (more than 42 weeks of gestation).

Neonatal outcomes studied were: low Apgar score (less than "7" at 5 minutes), stillbirth, congenital anomalies, neonatal intensive care unit (NICU) admission, neonatal death, small for gestational age (SGA), and large for gestational age (LGA). SGA were infants with birthweight of ≤10<sup>th</sup> percentile for gestational age according to UK1990 growth reference curve (12,13), and those with LGA were infants with birth weight ≥90<sup>th</sup> percentile.

### Covariates



Maternal age at delivery, parity, smoking during pregnancy and Scottish Index of Multiple Deprivation for the datazone of the mother's residence at birth, were considered as potentially confounding variables and were included as covariates in the adjusted analyses. Table 2 describes the covariates used in this study by maternal weight status among singleton pregnancies (a pregnancy with one fetus as opposed to twins or multiples). The data in Table 2 show the numbers of women who had data on age, parity, deprivation and maternal smoking. This means that the total number of women is slightly larger than the number in stage one of our analysis, as there were women missing hypertension, diabetes or pre-eclampsia data.

Table 2. Maternal characteristics among women with normal weight, overweight and obesity<sup>+</sup> (singleton pregnancies)

|                                      | <b>Normal*</b><br><b>N = 184,186</b> |          | <b>Overweight*</b><br><b>N = 100,844</b> |          | <b>Obesity*</b><br><b>N = 77,072</b> |          |
|--------------------------------------|--------------------------------------|----------|------------------------------------------|----------|--------------------------------------|----------|
|                                      | <b>N</b>                             | <b>%</b> | <b>N</b>                                 | <b>%</b> | <b>N</b>                             | <b>%</b> |
| <b>Maternal age (y)</b>              |                                      |          |                                          |          |                                      |          |
| 15-19                                | 12,887                               | 7.0      | 3,737                                    | 3.7      | 3,586                                | 4.7      |
| 20-24                                | 34,067                               | 18.5     | 16,621                                   | 16.5     | 13,638                               | 17.7     |
| 25-29                                | 50,599                               | 27.5     | 27,648                                   | 27.4     | 22,055                               | 28.6     |
| 30-34                                | 53,604                               | 29.1     | 30,389                                   | 30.1     | 21,786                               | 28.3     |
| 35-39                                | 27,339                               | 14.8     | 18,108                                   | 18.0     | 12,730                               | 16.5     |
| 40-44                                | 5,433                                | 3.0      | 4,105                                    | 4.1      | 3,131                                | 4.1      |
| 44-49                                | 257                                  | 0.1      | 191                                      | 0.2      | 146                                  | 0.2      |
| <b>Parity</b>                        |                                      |          |                                          |          |                                      |          |
| 1                                    | 85,617                               | 46.5     | 41,205                                   | 40.9     | 29,420                               | 38.2     |
| 2                                    | 64,905                               | 35.2     | 37,016                                   | 36.7     | 27,935                               | 36.3     |
| 3+                                   | 33,664                               | 18.3     | 22,623                                   | 22.4     | 19,717                               | 25.6     |
| <b>Deprivation</b>                   |                                      |          |                                          |          |                                      |          |
| Q1 (Least deprived)                  | 36,229                               | 19.7     | 17,964                                   | 17.8     | 10,675                               | 13.9     |
| Q2                                   | 34,098                               | 18.5     | 18,343                                   | 18.2     | 13,223                               | 17.2     |
| Q3                                   | 37,016                               | 20.1     | 20,286                                   | 20.1     | 15,495                               | 20.1     |
| Q4                                   | 38,945                               | 21.1     | 22,236                                   | 22.1     | 18,449                               | 23.9     |
| Q5 (Most deprived)                   | 37,898                               | 20.6     | 22,015                                   | 21.8     | 19,230                               | 25.0     |
| <b>Maternal smoking in pregnancy</b> |                                      |          |                                          |          |                                      |          |
| No                                   | 148,334                              | 80.5     | 83,231                                   | 82.5     | 62,303                               | 80.8     |
| Yes                                  | 35,852                               | 19.5     | 17,613                                   | 17.5     | 14,769                               | 19.2     |

\*Maternal weight status at first antenatal visit

<sup>+</sup>Figures show women who had complete data on age, parity, deprivation and maternal smoking

## **Data analysis**

Using Stata 14 (14), logistic regression was used to calculate odds ratios (ORs). BMI groups with overweight and obesity were compared with the normal BMI group (the reference population). A confidence interval (CI) of 95% was produced for all ORs.

The analysis of the outcomes proceeded in a staged fashion according to the clinical timelines by which pregnancy, delivery and neonatal outcomes occur.

Firstly, all conditions occurring during pregnancy such as gestational hypertension, gestational diabetes and pre-eclampsia, which may also be a risk factor for later outcomes, were compared with a 'healthy' group who did not have any of these conditions. The second stage of the analysis considered only the group with none of the stage one conditions. Placental abruption and placenta praevia were considered within this stage because the risk of both conditions is associated with one or more of the stage one conditions. Therefore, by limiting the dataset to those without any of the stage one conditions, a better estimate of the *independent* impact of maternal weight status is established. This approach means the sample size reduces steadily as one moves through the process. The stages used for the analyses are outlined in Figure 1. In the final stage there are two sub-stages because postpartum haemorrhage is a maternal outcome and we wanted to treat this outcome independent of NICU admission, congenital anomaly and neonatal death.

<Figure 1>

## **Results**

1  
2  
3 Within our study population 50.9% of pregnant women were categorised as normal  
4 weight, 27.8% overweight and 21.3% were affected by obesity. The socio-  
5 demographic characteristics of the women in the three BMI categories are presented  
6 in Table 2. A comparison between the women in the various BMI categories shows  
7 that the women who were affected by overweight and obesity were slightly older and  
8 more often multiparous. Maternal smoking was slightly higher among women with  
9 normal weight than in women with overweight and obesity. Among the normal BMI  
10 group 20.6% were from the most deprived and 19.7% were from the least deprived  
11 group. However, the difference in social deprivation was more marked within women  
12 with obesity. Among this group, 25.0% were from the most deprived group whilst  
13 13.9% were from the least deprived group.

14  
15  
16  
17  
18  
19  
20  
21  
22  
23  
24  
25  
26  
27 Table 3 shows odd ratios for pregnancy and delivery complications, as well as  
28 neonatal outcomes, among women with overweight and obesity, and with singleton  
29 births. The three conditions occurring during pregnancy increased steadily with  
30 increasing BMI. For example, compared to the normal BMI group, the risk of  
31 gestational diabetes was 2.34 (95% CI: 2.25-2.65) but among the women with  
32 obesity the risk was increased almost 9-fold (95% CI: 8.09-9.34). Relative to women  
33 with normal weight, the adjusted OR of pre-eclampsia for women with overweight  
34 was 1.42 (95% CI: 1.32-1.54) and 2.11 (95% CI: 1.95-2.28) for women with obesity.  
35  
36  
37  
38  
39  
40  
41  
42  
43  
44  
45  
46  
47  
48  
49  
50  
51  
52  
53  
54  
55  
56  
57  
58  
59  
60

Table 3. Pregnancy and delivery complications and neonatal outcomes among women with normal, overweight and obesity (singletons)

|                                                          | Sample  | Controls<br>N (%) | Overweight N<br>N (%) | Adjusted OR*<br>(95% CI) | Obesity<br>N (%) | Adjusted OR*<br>(95% CI) |
|----------------------------------------------------------|---------|-------------------|-----------------------|--------------------------|------------------|--------------------------|
| <b>Stage 1: Conditions occurring during pregnancy</b>    |         |                   |                       |                          |                  |                          |
| Gestational hypertension                                 | 345,363 | 177,977 (51.5)    | 96,384 (27.9)         | 1.61 (1.52, 1.70)        | 71,002 (20.6)    | 2.64 (2.50, 2.80)        |
| Gestational diabetes                                     | 343,778 | 176,268 (51.3)    | 95,523 (27.8)         | 2.34 (2.25, 2.65)        | 71,987 (20.9)    | 8.69 (8.09, 9.34)        |
| Pre-eclampsia                                            | 341,835 | 176,866 (51.7)    | 95,295 (27.9)         | 1.42 (1.32, 1.54)        | 69,674 (20.4)    | 2.11 (1.95, 2.28)        |
| <b>Stage 2: Conditions affecting delivery</b>            |         |                   |                       |                          |                  |                          |
| Placenta praevia                                         | 337,325 | 174,973 (51.9)    | 93,997 (27.9)         | 1.18 (1.01, 1.39)        | 68,355 (20.3)    | 0.90 (0.74, 1.09)        |
| Placental abruption <sup>a</sup>                         | 337,158 | 174,930 (51.9)    | 93,892 (27.9)         | 0.86 (0.71, 1.04)        | 68,336 (20.3)    | 0.91 (0.74, 1.13)        |
| <b>Stage 3: Delivery</b>                                 |         |                   |                       |                          |                  |                          |
| Induction of labour                                      | 237,216 | 131,077 (55.3)    | 63,992 (27.0)         | 1.26 (1.24, 1.29)        | 42,147 (17.8)    | 1.71 (1.67, 1.75)        |
| Caesarean section                                        | 216,243 | 120,687 (55.8)    | 58,361 (27.0)         | 1.33 (1.29, 1.36)        | 37,195 (17.2)    | 1.84 (1.79, 1.90)        |
| Emergency caesarean section                              | 193,240 | 108,075 (55.9)    | 51,924 (26.9)         | 1.78 (1.72, 1.86)        | 33,241 (17.2)    | 3.15 (3.03, 3.28)        |
| <b>Stage 4: Birth outcome</b>                            |         |                   |                       |                          |                  |                          |
| Apgar score                                              | 175,492 | 101,091 (57.6)    | 46,480 (26.5)         | 0.97 (0.94, 0.99)        | 27,921 (15.9)    | 0.92 (0.89, 0.96)        |
| Stillbirth <sup>b</sup>                                  | 145,927 | 83,787 (57.4)     | 38,720 (26.5)         | 1.24 (0.94, 1.64)        | 23,420 (16.1)    | 2.09 (1.58, 2.76)        |
| <b>Stage 5: Term and size</b>                            |         |                   |                       |                          |                  |                          |
| Small for gestational age                                | 94,599  | 56,604 (59.8)     | 24,218 (25.6)         | 0.81 (0.77, 0.86)        | 13,777 (14.6)    | 0.74 (0.69, 0.79)        |
| Preterm                                                  | 90,697  | 53,780 (59.3)     | 23,447 (25.9)         | 0.97 (0.90, 1.04)        | 13,470 (14.9)    | 1.04 (0.96, 1.13)        |
| Small for gestational age and preterm <sup>c</sup>       | 86,078  | 51,040 (59.3)     | 22,291 (25.9)         | 0.67 (0.46, 0.98)        | 12,747 (14.8)    | 0.53 (0.31, 0.90)        |
| Postterm <sup>d</sup>                                    | 85,950  | 50,947 (59.3)     | 22,265 (25.9)         | 0.83 (0.37, 1.87)        | 12,738 (14.8)    | 1.27 (0.54, 3.00)        |
| Large for gestational age                                | 129,770 | 73,822 (56.9)     | 34,865 (26.9)         | 1.23 (1.20, 1.26)        | 21,083 (16.3)    | 1.44 (1.40, 1.49)        |
| <b>Stage 6: Postnatal outcomes (infant and maternal)</b> |         |                   |                       |                          |                  |                          |
| NICU                                                     | 85,421  | 50,651 (59.3)     | 22,117 (25.9)         | 1.08 (0.99, 1.19)        | 12,653 (14.8)    | 1.31 (1.18, 1.45)        |
| Neonatal death <sup>e</sup>                              | 82,682  | 49,123 (59.4)     | 21,401 (25.9)         | 0.68 (0.22, 2.12)        | 12,158 (14.7)    | 0.29 (0.04, 2.21)        |
| Congenital anomaly <sup>f</sup>                          | 46,441  | 27,738 (59.7)     | 11,932 (25.7)         | 1.37 (0.95, 1.96)        | 6,771 (14.6)     | 1.25 (0.80, 1.94)        |
| Postpartum haemorrhage                                   | 85,913  | 50,925 (59.3)     | 22,257 (25.9)         | 0.99 (0.94, 1.03)        | 12,731 (14.8)    | 1.04 (0.98, 1.10)        |

OR = Odd Ratio; CI = Confidence Interval; NICU = Neonatal Intensive Care Unit

\*Adjusted for maternal age, parity, deprivation and smoking in pregnancy

<sup>a</sup>There were no placental abruptions among mothers aged 45-49 years, so 531 observations were dropped

<sup>b</sup>There were no stillbirths to mothers aged 45-49 years, so 72 observations were dropped

<sup>c</sup>There were no preterm and small for gestation age babies born to mothers aged 45-49 years, so 36 observations were dropped

<sup>d</sup>There were no post-term babies born to mothers aged 45-49 years, so 36 observations were dropped

<sup>e</sup>There were no neonatal deaths among births from mothers aged 45-49 years, so 35 observations were dropped

<sup>f</sup>There were no congenital anomalies among births from mothers aged 45-49 years, so 16 observations were dropped

1  
2  
3 Regarding conditions affecting delivery, the risk of placenta praevia was slightly  
4 increased among women with overweight as compared with normal weight women  
5 (OR 1.18, 95% CI: 1.01-1.39). However, among women with obesity, the OR was not  
6 significant, likely due to reduced statistical power for this uncommon outcome. The  
7 odds of experiencing placental abruption were not significantly different among the  
8 different BMI categories.  
9  
10  
11  
12  
13  
14

15  
16 The chance of induction of labour and caesarean section, either elective or  
17 emergency increased with increasing BMI. Women with overweight had odds of 1.33  
18 (95% CI: 1.29-1.36) higher for having an elective caesarean section and higher odds  
19 (OR 1.78, 95% CI: 1.72-1.86) for undergoing emergency caesarean section  
20 compared with normal weight women. The corresponding ORs for women with  
21 obesity were 1.84 (95% CI: 1.79-1.90) and 3.15 (95% CI: 3.03-3.28).  
22  
23  
24  
25  
26  
27  
28  
29

30 In terms of birth outcomes, the risk of stillbirth was not significantly different for  
31 women with overweight relative to normal weight women. However, there was about  
32 2-fold increased risk among women with obesity. Being with overweight (OR 0.97,  
33 95% CI: 0.94-0.99) or obesity (OR 0.92, 95% CI: 0.89-0.96) significantly decreased  
34 the risk of low Apgar score, likely because women with obesity and overweight may  
35 receive increased monitoring, which means issues are identified and managed  
36 earlier to reduce any fetal distress in labour.  
37  
38  
39  
40  
41  
42  
43  
44  
45  
46

47 In contrast with the normal BMI group, births to women with overweight and obesity  
48 were associated with decreased risk of small-for-gestational age and pre-term  
49 delivery, ORs 0.67 (95% CI: 0.46-0.98) and 0.53 (95% CI: 0.31-0.90) respectively.  
50  
51  
52  
53  
54 However, the prevalence of large-for-gestational age increased among women with  
55  
56  
57  
58  
59  
60

1  
2  
3 overweight, OR of 1.23 (95%CI: 1.20-1.26) and obesity, OR 1.44 (95% CI: 1.40-  
4  
5 1.49) compared with women with normal weight.  
6  
7

8  
9 There were no statistically significant differences in ORs across the three BMI  
10  
11 groups when postnatal outcomes were considered, with the exception of NICU  
12  
13 admission. The odds of a baby being admitted to NICU was 1.31 times (95% CI:  
14  
15 1.18-1.45) higher among women with obesity in contrast to women with normal  
16  
17 weight.  
18  
19

## 20 21 22 23 24 25 26 **Discussion**

27  
28  
29 In this large, retrospective study using a staged approach to analysis, we found that  
30  
31 women with overweight or obesity during pregnancy were at increased risk of  
32  
33 several adverse pregnancy and delivery complications, and as well as poor neonatal  
34  
35 outcomes. Some earlier studies have also found similar findings, although most  
36  
37 studies to date have tended to focus on the association between women with obesity  
38  
39 (not including overweight) and these outcomes. However, a greater number of  
40  
41 women are likely to be with overweight rather than obesity, so it is important to also  
42  
43 understand the impact of overweight on pregnancy and neonatal outcomes.  
44  
45  
46

47  
48 In terms of the association between high maternal BMI and conditions that occur  
49  
50 during pregnancy, we found that the risk of all the conditions considered (gestational  
51  
52 hypertension, gestational diabetes and pre-eclampsia) increased steadily with  
53  
54 increasing BMI, which is in line with similar studies (3,4,5). A study compared women  
55  
56  
57  
58  
59  
60

1  
2  
3 with normal weight to women with morbid obesity (BMI greater than 40), and also  
4  
5 found that there was an increased risk of pre-eclampsia (OR 4.82; 95% CI: 4.04-  
6  
7 5.74) (4). Our study also found that, aside from heightened pre-eclampsia risk for  
8  
9 women with obesity, being overweight was also significantly associated with this  
10  
11 outcome, albeit to a lesser degree. A meta-analysis of the association between  
12  
13 maternal BMI and the risk of pre-eclampsia showed that the risk doubled with each  
14  
15 5-7 kg/m<sup>2</sup> increase in pre-pregnancy BMI (15). It is evident that the risk of pre-  
16  
17 eclampsia increases with weight gain; therefore preventative strategies should be  
18  
19 focussed on getting women, especially those already overweight, to reduce weight  
20  
21 prior to conception. Weight loss in pregnancy requires careful management in order  
22  
23 to avoid unintended consequences (16). Nevertheless, women often engage with  
24  
25 health professionals during pregnancy; therefore dietary and lifestyle interventions  
26  
27 such as physical activity, which have been shown by reviews and meta-analyses  
28  
29 (16,17) to reduce gestational weight gain and improve outcomes for both mother and  
30  
31 baby, could be provided to them.  
32  
33  
34  
35  
36

37  
38 Generally, rates of caesarean delivery have increased significantly across many  
39  
40 developed countries in recent years (18). Our study found that women with  
41  
42 overweight and obesity showed an increased risk of caesarean delivery (both  
43  
44 elective and emergency) compared to normal-weight women, but we note that the  
45  
46 overall frequency of caesarean delivery across our obstetric population seems quite  
47  
48 high, compared to a previous Swedish study (4). Possible reasons could be that  
49  
50 caesarean delivery is probably less risky now, due to advances in medical science,  
51  
52 which facilitate accurate monitoring of the progress of labour and fetal intra-partum  
53  
54 condition (19). Nevertheless, this is quite concerning for Scotland, which has  
55  
56  
57  
58  
59  
60

1  
2  
3 invested in programmes aimed at promoting natural birth such as keeping childbirth  
4 natural and dynamic (KCND). The KCND is a maternity care programme introduced  
5 by the Scottish Government with the aim of maximising opportunities for women to  
6 have as natural a birth experience as possible, reduce unnecessary interventions in  
7 low-risk pregnancy and childbirth, and to provide women-centred care (20,21,22).  
8  
9  
10  
11  
12

13  
14  
15 We found that stillbirth was significantly associated with obesity and not overweight.  
16 Scott-Pillai et al. (5) observed that women with overweight were not at increased risk  
17 of stillbirth, neither were class I (BMI 30.00-34.99) and II (BMI 35.00-39.99) obesity.  
18 However, women in obesity class III (BMI  $\geq 40$ ) were at increased risk of stillbirth.  
19 Cedergrén (4) also found that stillbirth was significantly associated with both obesity  
20 and morbid obesity. Our study also found no significant association between high  
21 maternal BMI and neonatal death. This was also in contrast to a previous study (4).  
22 Since caesarean deliveries were quite frequent among our obstetric study population  
23 as compared with this study, it is likely that health professionals in Scotland are  
24 probably intervening early with regards to problems in labour in women with  
25 overweight and obesity, in order to reduce fetal distress. This early intervention in  
26 labour to reduce fetal distress could also possibly explain our findings that  
27 overweight or obesity was significantly associated with decreased risk of low Apgar  
28 score.  
29  
30  
31  
32  
33  
34  
35  
36  
37  
38  
39  
40  
41  
42  
43  
44  
45  
46  
47

48 This study found that births to women with overweight and obesity were associated  
49 with decreased risk of small-for-gestational age and pre-term delivery, compared  
50 with women with normal weight. This an unexpected protective effect and we  
51 suspect that excess weight in pregnancy may shift the entire birth weight distribution  
52  
53  
54  
55  
56  
57  
58  
59  
60



1  
2  
3 upwards, perhaps through hormonal mechanisms that operate in full-blown cases of  
4 macrosomia in infants of diabetic mothers. Further studies may be required to  
5 enhance our understanding of the mechanism by which different maternal weight  
6 categories affect stillbirth and neonatal death.  
7  
8  
9  
10

### 11 12 13 **Strengths and limitations**

14  
15 This study used a large, retrospective, national database covering all major maternal  
16 and neonatal outcomes and the staged analysis approach we employed ensured an  
17 estimate of the independent impact of high maternal-weight status on each outcome.  
18  
19 The dataset we used combined underweight and normal weight women as normal  
20 BMI group. Using this as reference group might have strengthened the association  
21 between high maternal BMI and the pregnancy and neonatal outcomes considered.  
22  
23 However, only a very small number of women are underweight during pregnancy in  
24 Scotland in recent years. Also, some studies differentiate between the different  
25 obesity categories, but in this study all women with BMI of 30 or more were  
26 considered as having obesity. It is likely that differentiating morbid obesity or obesity  
27 class II and III from women with obesity would have generated additional insight.  
28  
29 Although we restricted the analysis to only single births, the nature of the analysis  
30 meant that women who may have had more than one delivery during the study  
31 period contributed data on more than one birth, so not all outcomes were strictly  
32 independent.  
33  
34  
35  
36  
37  
38  
39  
40  
41  
42  
43  
44  
45  
46  
47  
48  
49  
50

### 51 **Conclusion**

52  
53 This study has shown that women with overweight and obesity in Scotland are at  
54 greater risk of several pregnancy and delivery complications including gestational  
55  
56  
57  
58  
59  
60

1  
2  
3 hypertension, gestational diabetes, pre-eclampsia, labour induction and caesarean  
4 delivery. The risk of these conditions increases steadily with increasing BMI. Women  
5 with obesity also had 2-fold risk increase for stillbirth. Health professionals should be  
6 empowered to deliver promising dietary and lifestyle interventions to women at risk  
7 of overweight and obesity prior to conception, and control excessive weight gain in  
8 pregnancy.  
9  
10  
11  
12  
13  
14  
15  
16  
17  
18  
19  
20  
21  
22  
23  
24  
25  
26  
27  
28  
29  
30  
31  
32  
33  
34  
35  
36  
37  
38  
39  
40  
41  
42  
43  
44  
45  
46  
47  
48  
49  
50  
51  
52  
53  
54  
55  
56  
57  
58  
59  
60

## References

1. Rooney BL, Schauberger CW. Excess pregnancy weight gain and long-term obesity: one decade later. *Obstet Gynecol* 2002; **100(2)**: 245-252.
2. Wilson BJ, Watson MS, Prescott GJ, Sunderland S, Campbell DM, Hannaford P, Smith WCS. Hypertensive diseases of pregnancy and risk of hypertension and stroke in later life: results from cohort study. *BMJ* 2002; **326**: 845–849.
3. Kumari P, Gupta M, Kahlon P, Malviya S. Association between high maternal body mass index and fetomaternal Outcome. *J Obes Metab Res* 2014; **1**: 143-148.
4. Cedergren MI. Maternal morbid obesity and the risk of adverse pregnancy outcome. *Obstetricians and Gynecologists* 2004; **103**: 219-224.
5. Scott-Pillai R, Spence D, Cardwell C, Hunter A, Holmes V. The impact of body mass index on maternal and neonatal outcomes: a retrospective study in a UK obstetric population, 2004–2011. *BJOG* 2013; **120**: 932–939.
6. Rahman MM, Abe SK, Kanda M, Narita S, Rahman MS, Bilano V, Ota E, Gilmour S, Shibuya K. Maternal body mass index and the risk of birth and maternal health outcomes in low- and middle-income countries: a systematic review and meta-analysis. *Obesity Reviews* 2015; **16**: 758–770.
7. Heslehursts N, Lang R, Rankin J, Wilkinson J, Summerbell CD. Obesity in pregnancy: a study of the impact of maternal obesity on NHS maternity services. *BJOG* 2007; **114(3)**: 334-342.
8. Furness PJ, McSevery K, Arden MA, Garland C, Dearden AM, Soltani H. Maternal obesity support services: a qualitative study of the perspectives of women and midwives. *BMC Pregnancy and Childbirth* 2011; **11**: 69.

- 1  
2  
3 9. Lenoir-Wijnkoop I, van der Beek EM, J Garssen, Nuijten MJC, Uauy RD.  
4  
5 Health economic modeling to assess short-term costs of maternal overweight,  
6  
7 gestational diabetes, and related macrosomia – a pilot evaluation. *Front*  
8  
9 *Pharmacol* 2015; **6**:103. doi: 10.3389/fphar.2015.00103.  
10
- 11 10. Doi L, Williams AJ, Frank J. How has child growth around adiposity rebound  
12  
13 altered in Scotland since 1990 and what are the risk factors for weight gain  
14  
15 using the Growing Up in Scotland birth cohort 1? *BMC Public Health* 2016;  
16  
17 **16**: 1081.  
18
- 19 20 11. Information Service Division (2018). Scottish birth record.  
21  
22 [http://www.ndc.scot.nhs.uk/Data-Dictionary/SMR-Datasets/Scottish-Birth-](http://www.ndc.scot.nhs.uk/Data-Dictionary/SMR-Datasets/Scottish-Birth-Record/)  
23  
24 [Record/](http://www.ndc.scot.nhs.uk/Data-Dictionary/SMR-Datasets/Scottish-Birth-Record/)  
25
- 26 12. Cole TJ, Freeman JV, Preece MA. Body mass index reference curves for the  
27  
28 UK, 1990. *Arch Dis Child* 1995; **73(1)**: 25–29.  
29
- 30 31 13. Freeman JV, Cole TJ, Chinn S, Jones PRM, White EM, Preece MA. Cross-  
32  
33 sectional stature and weight reference curves for the UK 1990. *Arch Dis Child*  
34  
35 1995; **73(1)**:17–24.  
36
- 37 14. StataCorp. Stata statistical software: release 14. College Station: StataCorp  
38  
39 LP; 2015.  
40
- 41 42 15. O'Brien TE, Ray JG, Chan WS. Maternal body mass index and the risk of  
43  
44 preeclampsia: A systematic overview. *Epidemiology* 2003; **14**: 368-374.  
45
- 46 16. Shieh C, Cullen DL, Pike C, Pressler SJ. Intervention strategies for preventing  
47  
48 excessive gestational weight gain: systematic review and meta-analysis.  
49  
50 *Obesity Reviews* 2018; doi: 10.1111/obr.12691.  
51
- 52 17. Thangaratinam S, Rogozinska E, Jolly K, Glinkowski S, Roseboom T,  
53  
54 Tomlinson JW, Kunz R, Mol BW, Coomarasamy A, Khan KS. Effects of  
55  
56  
57  
58  
59  
60

- 1  
2  
3 interventions in pregnancy on maternal weight and obstetric outcomes: Meta-  
4 analysis of randomised evidence. *BMJ*. 2012; **344**: e2088.  
5  
6  
7 18. Althabe F, Sosa C, Belizán JM, Gibbons L, Jacquerioz F, Bergel E. Cesarean  
8 section rates and maternal and neonatal mortality in low-, medium-, and high-  
9 income countries: an ecological study. *Birth* 2006; **33(4)**: 270-277.  
10  
11  
12 19. Rezaie M, Shahoe R, Shahghebi S. The effect of maternal body mass index  
13 on the delivery route in nulliparous women. *Journal of Public Health and*  
14 *Epidemiology* 2013; **5(8)**: 346-350.  
15  
16  
17 20. Health Improvement Scotland (2009). Pathways for maternity care.  
18 <http://www.healthcareimprovementscotland.org/default.aspx?page=12536>  
19  
20  
21 21. Abhyankar P, Cheyne H, Maxwell M, McCourt C. A realist evaluation of a  
22 normal birth programme. *Evidence Based Midwifery* 2013;  
23 [https://www.rcm.org.uk/learning-and-career/learning-and-research/ebm-](https://www.rcm.org.uk/learning-and-career/learning-and-research/ebm-articles/a-realist-evaluation-of-a-normal-birth)  
24 [articles/a-realist-evaluation-of-a-normal-birth.](https://www.rcm.org.uk/learning-and-career/learning-and-research/ebm-articles/a-realist-evaluation-of-a-normal-birth)  
25  
26  
27 22. Cheyne H, Abhyankar P, McCourt C. Empowering change: realist evaluation  
28 of a Scottish Government programme to support normal birth. *Midwifery* 2013;  
29 **29**: 1110–1121.  
30  
31  
32  
33  
34  
35  
36  
37  
38  
39  
40  
41  
42  
43  
44  
45

## 46 Funding

47  
48 This work was funded by the SCPHRP core grant from the Medical Research  
49 Council (Grant Number MR/K023209/1) and the Chief Scientist Office of Scotland.  
50  
51 AJW is supported by the European Centre for Environment and Human Health,  
52  
53 University of Exeter. LM is supported by the Farr Institute @ Scotland, which is  
54  
55  
56  
57  
58  
59  
60

1  
2  
3 supported by a 10-funder consortium: Arthritis Research UK, the British Heart  
4 Foundation, Cancer Research UK, the Economic and Social Research Council, the  
5 Engineering and Physical Sciences Research Council, the Medical Research  
6 Council, the National Institute of Health Research, the National Institute for Social  
7 Care and Health Research (Welsh Assembly Government), the Chief Scientist Office  
8 (Scottish Government Health Directorates), (MRC Grant No: MR/K007017/1). The  
9 funders played no role in the conceptualisation or realisation of the research and no  
10 role in the decision to submit it for publication.  
11  
12  
13  
14  
15  
16  
17  
18  
19  
20  
21  
22

### 23 **Competing interest**

24  
25 The authors declare that they have no competing interests.  
26  
27  
28  
29

### 30 **Data sharing**

31  
32 No additional data available.  
33  
34  
35  
36

### 37 **Acknowledgements**

38  
39 The authors are grateful to the Electronic Data Research and Innovation Service of  
40 the Information Services Division, NHS National Services Scotland for providing the  
41 data used in this paper.  
42  
43  
44  
45  
46  
47

### 48 **Authors' contributions**

49  
50 LD, AJW and JF conceived the original idea for the study and obtained the data.  
51  
52 AJW led the statistical analysis with support from LD, LM and JF. LD wrote the first  
53  
54  
55  
56  
57  
58  
59  
60

1  
2  
3  
4  
5  
6  
7  
8  
9  
10  
11  
12  
13  
14  
15  
16  
17  
18  
19  
20  
21  
22  
23  
24  
25  
26  
27  
28  
29  
30  
31  
32  
33  
34  
35  
36  
37  
38  
39  
40  
41  
42  
43  
44  
45  
46  
47  
48  
49  
50  
51  
52  
53  
54  
55  
56  
57  
58  
59  
60

draft of the paper and all authors revised successive drafts and approved the final manuscript.

For peer review only

1  
2  
3 Figure 1. Maternal weight status and neonatal outcomes analysis  
4  
5  
6  
7  
8  
9  
10  
11  
12  
13  
14  
15  
16  
17  
18  
19  
20  
21  
22  
23  
24  
25  
26  
27  
28  
29  
30  
31  
32  
33  
34  
35  
36  
37  
38  
39  
40  
41  
42  
43  
44  
45  
46  
47  
48  
49  
50  
51  
52  
53  
54  
55  
56  
57  
58  
59  
60

For peer review only



1  
2  
3  
4  
5  
6  
7  
8  
9  
10  
11  
12  
13  
14  
15  
16  
17  
18  
19  
20  
21  
22  
23  
24  
25  
26  
27  
28  
29  
30  
31  
32  
33  
34  
35  
36  
37  
38  
39  
40  
41  
42  
43  
44  
45  
46  
47  
48  
49  
50  
51  
52  
53  
54  
55  
56  
57  
58  
59  
60

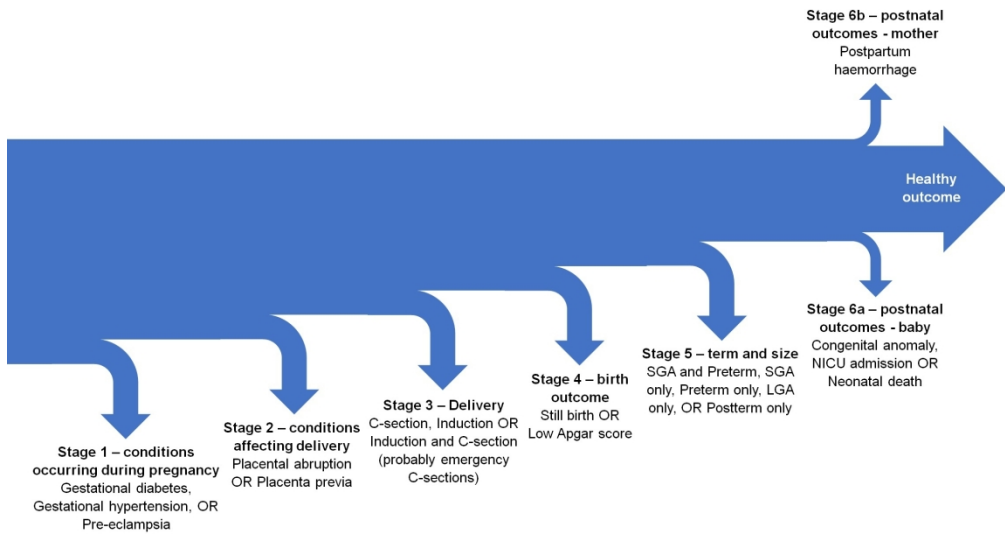

192x103mm (300 x 300 DPI)

# BMJ Open

## A cohort study of high maternal Body Mass Index and the risk of adverse pregnancy, delivery and neonatal outcomes in Scotland

|                                 |                                                                                                                                                                                                                                                                                                                                                    |
|---------------------------------|----------------------------------------------------------------------------------------------------------------------------------------------------------------------------------------------------------------------------------------------------------------------------------------------------------------------------------------------------|
| Journal:                        | <i>BMJ Open</i>                                                                                                                                                                                                                                                                                                                                    |
| Manuscript ID                   | bmjopen-2018-026168.R1                                                                                                                                                                                                                                                                                                                             |
| Article Type:                   | Original research                                                                                                                                                                                                                                                                                                                                  |
| Date Submitted by the Author:   | 17-Jun-2019                                                                                                                                                                                                                                                                                                                                        |
| Complete List of Authors:       | Doi, Lawrence; University of Edinburgh, Scottish Collaboration for Public Health Research and Policy, School of Health in Social Science<br>Williams, Andrew James; University of Exeter<br>Marryat, Louise; University of Edinburgh, SCPHRP<br>Frank, John; University of Edinburgh, Scottish Collaboration for Public Health Research and Policy |
| <b>Primary Subject Heading</b>: | Obstetrics and gynaecology                                                                                                                                                                                                                                                                                                                         |
| Secondary Subject Heading:      | Epidemiology, Paediatrics, Public health, Reproductive medicine, Health policy                                                                                                                                                                                                                                                                     |
| Keywords:                       | OBSTETRICS, EPIDEMIOLOGY, PUBLIC HEALTH                                                                                                                                                                                                                                                                                                            |
|                                 |                                                                                                                                                                                                                                                                                                                                                    |

SCHOLARONE™  
Manuscripts

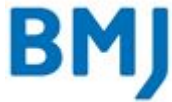

I, the Submitting Author has the right to grant and does grant on behalf of all authors of the Work (as defined in the below author licence), an exclusive licence and/or a non-exclusive licence for contributions from authors who are: i) UK Crown employees; ii) where BMJ has agreed a CC-BY licence shall apply, and/or iii) in accordance with the terms applicable for US Federal Government officers or employees acting as part of their official duties; on a worldwide, perpetual, irrevocable, royalty-free basis to BMJ Publishing Group Ltd ("BMJ") its licensees and where the relevant Journal is co-owned by BMJ to the co-owners of the Journal, to publish the Work in this journal and any other BMJ products and to exploit all rights, as set out in our [licence](#).

The Submitting Author accepts and understands that any supply made under these terms is made by BMJ to the Submitting Author unless you are acting as an employee on behalf of your employer or a postgraduate student of an affiliated institution which is paying any applicable article publishing charge ("APC") for Open Access articles. Where the Submitting Author wishes to make the Work available on an Open Access basis (and intends to pay the relevant APC), the terms of reuse of such Open Access shall be governed by a Creative Commons licence – details of these licences and which [Creative Commons](#) licence will apply to this Work are set out in our licence referred to above.

Other than as permitted in any relevant BMJ Author's Self Archiving Policies, I confirm this Work has not been accepted for publication elsewhere, is not being considered for publication elsewhere and does not duplicate material already published. I confirm all authors consent to publication of this Work and authorise the granting of this licence.

# A cohort study of high maternal Body Mass Index and the risk of adverse pregnancy, delivery and neonatal outcomes in Scotland

Lawrence Doi<sup>1\*</sup>, Andrew James Williams<sup>2</sup>, Louise Marryat<sup>3,4</sup>, John Frank<sup>3,5</sup>

\*Correspondence: [larry.doi@ed.ac.uk](mailto:larry.doi@ed.ac.uk)

<sup>1</sup>Scottish Collaboration for Public Health Research and Policy, School of Health in Social Science, University of Edinburgh, Doorway 6, Old Medical School, Teviot Place, EH8 9AG, UK.

<sup>2</sup>European Centre for Environment and Human Health, College of Medicine and Health, University of Exeter, Knowledge Spa, Royal Cornwall Hospital, Truro, Cornwall TR1 3HD, UK.

<sup>3</sup>Farr Institute at Scotland, University of Edinburgh, Nine, Edinburgh BioQuarter, 9 Little France Road, Edinburgh EH16 4UX, UK.

<sup>4</sup>Centre for Clinical Brain Sciences, University of Edinburgh, Royal Edinburgh Hospital, Kennedy Tower, Morningside Park, Edinburgh EH10 5HF, UK.

<sup>5</sup>Usher Institute of Population Health Sciences and Informatics, University of Edinburgh, Doorway 1, Old Medical School, Teviot Place, EH8 9AG, UK.

## Abstract

**Objective:** To examine the association between high maternal weight status on pregnancy, delivery and neonatal outcomes.

**Setting:** Scotland

**Participants:** Data from 135,858 first time singleton deliveries in Scotland between 2008 and 2015 were used. Women with overweight and obesity were compared with women with normal weight. Associations between maternal body mass index and pregnancy and neonatal outcomes were evaluated in a staged fashion, according to the clinical timelines by which pregnancy, delivery and neonatal outcomes occur.

**Outcome measures:** Gestational diabetes, gestational hypertension, pre-eclampsia, placenta praevia, placental abruption, postpartum haemorrhage, induction of labour, elective and emergency caesarean sections, pre-term delivery, post-term delivery, low Apgar score, stillbirth, congenital anomalies, neonatal intensive care unit admission, neonatal death, small for gestational age and large for gestational age.

**Results:** In the multivariable models controlling for potential covariates, we found that compared with women with normal weight, the odds of the following outcomes were significantly increased for women with overweight and obesity [overweight adjusted odds ratio; 95% confidence interval, followed by the same for women with obesity]: gestational hypertension [1.62; 1.5-1.75], [2.61; 2.42-2.82] ; gestational diabetes [2.19; 1.91-2.52], [8.71; 7.74-9.81] ; pre-eclampsia [1.47; 1.33-1.63] [2.19; 1.98-2.42] ]; labour induction [1.33; 1.27-1.39], [1.76; 1.67-1.86] ; emergency caesarean section [1.90; 1.78-2.02], [3.34; 3.12-3.57] and stillbirth [2.27; 1.20-4.29], [3.21; 1.59-6.48].

1  
2  
3 **Conclusions:** Women with overweight and obesity in Scotland are at greater risk of  
4 adverse pregnancy, delivery and neonatal outcomes. The risk of these conditions  
5 increases steadily with increasing body mass index. Health professionals should be  
6 empowered and trained to deliver promising dietary and lifestyle interventions to  
7 women at risk of overweight and obesity prior to conception, and control excessive  
8 weight gain in pregnancy.  
9  
10  
11  
12  
13  
14  
15  
16  
17  
18  
19  
20  
21

### Strengths and limitations of this study

- This study used a large, retrospectively accessed but cohort-structured, national database covering all major maternal and neonatal outcomes in Scotland over eight recent years.
  - The staged analysis approach employed ensured an estimate of the precise impact of high maternal-weight status on each outcome.
  - All women with BMI of 30 kg/m<sup>2</sup> or more were considered as having obesity; it is likely that differentiating morbid obesity or obesity class II and III from obesity would have generated more precise risk estimates.
  - The completeness of the recording of BMI increased during the study period (2008 to 2015) from 69% to 98%. Using data from the earlier years when the BMI was missing more often might have biased the study sample if it was the case that BMI was not missing at random.
- 22  
23  
24  
25  
26  
27  
28  
29  
30  
31  
32  
33  
34  
35  
36  
37  
38  
39  
40  
41  
42  
43  
44  
45  
46  
47  
48  
49  
50  
51  
52  
53  
54  
55  
56  
57  
58  
59  
60

## Introduction

The increasing global prevalence of overweight and obesity makes it more likely that a growing number of women with high body mass index (BMI) are becoming pregnant. High maternal BMI during pregnancy has adverse health implications for women (1,2) and predisposes the unborn child to adverse outcomes, including neonatal deaths, stillbirth, and admission to a neonatal unit (3,4,5). A recent international systematic review involving 38 studies found that even modest increases in maternal BMI were associated with increased risk of fetal death, stillbirth, and neonatal, perinatal, and infant death (6). Obesity in pregnancy can have health implications later in life for both mother and child. Among women this could lead to diabetes, heart disease and hypertension, whilst children are more prone to future obesity and hypertension (7). Wider service and economic consequences can also be seen including indirect burdens of illness and associated costs, in that women with high BMI also experience adverse birth outcomes such as neonatal death or stillbirth (8,9,10). Such individuals may require support from family and friends as well as bereavement support services within the community. There are also substantial healthcare cost implications for infants who may require medical attention. For example, a recent study examining infant health utilisation and costs on the NHS in the UK of infants born to women with overweight or obesity found that total mean additional resource cost for infants born to women who are overweight was £65.13, and £1138.11 for infants born to women who are obese (11).

Maternal weights are currently high in Scotland: a recent study reported that 31.5% of mothers were overweight and a further 23.6% were affected by obesity (12).

Another study examining the impact of maternal BMI on clinical complications, inpatient

1  
2  
3 admissions, and additional short-term costs to the NHS in Scotland revealed that maternal  
4 BMI influences maternal and neonatal morbidity, the number and duration of maternal and  
5 neonatal admissions, and health service costs (13). However, no recent study in  
6  
7 Scotland has investigated the effect of high maternal BMI on the risk of pregnancy  
8 and neonatal outcomes. The aim of this study was to examine the associations  
9  
10 between high maternal BMI during pregnancy and perinatal risks, including adverse  
11 neonatal outcomes. Understanding of these associations can highlight areas where  
12 prevention strategies could be targeted.  
13  
14  
15  
16  
17  
18  
19  
20  
21  
22  
23

## 24 **Methods**

### 25 ***Study population and data sources***

26  
27 This retrospective cohort study used data from 135,858 first time mothers who gave  
28 birth to only one child in Scotland between January 2008 and December 2015. The  
29 women and infants were identified within three electronic medical record databases:  
30 the Scottish Morbidity Record (SMR) 01 and 02 and Scottish Birth Record (SBR).  
31 SMR01 is generated for patients receiving inpatient or day care in the General or  
32 Acute specialties, whilst SMR02 is generated for patients receiving inpatient or day  
33 care in the Obstetric Specialties. The SBR records all of a baby's neonatal care in  
34 Scotland. The outcome variables are recorded in these databases according the  
35 World Health Organization's International Classification of Diseases, Tenth Revision  
36 (ICD-10). Further description of the content of these databases is available (14) and  
37 in the web-appendix. The study was designed as a clinical audit so did not require  
38 approval from a Research Ethics Committee. However, approval was obtained from  
39  
40  
41  
42  
43  
44  
45  
46  
47  
48  
49  
50  
51  
52  
53  
54  
55  
56  
57  
58  
59  
60



the Public Benefit and Privacy Panel via the national Electronic Data Research and Innovation Service to use the anonymised data collected by these registries.

### ***Patient and public involvement***

Patients were not involved in the design, analysis and interpretation of this study.

### ***Exposure variable***

More than 80% of pregnant women in Scotland present themselves for antenatal care during the first trimester of their pregnancy. Height and weight are measured by the midwife at the first antenatal visit, typically before 12 weeks of pregnancy. Body mass index was calculated using the formula weight (kg)/height (m<sup>2</sup>). BMI completeness was 69% in 2008 but this increased gradually to 87% in 2011 when recording of weight and height became mandatory. By 2015 BMI completeness was 98%. Women were categorised into three BMI groups as described in Table 1.

Table 1. Adult BMI definitions used

| <b>Variable</b>        | <b>Category</b> | <b>BMI Definition</b>                          |
|------------------------|-----------------|------------------------------------------------|
| Maternal weight status | Normal          | <25 kg/m <sup>2</sup>                          |
|                        | Overweight      | ≥25 kg/m <sup>2</sup> to <30 kg/m <sup>2</sup> |
|                        | Obesity         | ≥30 kg/m <sup>2</sup>                          |

### ***Outcomes***

Outcome measures included were maternal or pregnancy complications such as gestational diabetes, gestational hypertension, pre-eclampsia (high blood pressure and protein in urine), placenta praevia (when a baby's placenta partially or totally covers the mother's cervix), placental abruption (when the placenta separates early from the uterus before childbirth) and postpartum haemorrhage (loss of more than

1  
2  
3 500 ml or 1,000 ml of blood within the first 24 hours following childbirth). Delivery  
4  
5 complications studied were induction of labour, caesarean delivery (includes elective  
6  
7 and emergency caesarean sections), pre-term delivery (defined as less than 37  
8  
9 weeks of gestation), post-term delivery (more than 42 weeks of gestation), small for  
10  
11 gestational age (SGA), and large for gestational age (LGA). SGA were infants with  
12  
13 birthweight of  $\leq 10^{\text{th}}$  percentile for gestational age according to UK1990 growth  
14  
15 reference curve (15,16), and those with LGA were infants with birth weight  $\geq 90^{\text{th}}$   
16  
17 percentile.  
18  
19

20  
21  
22 Neonatal outcomes studied were: low Apgar score (less than "7" at 5 minutes),  
23  
24 stillbirth, congenital anomalies, neonatal intensive care unit (NICU) admission,  
25  
26 neonatal death.  
27  
28

### 29 30 **Covariates**

31  
32  
33 Maternal age at delivery, smoking during pregnancy and Carstairs 2001 quintiles for  
34  
35 Scotland for the postcode sector of the mother's residence at birth, were considered  
36  
37 as potentially confounding variables and were included as covariates in the adjusted  
38  
39 analyses. Table 2 describes the covariates used in this study by maternal weight  
40  
41 status among singleton (a pregnancy with one fetus as opposed to twins or  
42  
43 multiples) first-time pregnancies. The data in Table 2 show the numbers of women  
44  
45 who had data on age, deprivation and maternal smoking. This means that the total  
46  
47 number of women is slightly larger than the number in stage one of our analysis, as  
48  
49 there were women missing hypertension, diabetes or pre-eclampsia data.  
50  
51  
52  
53  
54  
55  
56  
57  
58  
59  
60

Table 2. Maternal characteristics among normal weight, overweight and obese women<sup>+</sup> (singleton, first pregnancies)

|                                              | Normal* |      | Overweight* |      | Obese* |      |
|----------------------------------------------|---------|------|-------------|------|--------|------|
|                                              | N       | %    | N           | %    | N      | %    |
| <b>Maternal age (y)</b>                      |         |      |             |      |        |      |
| 20-24                                        | 19,874  | 27.2 | 9,368       | 25.3 | 7,016  | 27.3 |
| 25-29                                        | 24,443  | 33.4 | 12,174      | 32.9 | 8,475  | 32.9 |
| 30-34                                        | 20,880  | 28.6 | 10,522      | 28.4 | 6,922  | 26.9 |
| 35-39                                        | 7,933   | 10.9 | 4,928       | 13.3 | 3,325  | 12.9 |
| <b>Carstairs 2001 quintiles for Scotland</b> |         |      |             |      |        |      |
| Q1 (Least deprived)                          | 14,695  | 20.1 | 6,785       | 18.3 | 3,870  | 15.0 |
| Q2                                           | 13,820  | 18.9 | 6,851       | 18.5 | 4,639  | 18.0 |
| Q3                                           | 14,581  | 19.9 | 7,549       | 20.4 | 5,117  | 19.9 |
| Q4                                           | 15,338  | 21.0 | 7,994       | 21.6 | 6,079  | 23.6 |
| Q5 (Most deprived)                           | 14,696  | 20.1 | 7,813       | 21.1 | 6,033  | 23.4 |
| <b>Maternal smoking in pregnancy</b>         |         |      |             |      |        |      |
| No                                           | 62,439  | 85.4 | 31,806      | 86.0 | 21,604 | 83.9 |
| Yes                                          | 10,691  | 14.6 | 5,186       | 14.0 | 4,134  | 16.1 |

\*Maternal weight status at first antenatal visit

<sup>+</sup>Figures show women who had complete data on age, deprivation and maternal smoking

### Data analysis

Using Stata 14 (17), logistic regression was used to calculate odds ratios (ORs). BMI groups with overweight and obesity were compared with the normal BMI group (the reference population). A confidence interval (CI) of 95% was produced for all ORs.

The analysis of the outcomes proceeded in a staged fashion according to the clinical timelines by which pregnancy, delivery and neonatal outcomes occur (Figure 1).

Firstly, all conditions occurring during pregnancy such as gestational hypertension, gestational diabetes and pre-eclampsia, which may also be a risk factor for later outcomes, were compared with a 'healthy' group who did not have any of these conditions. The second stage of the analysis considered only the group with none of the stage one conditions. Placental abruption, placenta praevia, size for gestational age and whether labour began before, at or after term were considered within this stage because the risk of both conditions is associated with one or more of the stage

1  
2  
3 one conditions. Therefore, by limiting the dataset to those without any of the stage  
4  
5 one conditions, a better estimate of the impact of maternal weight status is  
6  
7 established. This approach means the sample size reduces steadily as one moves  
8  
9 through the process. The stages used for the analyses are outlined in Figure 1. In  
10  
11 the final stage there are two sub-stages because postpartum haemorrhage is a  
12  
13 maternal outcome and we wanted to treat this outcome independent of NICU  
14  
15 admission, congenital anomaly and neonatal death.  
16  
17  
18  
19  
20  
21

22 <Figure 1>  
23  
24

## 25 **Results**

26  
27  
28 Within our study population 53.8 % of pregnant women were categorised as normal  
29  
30 weight, 27.3% overweight and 18.9% were affected by obesity. The socio-  
31  
32 demographic characteristics of the women in the three BMI categories are presented  
33  
34 in Table 2. Maternal smoking prevalence was slightly higher among women with  
35  
36 obesity than in women with normal weight or overweight. Among the women who  
37  
38 were overweight, 21.1% were from the most deprived and 18.3% were from the least  
39  
40 deprived group. However, the difference in social deprivation was more marked  
41  
42 within women with obesity. Among this group, 23.4% were from the most deprived  
43  
44 group whilst 15.0% were from the least deprived group.  
45  
46  
47  
48  
49

50 Table 3 shows odd ratios for pregnancy and delivery complications, as well as  
51  
52 neonatal outcomes, among women who were overweight or obese, and with  
53  
54 singleton first-time births. The risk of the three conditions occurring during pregnancy  
55  
56 increased steadily with increasing BMI. For example, compared to the normal BMI  
57  
58 group, the risk of gestational diabetes was 2.19 (95% CI: 1.91-2.52) but among  
59  
60

1  
2  
3 women who were obese the risk was increased to 8.71 (95% CI: 8.71 – 9.81).

4  
5 Relative to women who were of normal weight, the adjusted OR of pre-eclampsia for  
6  
7 women who were overweight was 1.47 (95% CI: 1.33-1.63) and 2.19 (95% CI: 1.98-  
8  
9 2.42) for women who were obese.  
10  
11  
12  
13  
14  
15  
16  
17  
18  
19  
20  
21  
22  
23  
24  
25  
26  
27  
28  
29  
30  
31  
32  
33  
34  
35  
36  
37  
38  
39  
40  
41  
42  
43  
44  
45  
46  
47  
48  
49  
50  
51  
52  
53  
54  
55  
56  
57  
58  
59  
60

For peer review only

Table 3. Pregnancy and delivery complications and neonatal outcomes among normal, overweight and obese singleton women

|                                                          | Total sample | Normal N (%)  | Cases (%)     | Overweight N (%) | Cases (%)    | Adjusted OR* (95% CI) | Obese N (%)   | Cases (%)    | Adjusted OR* (95% CI) |
|----------------------------------------------------------|--------------|---------------|---------------|------------------|--------------|-----------------------|---------------|--------------|-----------------------|
| <b>Stage 1: Conditions occurring during pregnancy</b>    |              |               |               |                  |              |                       |               |              |                       |
| Gestational hypertension                                 | 128,977      | 70,276 (54.5) | 1,554 (2.2)   | 35,152 (27.3)    | 1,241 (3.5)  | 1.62 (1.50, 1.75)     | 23,549 (18.3) | 1,280 (5.4)  | 2.61 (2.42, 2.82)     |
| Gestational diabetes                                     | 126,779      | 69,099 (54.5) | 377 (0.6)     | 34,329 (27.1)    | 418 (1.2)    | 2.19 (1.91, 2.52)     | 23,351 (18.4) | 1,082 (4.6)  | 8.71 (7.74, 9.81)     |
| Pre-eclampsia                                            | 127,155      | 69,644 (54.8) | 922 (1.3)     | 34,586 (27.2)    | 675 (2.0)    | 1.47 (1.33, 1.63)     | 22,925 (18.0) | 656 (2.9)    | 2.19 (1.98, 2.42)     |
| <b>Stage 2: Conditions affecting delivery</b>            |              |               |               |                  |              |                       |               |              |                       |
| Placenta praevia                                         | 74,076       | 42,021 (56.7) | 102 (0.2)     | 19,817 (26.8)    | 64 (0.3)     | 1.28 (0.93, 1.75)     | 12,238 (16.5) | 29 (0.2)     | 0.96 (0.64, 1.46)     |
| Placental abruption                                      | 74,081       | 42,040 (56.8) | 121 (0.3)     | 19,800 (26.7)    | 47 (0.2)     | 0.80 (0.57, 1.13)     | 12,241 (16.5) | 32 (0.3)     | 0.87 (0.59, 1.29)     |
| Small for gestational age (SGA)                          | 83,503       | 47,881 (57.3) | 5,962 (12.5)  | 22,017 (26.4)    | 2,264 (10.3) | 0.80 (0.76, 0.84)     | 13,605 (16.3) | 1,396 (10.3) | 0.77 (0.72, 0.82)     |
| Pre-term                                                 | 79,013       | 44,831 (56.7) | 2,912 (6.5)   | 21,057 (26.7)    | 1,304 (6.2)  | 0.94 (0.88, 1.00)     | 13,125 (16.6) | 916 (7.0)    | 1.06 (0.98, 1.14)     |
| SGA and pre-term                                         | 74,510       | 42,260 (56.7) | 341 (0.8)     | 19,915 (26.7)    | 162 (0.8)    | 0.99 (0.82, 1.20)     | 12,335 (16.6) | 126 (1.0)    | 1.19 (0.96, 1.46)     |
| Post-term                                                | 73,947       | 41,950 (56.7) | 31 (0.1)      | 19,775 (26.7)    | 22 (0.1)     | 1.53 (0.88, 2.64)     | 12,222 (16.5) | 13 (0.1)     | 1.52 (0.79, 2.92)     |
| Large for gestational age                                | 107,189      | 58,373 (54.5) | 16,454 (28.2) | 29,480 (27.5)    | 9,727 (33.0) | 1.26 (1.22, 1.30)     | 19,336 (18.0) | 7,127 (36.9) | 1.52 (1.47, 1.58)     |
| <b>Stage 3: Delivery</b>                                 |              |               |               |                  |              |                       |               |              |                       |
| Induction of labour                                      | 55,265       | 33,032 (59.8) | 7,633 (23.1)  | 14,222 (25.7)    | 4,074 (28.7) | 1.33 (1.27, 1.39)     | 8,011 (14.5)  | 2,791 (34.8) | 1.76 (1.67, 1.86)     |
| Caesarean section                                        | 51,963       | 31,235 (60.1) | 5,836 (18.7)  | 13,348 (25.7)    | 3,200 (24.0) | 1.34 (1.28, 1.41)     | 7,380 (14.2)  | 2,160 (29.3) | 1.80 (1.70, 1.91)     |
| Emergency caesarean section                              | 47,620       | 28,178 (59.2) | 2,779 (9.9)   | 12,303 (25.8)    | 2,155 (17.5) | 1.90 (1.78, 2.02)     | 7,139 (15.0)  | 1,919 (26.9) | 3.34 (3.12, 3.57)     |
| <b>Stage 4: Birth outcome</b>                            |              |               |               |                  |              |                       |               |              |                       |
| Apgar score                                              | 40,716       | 25,379 (62.3) | 4,856 (19.1)  | 10,130 (24.9)    | 1,982 (19.6) | 1.02 (0.96, 1.08)     | 5,207 (12.8)  | 983 (18.9)   | 0.95 (0.88, 1.03)     |
| Stillbirth                                               | 32,946       | 20,543 (62.4) | 20 (0.1)      | 8,166 (24.8)     | 18 (0.2)     | 2.27 (1.20, 4.29)     | 4,237 (12.9)  | 13 (0.3)     | 3.21 (1.59, 6.48)     |
| <b>Stage 5: Postnatal outcomes (infant and maternal)</b> |              |               |               |                  |              |                       |               |              |                       |
| NICU admission                                           | 32,722       | 20,423 (62.4) | 719 (3.5)     | 8,101 (24.8)     | 322 (4.0)    | 1.13 (0.98, 1.29)     | 4,198 (12.8)  | 205 (4.9)    | 1.39 (1.18, 1.63)     |
| Neonatal death                                           | -            | 19,707 (62.6) | 3 (<0.1)      | 7,779 (24.7)     | 0 (0.0)      | -                     | 3,993 (12.7)  | 0 (0.0)      | -                     |
| Congenital anomaly                                       | 16,951       | 10,609 (62.6) | 29 (0.3)      | 4,177 (24.6)     | 16 (0.4)     | 1.38 (0.75, 2.54)     | 2,165 (12.8)  | 9 (0.4)      | 1.42 (0.67, 3.01)     |
| Postpartum haemorrhage                                   | 32,895       | 20,523 (62.4) | 3,947 (19.2)  | 8,148 (24.8)     | 1,565 (19.2) | 0.99 (0.93, 1.06)     | 4,224 (12.8)  | 879 (20.8)   | 1.12 (1.03, 1.21)     |

OR = Odd Ratio; CI = Confidence Interval; NICU = Neonatal Intensive Care Unit

\*Adjusted for maternal age, deprivation and smoking in pregnancy

1  
2  
3  
4  
5  
6 Regarding conditions affecting delivery, the odds ratio of placenta praevia were not  
7  
8 statistically significant for both women who were overweight (OR 1.28, 95%CI: 0.93-  
9  
10 1.75) and obese (OR 0.96, 95%CI: 0.64-1.46) compared with women with normal  
11  
12 weight. The odds of experiencing placental abruption were also not significantly  
13  
14 different among the different BMI categories.  
15  
16

17  
18 In contrast with the normal BMI group, births to women who were overweight and  
19  
20 obese were associated with decreased risk of small-for-gestational age, ORs 0.80  
21  
22 (95% CI: 0.76-0.84) and 0.77 (95% CI: 0.72-0.82) respectively. However, the  
23  
24 prevalence of large-for-gestational age increased among women with overweight,  
25  
26 OR of 1.26 (95%CI: 1.22-1.30) and women with obesity, OR 1.52 (95% CI: 1.47-  
27  
28 1.58) compared with women of normal weight.  
29  
30  
31

32  
33  
34 The chance of induction of labour and caesarean section, either elective or  
35  
36 emergency increased with increasing BMI. Women who were overweight had odds  
37  
38 of 1.34 (95% CI: 1.28-1.41) higher for having an elective Caesarean section and  
39  
40 higher odds (OR 1.90, 95% CI: 1.78-2.02) for undergoing emergency Caesarean  
41  
42 section, compared with women of normal weight. The corresponding ORs for women  
43  
44 with obesity were 1.80 (95% CI: 1.70-1.91) and 3.34 (95% CI: 3.12-3.57).  
45  
46  
47

48  
49 In terms of birth outcomes, the risk of stillbirth was not significantly higher for both  
50  
51 women who were overweight (OR 2.27, 95%CI: 1.20-4.29) and obese (OR 3.21,  
52  
53 95%CI: 1.59-6.48) relative to normal weight women. Being overweight (OR 1.02 ,  
54  
55 95% CI: 0.96-1.08 ) or obese (OR 0.95, 95% CI: 0.88-1.03) did not significantly  
56  
57 affect the risk of low Apgar score, likely because women with obesity and  
58  
59  
60

1  
2  
3 overweight may receive increased monitoring, which means issues can be identified  
4 and managed earlier, to reduce any fetal distress in labour.  
5  
6  
7  
8  
9

10 There were no statistically significant differences in ORs among women who were  
11 overweight when postnatal outcomes were considered. However, among women  
12 who were obese, the odds of a baby being admitted to NICU was 1.39 (95% CI:  
13 1.18-1.63) in contrast to women with normal weight. The odds of experiencing  
14 postpartum haemorrhage were also statistically significant for women who were  
15 obese (OR 1.12, 95%CI: 1.03-1.21), compared with women of normal weight.  
16  
17  
18  
19  
20  
21  
22  
23  
24  
25  
26  
27  
28

## 29 **Discussion**

30  
31 In this large, retrospective cohort study using a staged approach to analysis, we  
32 found that overweight or obesity during pregnancy increased the risk of several  
33 adverse pregnancy and delivery complications, and as well as poor neonatal  
34 outcomes. Some earlier studies have also found similar findings. Aside from obesity,  
35 we also examined overweight because in most populations, a greater number of  
36 women are overweight rather than obese, so it is important to also understand the  
37 impact of overweight on pregnancy and neonatal outcomes.  
38  
39  
40  
41  
42  
43  
44  
45  
46  
47  
48  
49

50 In terms of the association between high maternal BMI and conditions that occur  
51 during pregnancy, we found that the risk of all the conditions considered (gestational  
52 hypertension, gestational diabetes and pre-eclampsia) increased steadily with  
53 increasing BMI, which is in line with similar studies (2,3,4). A study compared women  
54 of normal weight to women who were morbidly obese (BMI greater than 40), and also  
55  
56  
57  
58  
59  
60



1  
2  
3 found that there was an increased risk of pre-eclampsia (OR 4.82; 95% CI: 4.04-  
4 5.74) (3). Our study also found that, aside from heightened pre-eclampsia risk for  
5 women with obesity, being overweight was also significantly associated with this  
6 outcome, albeit to a lesser degree. A meta-analysis of the association between  
7 maternal BMI and the risk of pre-eclampsia showed that the risk doubled with each  
8 5-7 kg/m<sup>2</sup> increase in pre-pregnancy BMI (18). It is evident that the risk of pre-  
9 eclampsia increases with the degree of weight gain; therefore preventative strategies  
10 should be focussed on getting women, especially those already overweight, to  
11 reduce weight prior to conception. Weight loss in pregnancy requires careful  
12 management in order to avoid unintended consequences (19). Nevertheless, women  
13 often engage with health professionals during pregnancy; therefore dietary and  
14 lifestyle interventions such as physical activity, which have been shown by reviews  
15 and meta-analyses (19,20) to reduce gestational weight gain and improve outcomes  
16 for both mother and baby, could be provided to them.

17  
18  
19  
20  
21  
22  
23  
24  
25  
26  
27  
28  
29  
30  
31  
32  
33  
34  
35  
36  
37 Generally, rates of Caesarean delivery have increased significantly across many  
38 developed countries in recent years (21). Our study found that women with  
39 overweight and obesity showed an increased risk of Caesarean delivery (both  
40 elective and emergency) compared to normal-weight women, but we note that the  
41 overall frequency of Caesarean delivery across our obstetric population seems quite  
42 high, compared to a previous Swedish study (3). Possible reasons could be that  
43 Caesarean delivery is probably less risky now, due to advances in medical science,  
44 which facilitate accurate monitoring of the progress of labour and fetal intra-partum  
45 condition (22). Nevertheless, this is quite concerning for Scotland, which has  
46 invested in programmes aimed at promoting natural birth such as Keeping Childbirth

1  
2  
3 Natural and Dynamic (KCND). The KCND is a maternity care programme introduced  
4  
5 by the Scottish Government with the aim of maximising opportunities for women to  
6  
7 have as natural a birth experience as possible, reduce unnecessary interventions in  
8  
9 low-risk pregnancy and childbirth, and to provide women-centred care (23,24,25).  
10  
11  
12  
13

14 We found that stillbirth was significantly associated with both overweight and obesity.

15 This is congruent with the Aune et al. (6) systematic review and meta-analysis.

16  
17 However, Scott-Pillai et al. (4) observed that women who were overweight were not  
18  
19 at increased risk of stillbirth, neither were those with class I (BMI 30.00-34.99) and II  
20  
21 (BMI 35.00-39.99) obesity. Women in obesity class III (BMI  $\geq 40$ ) were found to be at  
22  
23 increased risk of stillbirth. Cedergren (3) also found that stillbirth was significantly  
24  
25 associated with both obesity and morbid obesity. Our study found that within the  
26  
27 cohort there were no fetal deaths to first time mothers who were overweight or obese  
28  
29 and who gave birth to only one child. This was in contrast to a previous study (3).  
30  
31  
32  
33

34 Since Caesarean deliveries were more frequent among our obstetric study  
35  
36 population, it is possible that health professionals in Scotland are probably  
37  
38 intervening early with regards to problems in labour among women with overweight  
39  
40 or obesity, in order to reduce fetal distress, and its worst outcome. This early  
41  
42 intervention in labour to reduce fetal distress could also possibly explain our findings  
43  
44 that overweight or obesity was not significantly associated with decreased risk of low  
45  
46 Apgar score.  
47  
48  
49  
50  
51

52 Adiposity increases risk of large-for-gestational age and macrosomia; in this study,  
53  
54 we found that births to women with overweight and obesity were associated with an  
55  
56 increased risk of large-for-gestational age infants compared with women of normal  
57  
58  
59  
60

1  
2  
3 weight. Excess weight in pregnancy may shift the entire birth weight distribution  
4  
5 upwards, perhaps through hormonal mechanisms that operate at lower levels than in  
6  
7 full-blown cases of macrosomia in infants of diabetic mothers.  
8  
9

### 10 11 12 ***Strengths and limitations*** 13

14 This study used a large, retrospectively accessed but cohort-structured, national  
15  
16 database covering all major maternal and neonatal outcomes. The staged analysis  
17  
18 approach we employed ensured a more precise estimate of the impact of high  
19  
20 maternal-weight status on each outcome. We restricted the analysis to only single  
21  
22 births and first pregnancies to ensure that the births in the sample are relatively  
23  
24 independent. The dataset we used combined underweight and normal weight  
25  
26 women as normal BMI group. Using this as reference group might have  
27  
28 strengthened the association between high maternal BMI and the pregnancy and  
29  
30 neonatal outcomes considered. However, only a very small number of women are  
31  
32 underweight during pregnancy in Scotland in recent years. Also, some studies  
33  
34 differentiate between different obesity categories, but in this study all women with  
35  
36 BMI of 30 or more were considered as having obesity. It is likely that differentiating  
37  
38 morbid obesity, or obesity class II and III from women with obesity, would have  
39  
40 generated additional insight. The completeness of the recording of BMI increased  
41  
42 during the study period (2008 to 2015) from 69% to 98%. Using data from the earlier  
43  
44 years, when the BMI was missing more often, might have biased the study sample if  
45  
46 BMI was not missing at random. The study included control for a limited set of  
47  
48 confounders. All these limitations are common in studies like this one, utilising  
49  
50 routinely collected administrative records, but such studies can be undertaken  
51  
52 inexpensively and quickly compared to studies collecting such data first hand.  
53  
54  
55  
56  
57  
58  
59  
60

## Conclusion

This study has shown that women who were overweight and obese in Scotland are at greater risk of several pregnancy and delivery complications including gestational hypertension, gestational diabetes, pre-eclampsia, labour induction and Caesarean delivery. The risk of these conditions increases steadily with increasing BMI. Women with obesity also had three-fold risk increase for stillbirth. Health professionals should be empowered and trained to deliver promising dietary and lifestyle interventions to women at risk of overweight and obesity prior to conception, and control excessive weight gain in pregnancy.

## References

1. Rooney BL, Schauburger CW. Excess pregnancy weight gain and long-term obesity: one decade later. *Obstet Gynecol* 2002; **100(2)**: 245-252.
2. Kumari P, Gupta M, Kahlon P, Malviya S. Association between high maternal body mass index and fetomaternal Outcome. *J Obes Metab Res* 2014; **1**: 143-148.
3. Cedergren MI. Maternal morbid obesity and the risk of adverse pregnancy outcome. *Obstetricians and Gynecologists* 2004; **103**: 219-224.
4. Scott-Pillai R, Spence D, Cardwell C, Hunter A, Holmes V. The impact of body mass index on maternal and neonatal outcomes: a retrospective study in a UK obstetric population, 2004–2011. *BJOG* 2013; **120**: 932–939.
5. Rahman MM, Abe SK, Kanda M, Narita S, Rahman MS, Bilano V, Ota E, Gilmour S, Shibuya K. Maternal body mass index and the risk of birth and maternal health outcomes in low- and middle-income countries: a systematic review and meta-analysis. *Obesity Reviews* 2015; **16**: 758–770.

- 1  
2  
3 6. Aune D, Saugstad OD, Henriksen T, Tonstad S. Maternal body mass index  
4 and the risk of fetal death, stillbirth, and infant death: a systematic review and  
5 meta-analysis. *JAMA* 2014; **311**(15):1536-46.  
6  
7
- 8  
9  
10 7. Leddy MA, Power ML, Schulkin J. The impact of maternal obesity on maternal  
11 and fetal health. *Rev Obstet Gynecol.* 2008;**1**(4):170–178.  
12
- 13  
14 8. Heslehurt N, Lang R, Rankin J, Wilkinson J, Summerbell CD. Obesity in  
15 pregnancy: a study of the impact of maternal obesity on NHS maternity  
16 services. *BJOG* 2007; **114**(3): 334-342.  
17  
18
- 19  
20 9. Furness PJ, McSeveny K, Arden MA, Garland C, Dearden AM, Soltani H.  
21 Maternal obesity support services: a qualitative study of the perspectives of  
22 women and midwives. *BMC Pregnancy and Childbirth* 2011; **11**: 69.  
23  
24
- 25  
26 10. Lenoir-Wijnkoop I, van der Beek EM, J Garssen, Nuijten MJC, Uauy RD.  
27 Health economic modeling to assess short-term costs of maternal overweight,  
28 gestational diabetes, and related macrosomia – a pilot evaluation. *Front*  
29 *Pharmacol* 2015; **6**:103. doi: 10.3389/fphar.2015.00103.  
30  
31
- 32  
33 11. Morgan KL, Rahman MA, Hill RA, et al. Obesity in pregnancy: infant health  
34 service utilisation and costs on the NHS. *BMJ Open* 2015;**5**:e008357.  
35  
36  
37  
38  
39  
40  
41  
42  
43  
44  
45  
46  
47  
48  
49  
50  
51  
52  
53  
54  
55  
56  
57  
58  
59  
60  
doi:10.1136/bmjopen-2015- 008357.
12. Doi L, Williams AJ, Frank J. How has child growth around adiposity rebound  
altered in Scotland since 1990 and what are the risk factors for weight gain  
using the Growing Up in Scotland birth cohort 1? *BMC Public Health* 2016;  
**16**: 1081.
13. Denison FC, Norwood P, Bhattacharya S, Duffy A, Mahmood T, Morris C,  
Raja EA, Norman JE, Lee AJ, Scotland G. Association between maternal

- body mass index during pregnancy, short-term morbidity, and increased health service costs: a population-based study. *BJOG* 2014; **121**:72–82.
14. Information Service Division (2018). Scottish birth record. <http://www.ndc.scot.nhs.uk/Data-Dictionary/SMR-Datasets/Scottish-Birth-Record/>
15. Cole TJ, Freeman JV, Preece MA. Body mass index reference curves for the UK, 1990. *Arch Dis Child* 1995; **73(1)**: 25–29.
16. Freeman JV, Cole TJ, Chinn S, Jones PRM, White EM, Preece MA. Cross-sectional stature and weight reference curves for the UK 1990. *Arch Dis Child* 1995; **73(1)**:17–24.
17. StataCorp. Stata statistical software: release 14. College Station: StataCorp LP; 2015.
18. O'Brien TE, Ray JG, Chan WS. Maternal body mass index and the risk of preeclampsia: A systematic overview. *Epidemiology* 2003; **14**: 368-374.
19. Shieh C, Cullen DL, Pike C, Pressler SJ. Intervention strategies for preventing excessive gestational weight gain: systematic review and meta-analysis. *Obesity Reviews* 2018; doi: 10.1111/obr.12691.
20. Thangaratinam S, Rogozinska E, Jolly K, Glinkowski S, Roseboom T, Tomlinson JW, Kunz R, Mol BW, Coomarasamy A, Khan KS. Effects of interventions in pregnancy on maternal weight and obstetric outcomes: Meta-analysis of randomised evidence. *BMJ*. 2012; **344**: e2088.
21. Althabe F, Sosa C, Belizán JM, Gibbons L, Jacquerioz F, Bergel E. Cesarean section rates and maternal and neonatal mortality in low-, medium-, and high-income countries: an ecological study. *Birth* 2006; **33(4)**: 270-277.

- 1  
2  
3 22. Rezaie M, Shahoe R, Shahghebi S. The effect of maternal body mass index  
4 on the delivery route in nulliparous women. *Journal of Public Health and*  
5 *Epidemiology* 2013; **5(8)**: 346-350.  
6  
7  
8  
9  
10 23. Health Improvement Scotland (2009). Pathways for maternity care.  
11 <http://www.healthcareimprovementscotland.org/default.aspx?page=12536>  
12  
13  
14 24. Abhyankar P, Cheyne H, Maxwell M, McCourt C. A realist evaluation of a  
15 normal birth programme. *Evidence Based Midwifery* 2013;  
16 [https://www.rcm.org.uk/learning-and-career/learning-and-research/ebm-](https://www.rcm.org.uk/learning-and-career/learning-and-research/ebm-articles/a-realist-evaluation-of-a-normal-birth)  
17 [articles/a-realist-evaluation-of-a-normal-birth.](https://www.rcm.org.uk/learning-and-career/learning-and-research/ebm-articles/a-realist-evaluation-of-a-normal-birth)  
18  
19  
20  
21  
22  
23  
24 25. Cheyne H, Abhyankar P, McCourt C. Empowering change: realist evaluation  
25 of a Scottish Government programme to support normal birth. *Midwifery* 2013;  
26 **29**: 1110–1121.  
27  
28  
29  
30  
31  
32  
33  
34  
35  
36  
37  
38  
39  
40

## 41 Funding

42 This work was funded by the SCPHRP core grant from the Medical Research  
43 Council (Grant Number MR/K023209/1) and the Chief Scientist Office of Scotland.  
44  
45 AJW is supported by the European Centre for Environment and Human Health,  
46 University of Exeter. LM is supported by the Farr Institute @ Scotland, which is  
47 supported by a 10-funder consortium: Arthritis Research UK, the British Heart  
48 Foundation, Cancer Research UK, the Economic and Social Research Council, the  
49 Engineering and Physical Sciences Research Council, the Medical Research  
50 Council, the National Institute of Health Research, the National Institute for Social  
51  
52  
53  
54  
55  
56  
57  
58  
59  
60

Care and Health Research (Welsh Assembly Government), the Chief Scientist Office (Scottish Government Health Directorates), (MRC Grant No: MR/K007017/1). The funders played no role in the conceptualisation or realisation of the research and no role in the decision to submit it for publication.

### **Competing interest**

The authors declare that they have no competing interests.

### **Data sharing**

No additional data available.

### **Acknowledgements**

The authors are grateful to the Electronic Data Research and Innovation Service of the Information Services Division, NHS National Services Scotland for providing the data used in this paper.

### **Authors' contributions**

LD, AJW and JF conceived the original idea for the study and obtained the data. AJW led the statistical analysis with support from LD, LM and JF. LD wrote the first draft of the paper and all authors revised successive drafts and approved the final manuscript.



1  
2  
3  
4  
5  
6  
7  
8  
9  
10  
11  
12  
13  
14  
15  
16  
17  
18  
19  
20  
21  
22  
23  
24  
25  
26  
27  
28  
29  
30  
31  
32  
33  
34  
35  
36  
37  
38  
39  
40  
41  
42  
43  
44  
45  
46  
47  
48  
49  
50  
51  
52  
53  
54  
55  
56  
57  
58  
59  
60

Figure 1. Maternal weight status and neonatal outcomes analysis

For peer review only

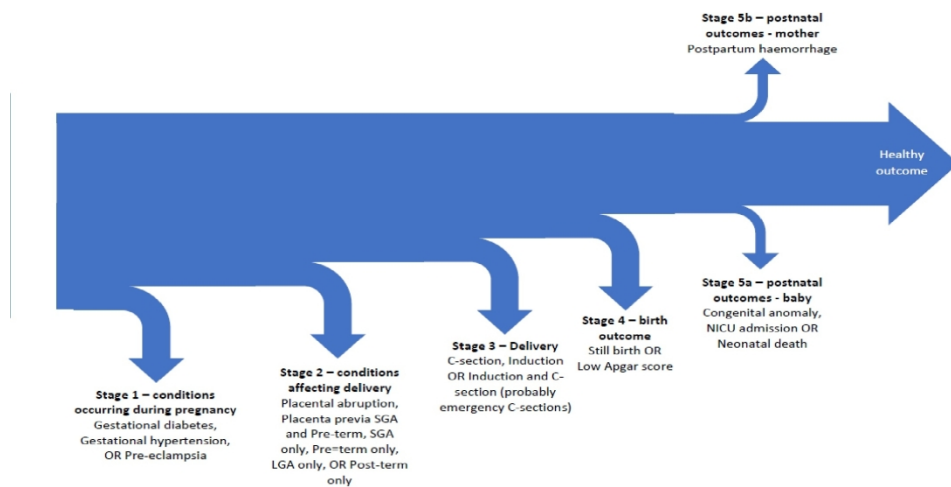

Maternal weight status and neonatal outcomes analysis

192x103mm (300 x 300 DPI)

## Web-appendix: Description of data fields used in the study

| Variable Name       | Database Source      | Variable Description/Values                                                                                                                                                                                                                       | Notes                                                                                                                                                                                                                       |
|---------------------|----------------------|---------------------------------------------------------------------------------------------------------------------------------------------------------------------------------------------------------------------------------------------------|-----------------------------------------------------------------------------------------------------------------------------------------------------------------------------------------------------------------------------|
| Mother_ID           | N/A - study specific | Unique mother identifier                                                                                                                                                                                                                          | 1516-0613/' followed by an anonymous identifier                                                                                                                                                                             |
| Baby_ID             | N/A - study specific | Unique baby identifier                                                                                                                                                                                                                            | Mother_ID followed by delivery sequence number followed by a baby sequence number. The baby sequence number for multiple babies from same delivery not necessarily in correct order due to missing CHI numbers.             |
| Delivery_Seq_No     | N/A - study specific | Delivery sequence number of mother                                                                                                                                                                                                                |                                                                                                                                                                                                                             |
| Gest_Diabetes       | SMR02                | <b>1:</b> Yes, Gestational diabetes (diagnosed during this pregnancy)<br><b>0:</b> Yes, Pre-existing diabetes (diagnosed before pregnancy) & No (no diabetes during this pregnancy)<br><b>Missing:</b> Yes, Time of diagnosis unknown & Not Known | <a href="http://www.ndc.scot.nhs.uk/Dictionary-A-Z/Definitions/index.asp?Search=D&amp;ID=214&amp;Title=Diabetes">http://www.ndc.scot.nhs.uk/Dictionary-A-Z/Definitions/index.asp?Search=D&amp;ID=214&amp;Title=Diabetes</a> |
| Gest_Hypertension   | SMR02/SMR01          | <b>1:</b> ICD 10 code O13.X<br><b>0:</b> All other codes                                                                                                                                                                                          | Flagged codes cover gestational hypertension                                                                                                                                                                                |
| Pre_Eclampsia       | SMR02/SMR01          | <b>1:</b> ICD 10 code O14._<br><b>0:</b> All other codes                                                                                                                                                                                          | Flagged codes cover pre-eclampsia                                                                                                                                                                                           |
| Placental_Abruption | SMR02/SMR01          | <b>1:</b> ICD 10 code O45._<br><b>0:</b> All other codes                                                                                                                                                                                          | Flagged codes cover placental abruption                                                                                                                                                                                     |
| Placental_Praevia   | SMR02/SMR01          | <b>1:</b> ICD 10 code O44._<br><b>0:</b> All other codes                                                                                                                                                                                          | Flagged codes cover placenta praevia                                                                                                                                                                                        |

|                        |             |                                                                                                                                  |                                                                                                                                                                                                                                                                                                   |
|------------------------|-------------|----------------------------------------------------------------------------------------------------------------------------------|---------------------------------------------------------------------------------------------------------------------------------------------------------------------------------------------------------------------------------------------------------------------------------------------------|
| Postpartum_Haemorrhage | SMR02/SMR01 | <b>1:</b> ICD 10 code O72._<br><b>0:</b> All other codes                                                                         | Flagged codes cover postpartum haemorrhage                                                                                                                                                                                                                                                        |
| Caesarean_Delivery     | SMR02       | <b>1:</b> Elective (planned) caesarean section & Emergency and unspecified caesarean section<br><b>0:</b> All other codes        | <a href="http://www.ndc.scot.nhs.uk/Dictionary-A-Z/Definitions/index.asp?Search=M&amp;ID=322&amp;Title=Mode%20of%20Delivery%20-%20Babies%201%20to%203">http://www.ndc.scot.nhs.uk/Dictionary-A-Z/Definitions/index.asp?Search=M&amp;ID=322&amp;Title=Mode of Delivery - Babies 1 to 3</a>         |
| Labour_Induction       | SMR02       | <b>1:</b> 1-8 - Induction of labour codes<br><b>0:</b> 0, None<br><b>Missing:</b> 9, Not known                                   | <a href="http://www.ndc.scot.nhs.uk/Dictionary-A-Z/Definitions/index.asp?Search=I&amp;ID=295&amp;Title=Induction%20of%20Labour">http://www.ndc.scot.nhs.uk/Dictionary-A-Z/Definitions/index.asp?Search=I&amp;ID=295&amp;Title=Induction of Labour</a>                                             |
| SGA                    | SMR02       | <b>1:</b> Birthweight ≤10th percentile<br><b>0:</b> Birthweight >10th percentile                                                 | Small for gestational age flag                                                                                                                                                                                                                                                                    |
| LGA                    | SMR02       | <b>1:</b> Birthweight ≥90th percentile<br><b>0:</b> Birthweight <90th percentile                                                 | Large for gestational age flag                                                                                                                                                                                                                                                                    |
| Preterm_Delivery       | SMR02       | <b>1:</b> Estimated gestation < 37 weeks<br><b>0:</b> Estimated gestation ≥ 37 weeks and ≤ 42 weeks<br><b>Missing:</b> otherwise | <a href="http://www.ndc.scot.nhs.uk/Dictionary-A-Z/Definitions/index.asp?Search=E&amp;ID=242&amp;Title=Estimated%20Gestation">http://www.ndc.scot.nhs.uk/Dictionary-A-Z/Definitions/index.asp?Search=E&amp;ID=242&amp;Title=Estimated Gestation</a>                                               |
| Postterm_Delivery      | SMR02       | <b>1:</b> Estimated gestation > 42 weeks<br><b>0:</b> Estimated gestation ≥ 37 weeks and ≤ 42 weeks<br><b>Missing:</b> otherwise | <a href="http://www.ndc.scot.nhs.uk/Dictionary-A-Z/Definitions/index.asp?Search=E&amp;ID=242&amp;Title=Estimated%20Gestation">http://www.ndc.scot.nhs.uk/Dictionary-A-Z/Definitions/index.asp?Search=E&amp;ID=242&amp;Title=Estimated Gestation</a>                                               |
| Apgar_Score            | SMR02       | <b>1:</b> Apgar score at 5 mins < 7<br><b>0:</b> Apgar score at 5 mins ≥ 7                                                       | <a href="http://www.ndc.scot.nhs.uk/Dictionary-A-Z/Definitions/index.asp?Search=A&amp;ID=88&amp;Title=Apgar%20Score%20-%20Babies%201%20to%203">http://www.ndc.scot.nhs.uk/Dictionary-A-Z/Definitions/index.asp?Search=A&amp;ID=88&amp;Title=Apgar Score - Babies 1 to 3</a>                       |
| Stillbirth             | SMR02       | <b>1:</b> Stillbirth<br><b>0:</b> Livebirth<br><b>Missing:</b> otherwise                                                         | <a href="http://www.ndc.scot.nhs.uk/Dictionary-A-Z/Definitions/index.asp?Search=O&amp;ID=372&amp;Title=Outcome%20of%20Pregnancy%20-%20Babies%201%20to%203">http://www.ndc.scot.nhs.uk/Dictionary-A-Z/Definitions/index.asp?Search=O&amp;ID=372&amp;Title=Outcome of Pregnancy - Babies 1 to 3</a> |

|                                              |                             |       |                                                                                                                                                                                                                                |                                                                                                                                                                                                                                                                                                   |
|----------------------------------------------|-----------------------------|-------|--------------------------------------------------------------------------------------------------------------------------------------------------------------------------------------------------------------------------------|---------------------------------------------------------------------------------------------------------------------------------------------------------------------------------------------------------------------------------------------------------------------------------------------------|
| 1<br>2<br>3<br>4<br>5<br>6<br>7              | Congenital_anomaly          | SBR   | <b>1:</b> Acute life threatening;<br>Non-life threatening & Yes<br><b>0:</b> None<br><b>Missing:</b> Suspected & Not known                                                                                                     | Note there is a lack of completeness until 2010, could be poor quality as not quality checked. Bias in recording levels - e.g. more highly recorded in Glasgow HB than Lothian HB.                                                                                                                |
| 8<br>9<br>10<br>11<br>12<br>13               | NICU_admission              | SMR02 | <b>1:</b> Admitted - for up to 48 hours<br>& Admitted - for more than 48 hours<br><b>0:</b> Not admitted<br><b>Missing:</b> Not known                                                                                          | <a href="http://www.ndc.scot.nhs.uk/Dictionary-A-Z/Definitions/index.asp?Search=N&amp;ID=326&amp;Title=Neonatal%20Indicator%20-%20Babies%201%20to%203">http://www.ndc.scot.nhs.uk/Dictionary-A-Z/Definitions/index.asp?Search=N&amp;ID=326&amp;Title=Neonatal Indicator - Babies 1 to 3</a>       |
| 14<br>15<br>16<br>17<br>18<br>19<br>20<br>21 | Neonatal_death              | SMR02 | <b>1:</b> Livebirth dying within the first 6 days (early neonatal death) & Livebirth dying on or after the 7th completed day but before the 28th day (late neonatal death)<br><b>0:</b> Livebirth<br><b>Missing:</b> Otherwise | <a href="http://www.ndc.scot.nhs.uk/Dictionary-A-Z/Definitions/index.asp?Search=O&amp;ID=372&amp;Title=Outcome%20of%20Pregnancy%20-%20Babies%201%20to%203">http://www.ndc.scot.nhs.uk/Dictionary-A-Z/Definitions/index.asp?Search=O&amp;ID=372&amp;Title=Outcome of Pregnancy - Babies 1 to 3</a> |
| 22<br>23<br>24<br>25<br>26                   | Maternal_Obesity            | SMR02 | <b>1:</b> Obese status<br><b>0:</b> Overweight, Healthy or underweight status                                                                                                                                                  | Adults with BMI $\geq 30$ classed as obese. BMI of girls aged 2 - 19 years old standardized using UK1990 growth reference values and z-score $\geq 6/3$ (98th centile) classed as obese.                                                                                                          |
| 27<br>28<br>29<br>30<br>31                   | Maternal_Overweight_Obesity | SMR02 | <b>1:</b> Overweight or Obese status<br><b>0:</b> Healthy or underweight status                                                                                                                                                | Adults with BMI $\geq 25$ classed as overweight or obese. BMI of girls aged 2 - 19 years old standardized using UK1990 growth reference values and z-score $\geq 4/3$ (91st centile) classed as overweight or obese.                                                                              |
| 32                                           | Age                         | SMR02 | Age of mother at delivery (in years)                                                                                                                                                                                           |                                                                                                                                                                                                                                                                                                   |
| 33<br>34<br>35<br>36<br>37                   | Parity                      | SMR02 | Total number of previous pregnancies                                                                                                                                                                                           | <a href="http://www.ndc.scot.nhs.uk/Dictionary-A-Z/Definitions/index.asp?Search=P&amp;ID=409&amp;Title=Previous%20Pregnancies">http://www.ndc.scot.nhs.uk/Dictionary-A-Z/Definitions/index.asp?Search=P&amp;ID=409&amp;Title=Previous Pregnancies</a>                                             |
| 38<br>39<br>40<br>41<br>42                   | Deprivation                 | SMR02 | Carstairs 2001 quintiles for Scotland                                                                                                                                                                                          | 1=least deprived; 5=most deprived                                                                                                                                                                                                                                                                 |

|                            |            |                                                                          |                                                                                                                                                                                                                                                                           |
|----------------------------|------------|--------------------------------------------------------------------------|---------------------------------------------------------------------------------------------------------------------------------------------------------------------------------------------------------------------------------------------------------------------------|
| Smoking_Status             | SMR02      | <b>1:</b> Yes<br><b>0:</b> No<br><b>Missing:</b> Not known               | <a href="http://www.ndc.scot.nhs.uk/Dictionary-A-Z/Definitions/index.asp?Search=S&amp;ID=456&amp;Title=Smoker During Pregnancy">http://www.ndc.scot.nhs.uk/Dictionary-A-Z/Definitions/index.asp?Search=S&amp;ID=456&amp;Title=Smoker During Pregnancy</a>                 |
| Multiple_births            | SMR02      | <b>1:</b> More than one birth this pregnancy<br><b>0:</b> Single birth   | <a href="http://www.ndc.scot.nhs.uk/Dictionary-A-Z/Definitions/index.asp?Search=N&amp;ID=349&amp;Title=Number of Births this Pregnancy">http://www.ndc.scot.nhs.uk/Dictionary-A-Z/Definitions/index.asp?Search=N&amp;ID=349&amp;Title=Number of Births this Pregnancy</a> |
| Multiple_births_in_NRS     | NRS Births | <b>1:</b> Multiple babies found for this mother's delivery in NRS Births | Multiple babies recorded in NRS Births but only a single baby recorded in SMR02                                                                                                                                                                                           |
| Previous_Caesarean_section | SMR02      | <b>1:</b> More than zero<br><b>0:</b> Zero                               | <a href="http://www.ndc.scot.nhs.uk/Dictionary-A-Z/Definitions/index.asp?Search=P&amp;ID=406&amp;Title=Previous Caesarean Sections">http://www.ndc.scot.nhs.uk/Dictionary-A-Z/Definitions/index.asp?Search=P&amp;ID=406&amp;Title=Previous Caesarean Sections</a>         |

## STROBE (Strengthening The Reporting of OBServational Studies in Epidemiology) Checklist

A checklist of items that should be included in reports of observational studies. You must report the page number in your manuscript where you consider each of the items listed in this checklist. If you have not included this information, either revise your manuscript accordingly before submitting or note N/A.

**Note:** An Explanation and Elaboration article discusses each checklist item and gives methodological background and published examples of transparent reporting. The STROBE checklist is best used in conjunction with this article (freely available on the Web sites of PLoS Medicine at <http://www.plosmedicine.org/>, Annals of Internal Medicine at <http://www.annals.org/>, and Epidemiology at <http://www.epidem.com/>). Information on the STROBE Initiative is available at [www.strobe-statement.org](http://www.strobe-statement.org).

| Section and Item     | Item No. | Recommendation                                                                                                                                                                                                                                                                                                                                                                                                                                                                 | Reported on Page No. |
|----------------------|----------|--------------------------------------------------------------------------------------------------------------------------------------------------------------------------------------------------------------------------------------------------------------------------------------------------------------------------------------------------------------------------------------------------------------------------------------------------------------------------------|----------------------|
| Title and Abstract   | 1        | (a) Indicate the study's design with a commonly used term in the title or the abstract                                                                                                                                                                                                                                                                                                                                                                                         |                      |
|                      |          | (b) Provide in the abstract an informative and balanced summary of what was done and what was found                                                                                                                                                                                                                                                                                                                                                                            |                      |
| <b>Introduction</b>  |          |                                                                                                                                                                                                                                                                                                                                                                                                                                                                                |                      |
| Background/Rationale | 2        | Explain the scientific background and rationale for the investigation being reported                                                                                                                                                                                                                                                                                                                                                                                           |                      |
| Objectives           | 3        | State specific objectives, including any prespecified hypotheses                                                                                                                                                                                                                                                                                                                                                                                                               |                      |
| <b>Methods</b>       |          |                                                                                                                                                                                                                                                                                                                                                                                                                                                                                |                      |
| Study Design         | 4        | Present key elements of study design early in the paper                                                                                                                                                                                                                                                                                                                                                                                                                        |                      |
| Setting              | 5        | Describe the setting, locations, and relevant dates, including periods of recruitment, exposure, follow-up, and data collection                                                                                                                                                                                                                                                                                                                                                |                      |
| Participants         | 6        | (a) <i>Cohort study</i> —Give the eligibility criteria, and the sources and methods of selection of participants. Describe methods of follow-up<br><br><i>Case-control study</i> —Give the eligibility criteria, and the sources and methods of case ascertainment and control selection. Give the rationale for the choice of cases and controls<br><br><i>Cross-sectional study</i> —Give the eligibility criteria, and the sources and methods of selection of participants |                      |
|                      |          | (b) <i>Cohort study</i> —For matched studies, give matching criteria and number of exposed and unexposed<br><br><i>Case-control study</i> —For matched studies, give matching criteria and the number of controls per case                                                                                                                                                                                                                                                     |                      |
| Variables            | 7        | Clearly define all outcomes, exposures, predictors, potential confounders, and effect modifiers. Give diagnostic criteria, if applicable                                                                                                                                                                                                                                                                                                                                       |                      |

| Section and Item             | Item No. | Recommendation                                                                                                                                                                                                                                                                                            | Reported on Page No. |
|------------------------------|----------|-----------------------------------------------------------------------------------------------------------------------------------------------------------------------------------------------------------------------------------------------------------------------------------------------------------|----------------------|
| Data Sources/<br>Measurement | 8*       | For each variable of interest, give sources of data and details of methods of assessment (measurement). Describe comparability of assessment methods if there is more than one group                                                                                                                      |                      |
| Bias                         | 9        | Describe any efforts to address potential sources of bias                                                                                                                                                                                                                                                 |                      |
| Study Size                   | 10       | Explain how the study size was arrived at                                                                                                                                                                                                                                                                 |                      |
| Quantitative Variables       | 11       | Explain how quantitative variables were handled in the analyses. If applicable, describe which groupings were chosen and why                                                                                                                                                                              |                      |
| Statistical Methods          | 12       | (a) Describe all statistical methods, including those used to control for confounding                                                                                                                                                                                                                     |                      |
|                              |          | (b) Describe any methods used to examine subgroups and interactions                                                                                                                                                                                                                                       |                      |
|                              |          | (c) Explain how missing data were addressed                                                                                                                                                                                                                                                               |                      |
|                              |          | (d) <i>Cohort study</i> —If applicable, explain how loss to follow-up was addressed<br><i>Case-control study</i> —If applicable, explain how matching of cases and controls was addressed<br><i>Cross-sectional study</i> —If applicable, describe analytical methods taking account of sampling strategy |                      |
|                              |          | (e) Describe any sensitivity analyses                                                                                                                                                                                                                                                                     |                      |
| <b>Results</b>               |          |                                                                                                                                                                                                                                                                                                           |                      |
| Participants                 | 13*      | (a) Report numbers of individuals at each stage of study—eg numbers potentially eligible, examined for eligibility, confirmed eligible, included in the study, completing follow-up, and analysed                                                                                                         |                      |
|                              |          | (b) Give reasons for non-participation at each stage                                                                                                                                                                                                                                                      |                      |
|                              |          | (c) Consider use of a flow diagram                                                                                                                                                                                                                                                                        |                      |
| Descriptive Data             | 14*      | (a) Give characteristics of study participants (eg demographic, clinical, social) and information on exposures and potential confounders                                                                                                                                                                  |                      |
|                              |          | (b) Indicate number of participants with missing data for each variable of interest                                                                                                                                                                                                                       |                      |
|                              |          | (c) <i>Cohort study</i> —Summarise follow-up time (eg, average and total amount)                                                                                                                                                                                                                          |                      |
| Outcome Data                 | 15*      | <i>Cohort study</i> —Report numbers of outcome events or summary measures over time                                                                                                                                                                                                                       |                      |
|                              |          | <i>Case-control study</i> —Report numbers in each exposure category, or summary measures of exposure                                                                                                                                                                                                      |                      |
|                              |          | <i>Cross-sectional study</i> —Report numbers of outcome events or summary measures                                                                                                                                                                                                                        |                      |



| Section and Item         | Item No. | Recommendation                                                                                                                                                                                               | Reported on Page No. |
|--------------------------|----------|--------------------------------------------------------------------------------------------------------------------------------------------------------------------------------------------------------------|----------------------|
| Main Results             | 16       | (a) Give unadjusted estimates and, if applicable, confounder-adjusted estimates and their precision (eg, 95% confidence interval). Make clear which confounders were adjusted for and why they were included |                      |
|                          |          | (b) Report category boundaries when continuous variables were categorized                                                                                                                                    |                      |
|                          |          | (c) If relevant, consider translating estimates of relative risk into absolute risk for a meaningful time period                                                                                             |                      |
| Other Analyses           | 17       | Report other analyses done—eg analyses of subgroups and interactions, and sensitivity analyses                                                                                                               |                      |
| <b>Discussion</b>        |          |                                                                                                                                                                                                              |                      |
| Key Results              | 18       | Summarise key results with reference to study objectives                                                                                                                                                     |                      |
| Limitations              | 19       | Discuss limitations of the study, taking into account sources of potential bias or imprecision. Discuss both direction and magnitude of any potential bias                                                   |                      |
| Interpretation           | 20       | Give a cautious overall interpretation of results considering objectives, limitations, multiplicity of analyses, results from similar studies, and other relevant evidence                                   |                      |
| Generalisability         | 21       | Discuss the generalisability (external validity) of the study results                                                                                                                                        |                      |
| <b>Other Information</b> |          |                                                                                                                                                                                                              |                      |
| Funding                  | 22       | Give the source of funding and the role of the funders for the present study and, if applicable, for the original study on which the present article is based                                                |                      |

\*Give information separately for cases and controls in case-control studies and, if applicable, for exposed and unexposed groups in cohort and cross-sectional studies.

**Once you have completed this checklist, please save a copy and upload it as part of your submission. DO NOT include this checklist as part of the main manuscript document. It must be uploaded as a separate file.**

# BMJ Open

## A cohort study of high maternal Body Mass Index and the risk of adverse pregnancy and delivery outcomes in Scotland

|                                 |                                                                                                                                                                                                                                                                                                                                                    |
|---------------------------------|----------------------------------------------------------------------------------------------------------------------------------------------------------------------------------------------------------------------------------------------------------------------------------------------------------------------------------------------------|
| Journal:                        | <i>BMJ Open</i>                                                                                                                                                                                                                                                                                                                                    |
| Manuscript ID                   | bmjopen-2018-026168.R2                                                                                                                                                                                                                                                                                                                             |
| Article Type:                   | Original research                                                                                                                                                                                                                                                                                                                                  |
| Date Submitted by the Author:   | 26-Aug-2019                                                                                                                                                                                                                                                                                                                                        |
| Complete List of Authors:       | Doi, Lawrence; University of Edinburgh, Scottish Collaboration for Public Health Research and Policy, School of Health in Social Science<br>Williams, Andrew James; University of Exeter<br>Marryat, Louise; University of Edinburgh, SCPHRP<br>Frank, John; University of Edinburgh, Scottish Collaboration for Public Health Research and Policy |
| <b>Primary Subject Heading</b>: | Obstetrics and gynaecology                                                                                                                                                                                                                                                                                                                         |
| Secondary Subject Heading:      | Epidemiology, Paediatrics, Public health, Reproductive medicine, Health policy                                                                                                                                                                                                                                                                     |
| Keywords:                       | OBSTETRICS, EPIDEMIOLOGY, PUBLIC HEALTH                                                                                                                                                                                                                                                                                                            |
|                                 |                                                                                                                                                                                                                                                                                                                                                    |

SCHOLARONE™  
Manuscripts

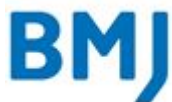

I, the Submitting Author has the right to grant and does grant on behalf of all authors of the Work (as defined in the below author licence), an exclusive licence and/or a non-exclusive licence for contributions from authors who are: i) UK Crown employees; ii) where BMJ has agreed a CC-BY licence shall apply, and/or iii) in accordance with the terms applicable for US Federal Government officers or employees acting as part of their official duties; on a worldwide, perpetual, irrevocable, royalty-free basis to BMJ Publishing Group Ltd ("BMJ") its licensees and where the relevant Journal is co-owned by BMJ to the co-owners of the Journal, to publish the Work in this journal and any other BMJ products and to exploit all rights, as set out in our [licence](#).

The Submitting Author accepts and understands that any supply made under these terms is made by BMJ to the Submitting Author unless you are acting as an employee on behalf of your employer or a postgraduate student of an affiliated institution which is paying any applicable article publishing charge ("APC") for Open Access articles. Where the Submitting Author wishes to make the Work available on an Open Access basis (and intends to pay the relevant APC), the terms of reuse of such Open Access shall be governed by a Creative Commons licence – details of these licences and which [Creative Commons](#) licence will apply to this Work are set out in our licence referred to above.

Other than as permitted in any relevant BMJ Author's Self Archiving Policies, I confirm this Work has not been accepted for publication elsewhere, is not being considered for publication elsewhere and does not duplicate material already published. I confirm all authors consent to publication of this Work and authorise the granting of this licence.

# A cohort study of high maternal Body Mass Index and the risk of adverse pregnancy and delivery outcomes in Scotland

Lawrence Doi<sup>1\*</sup>, Andrew James Williams<sup>2</sup>, Louise Marryat<sup>3,4</sup>, John Frank<sup>3,5</sup>

\*Correspondence: [larry.doi@ed.ac.uk](mailto:larry.doi@ed.ac.uk)

<sup>1</sup>Scottish Collaboration for Public Health Research and Policy, School of Health in Social Science, University of Edinburgh, Doorway 6, Old Medical School, Teviot Place, EH8 9AG, UK.

<sup>2</sup>European Centre for Environment and Human Health, College of Medicine and Health, University of Exeter, Knowledge Spa, Royal Cornwall Hospital, Truro, Cornwall TR1 3HD, UK.

<sup>3</sup>Farr Institute at Scotland, University of Edinburgh, Nine, Edinburgh BioQuarter, 9 Little France Road, Edinburgh EH16 4UX, UK.

<sup>4</sup>Centre for Clinical Brain Sciences, University of Edinburgh, Royal Edinburgh Hospital, Kennedy Tower, Morningside Park, Edinburgh EH10 5HF, UK.

<sup>5</sup>Usher Institute of Population Health Sciences and Informatics, University of Edinburgh, Doorway 1, Old Medical School, Teviot Place, EH8 9AG, UK.

## Abstract

**Objective:** To examine the association between high maternal weight status and complications during pregnancy and delivery.

**Setting:** Scotland

**Participants:** Data from 135,860 first time singleton deliveries in Scotland between 2008 and 2015 were used. Women with overweight and obesity were compared with women with normal weight. Associations between maternal body mass index and complications during pregnancy and delivery were evaluated.

**Outcome measures:** Gestational diabetes, gestational hypertension, pre-eclampsia, placenta praevia, placental abruption, induction of labour, elective and emergency caesarean sections, pre-term delivery, post-term delivery, low Apgar score, small for gestational age and large for gestational age.

**Results:** In the multivariable models controlling for potential covariates, we found that compared with women with normal weight, the odds of the following outcomes were significantly increased for women with overweight and obesity [overweight adjusted odds ratio; 95% confidence interval, followed by the same for women with obesity]: gestational hypertension [1.61; 1.49-1.74], [2.48; 2.30-2.68]; gestational diabetes [2.14; 1.86-2.46], [8.25; 7.33-9.30]; pre-eclampsia [1.46; 1.32-1.63] [2.07; 1.87-2.29] ]; labour induction [1.28; 1.23-1.33], [1.69; 1.62-1.76] and emergency caesarean section [1.82; 1.74-1.91], [3.14; 3.00-3.29].

**Conclusions:** Women with overweight and obesity in Scotland are at greater risk of adverse pregnancy and delivery outcomes. The risk of these conditions increases steadily with increasing body mass index. Health professionals should be

1  
2  
3 empowered and trained to deliver promising dietary and lifestyle interventions to  
4 women at risk of overweight and obesity prior to conception, and control excessive  
5 weight gain in pregnancy.  
6  
7  
8  
9  
10  
11  
12  
13  
14

### Strengths and limitations of this study

- This study used a large, retrospectively accessed but cohort-structured, national database covering all major maternal and neonatal outcomes in Scotland over eight recent years.
  - Analysis used whole study population with adequate adjustment for confounders to estimate impact of high maternal-weight status on each outcome.
  - All women with BMI of 30 kg/m<sup>2</sup> or more were considered as having obesity; it is likely that differentiating morbid obesity or obesity class II and III from obesity would have generated more precise risk estimates.
  - The completeness of the recording of BMI increased during the study period (2008 to 2015) from 69% to 98%. Using data from the earlier years when the BMI was missing more often might have biased the study sample if it was the case that BMI was not missing at random.
- 15  
16  
17  
18  
19  
20  
21  
22  
23  
24  
25  
26  
27  
28  
29  
30  
31  
32  
33  
34  
35  
36  
37  
38  
39  
40  
41  
42  
43  
44  
45  
46  
47  
48  
49  
50  
51  
52  
53  
54  
55  
56  
57  
58  
59  
60

## Introduction

The increasing global prevalence of overweight and obesity makes it more likely that a growing number of women with high body mass index (BMI) are becoming pregnant. High maternal BMI during pregnancy has adverse health implications for women (1,2) and predisposes the unborn child to adverse outcomes, including neonatal deaths, stillbirth, and admission to a neonatal unit (3,4,5). A recent international systematic review involving 38 studies found that even modest increases in maternal BMI were associated with increased risk of fetal death, stillbirth, and neonatal, perinatal, and infant death (6). Obesity in pregnancy can have health implications later in life for both mother and child. Among women this could lead to diabetes, heart disease and hypertension, whilst children are more prone to future obesity and hypertension (7). Wider service and economic consequences can also be seen including indirect burdens of illness and associated costs, in that women with high BMI also experience adverse birth outcomes such as neonatal death or stillbirth (8,9,10). Such individuals may require support from family and friends as well as bereavement support services within the community. There are also substantial healthcare cost implications for infants who may require medical attention. For example, a recent study examining infant health utilisation and costs on the NHS in the UK of infants born to women with overweight or obesity found that total mean additional resource cost for infants born to women who are overweight was £65.13, and £1138.11 for infants born to women who are obese (11).

1  
2  
3 Maternal weights are currently high in Scotland: a recent study reported that 31.5%  
4 of mothers were overweight and a further 23.6% were affected by obesity (12).  
5  
6 Another study examining the impact of maternal BMI on clinical complications,  
7  
8 inpatient admissions, and additional short-term costs to the NHS in Scotland  
9  
10 revealed that maternal BMI influences maternal and neonatal morbidity, the number  
11  
12 and duration of maternal and neonatal admissions, and health service costs (13).  
13  
14 However, no recent study in Scotland has investigated the effect of high maternal  
15  
16 BMI on the risk of pregnancy and delivery outcomes. The aim of this study was to  
17  
18 examine the associations between high maternal BMI and complications during  
19  
20 pregnancy and delivery in Scotland. Understanding of these associations can  
21  
22 highlight areas where prevention strategies could be targeted.  
23  
24  
25  
26  
27  
28  
29  
30

## 31 **Methods**

### 32 ***Study population and data sources***

33  
34  
35 This retrospective cohort study used data from 135,860 first time mothers who gave  
36  
37 birth to only one child in Scotland between January 2008 and December 2015. The  
38  
39 women and infants were identified within three electronic medical record databases:  
40  
41 the Scottish Morbidity Record (SMR) 01 and 02 and Scottish Birth Record (SBR).  
42  
43 SMR01 is generated for patients receiving inpatient or day care in the General or  
44  
45 Acute specialties, whilst SMR02 is generated for patients receiving inpatient or day  
46  
47 care in the Obstetric Specialties. The SBR records all of a baby's neonatal care in  
48  
49 Scotland. The outcome variables are recorded in these databases according the  
50  
51 World Health Organization's International Classification of Diseases, Tenth Revision  
52  
53 (ICD-10). Further description of the content of these databases is available (14) and  
54  
55  
56  
57  
58  
59  
60



in the web-appendix. The study was designed as a clinical audit so did not require approval from a Research Ethics Committee. However, approval was obtained from the Public Benefit and Privacy Panel via the national Electronic Data Research and Innovation Service to use the anonymised data collected by these registries.

### ***Patient and public involvement***

Patients were not involved in the design, analysis and interpretation of this study.

### ***Exposure variable***

More than 80% of pregnant women in Scotland present themselves for antenatal care during the first trimester of their pregnancy. Height and weight are measured by the midwife at the first antenatal visit, typically before 12 weeks of pregnancy. Body mass index was calculated using the formula weight (kg)/height (m<sup>2</sup>). BMI completeness was 69% in 2008 but this increased gradually to 87% in 2011 when recording of weight and height became mandatory. By 2015 BMI completeness was 98%. Women were categorised into three BMI groups as described in Table 1.

Table 1. Adult BMI definitions used

| <b>Variable</b>        | <b>Category</b> | <b>BMI Definition</b>                          |
|------------------------|-----------------|------------------------------------------------|
| Maternal weight status | Normal          | <25 kg/m <sup>2</sup>                          |
|                        | Overweight      | ≥25 kg/m <sup>2</sup> to <30 kg/m <sup>2</sup> |
|                        | Obesity         | ≥30 kg/m <sup>2</sup>                          |

### ***Outcomes***

Outcome measures included were maternal or pregnancy complications such as gestational diabetes, gestational hypertension and pre-eclampsia (high blood pressure and protein in urine). Conditions affecting delivery or delivery complications

1  
2  
3 studied were placenta praevia (when a baby's placenta partially or totally covers the  
4 mother's cervix), placental abruption (when the placenta separates early from the  
5 uterus before childbirth), induction of labour, caesarean delivery (includes elective  
6 and emergency caesarean sections), pre-term delivery (defined as less than 37  
7 weeks of gestation), post-term delivery (more than 42 weeks of gestation), low Apgar  
8 score (less than "7" at 5 minutes), small for gestational age (SGA), and large for  
9 gestational age (LGA). SGA were infants with birthweight of  $\leq 10^{\text{th}}$  percentile for  
10 gestational age according to UK1990 growth reference curve (15,16), and those with  
11 LGA were infants with birth weight  $\geq 90^{\text{th}}$  percentile.  
12  
13  
14  
15  
16  
17  
18  
19  
20  
21  
22  
23

### 24 **Covariates**

25  
26  
27 Maternal age at delivery, smoking during pregnancy and Carstairs 2001 quintiles for  
28 Scotland for the postcode sector of the mother's residence at birth, were considered  
29 as potentially confounding variables and were included as covariates in the adjusted  
30 analyses. Table 2 describes the covariates used in this study by maternal weight  
31 status among singleton (a pregnancy with one fetus as opposed to twins or  
32 multiples) first-time pregnancies. The data in Table 2 show the numbers of women  
33 who had data on age, deprivation and maternal smoking. This means that the total  
34 number of women shown is slightly larger than the number of women analysed as  
35 there were women missing some outcome data.  
36  
37  
38  
39  
40  
41  
42  
43  
44  
45  
46  
47  
48  
49  
50  
51  
52  
53  
54  
55  
56  
57

58 Table 2. Maternal characteristics among normal weight, overweight and obese  
59 women<sup>+</sup> (singleton, first pregnancies)  
60

|                                              | Normal*    |      | Overweight* |      | Obese*     |      |
|----------------------------------------------|------------|------|-------------|------|------------|------|
|                                              | N = 73,130 |      | N = 36,992  |      | N = 25,738 |      |
|                                              | N          | %    | N           | %    | N          | %    |
| <b>Maternal age (y)</b>                      |            |      |             |      |            |      |
| 20-24                                        | 19,874     | 27.2 | 9,368       | 25.3 | 7,016      | 27.3 |
| 25-29                                        | 24,443     | 33.4 | 12,174      | 32.9 | 8,475      | 32.9 |
| 30-34                                        | 20,880     | 28.6 | 10,522      | 28.4 | 6,922      | 26.9 |
| 35-39                                        | 7,933      | 10.9 | 4,928       | 13.3 | 3,325      | 12.9 |
| <b>Carstairs 2001 quintiles for Scotland</b> |            |      |             |      |            |      |
| Q1 (Least deprived)                          | 14,695     | 20.1 | 6,785       | 18.3 | 3,870      | 15.0 |
| Q2                                           | 13,820     | 18.9 | 6,851       | 18.5 | 4,639      | 18.0 |
| Q3                                           | 14,581     | 19.9 | 7,549       | 20.4 | 5,117      | 19.9 |
| Q4                                           | 15,338     | 21.0 | 7,994       | 21.6 | 6,079      | 23.6 |
| Q5 (Most deprived)                           | 14,696     | 20.1 | 7,813       | 21.1 | 6,033      | 23.4 |
| <b>Maternal smoking in pregnancy</b>         |            |      |             |      |            |      |
| No                                           | 62,439     | 85.4 | 31,806      | 86.0 | 21,604     | 83.9 |
| Yes                                          | 10,691     | 14.6 | 5,186       | 14.0 | 4,134      | 16.1 |

\*Maternal weight status at first antenatal visit

+Figures show women who had complete data on age, deprivation and maternal smoking

### Data analysis

Using Stata 14 (17), logistic regression was used to calculate odds ratios (ORs). BMI groups with overweight and obesity were compared with the normal BMI group (the reference population). A confidence interval (CI) of 95% was produced for all ORs.

The analysis of the outcomes proceeded in a systematic approach.

For the first group of outcomes (gestational diabetes, hypertension and pre-eclampsia) the models were adjusted for confounders, and the two other conditions that were not the dependent variable as these conditions can co-occur. This approach was taken throughout the analysis, adjusting for conditions, which precede or occur contemporarily with the outcome being examined as the dependent variable. Unless, the outcomes could not co-occur such as pre-term and post-term, SGA and LGA, or method of delivery (induction, elective or emergency c-section).

## Results

1  
2  
3  
4  
5  
6  
7  
8  
9  
10  
11  
12  
13  
14  
15  
16  
17  
18  
19  
20  
21  
22  
23  
24  
25  
26  
27  
28  
29  
30  
31  
32  
33  
34  
35  
36  
37  
38  
39  
40  
41  
42  
43  
44  
45  
46  
47  
48  
49  
50  
51  
52  
53  
54  
55  
56  
57  
58  
59  
60

Within our study population 53.8 % of pregnant women were categorised as normal weight, 27.3% overweight and 18.9% were affected by obesity. The socio-demographic characteristics of the women in the three BMI categories are presented in Table 2. Maternal smoking prevalence was slightly higher among women with obesity than in women with normal weight or overweight. Among the women who were overweight, 21.1% were from the most deprived and 18.3% were from the least deprived group. However, the difference in social deprivation was more marked within women with obesity. Among this group, 23.4% were from the most deprived group whilst 15.0% were from the least deprived group.

Table 3 shows odd ratios for pregnancy and delivery complications, among women who were overweight or obese, and with singleton first-time births. The risk of the three conditions occurring during pregnancy increased steadily with increasing BMI. For example, compared to the normal BMI group, the risk of gestational diabetes was 2.14 (95% CI: 1.86-2.46) but among women who were obese the risk increased to 8.25 (95% CI: 7.33 – 9.30). Relative to women who were of normal weight, the adjusted OR of pre-eclampsia for women who were overweight was 1.46 (95% CI: 1.32-1.62) and 2.07 (95% CI: 1.87-2.29) for women who were obese.

Table 3. Pregnancy and delivery complications among normal, overweight and obese singleton women

|                                              | Total sample | Normal N (%)  | Cases (%)     | Overweight N (%) | Cases (%)     | Adjusted OR* (95% CI) | Obese N (%)   | Cases (%)    | Adjusted OR* (95% CI) |
|----------------------------------------------|--------------|---------------|---------------|------------------|---------------|-----------------------|---------------|--------------|-----------------------|
| <b>Conditions occurring during pregnancy</b> |              |               |               |                  |               |                       |               |              |                       |
| Gestational hypertension                     | 132,899      | 71,538 (53.8) | 1,550 (2.2)   | 36,188 (27.2)    | 1,239 (3.4)   | 1.61 (1.49, 1.74)     | 25,173 (18.9) | 1,275 (5.1)  | 2.48 (2.30, 2.68)     |
| Gestational diabetes                         | 132,899      | 71,538 (53.8) | 377 (0.5)     | 36,188 (27.2)    | 418 (1.2)     | 2.14 (1.86, 2.46)     | 25,173 (18.9) | 1,082 (4.3)  | 8.25 (7.33, 9.30)     |
| Pre-eclampsia                                | 132,899      | 71,538 (53.8) | 906 (1.3)     | 36,188 (27.2)    | 664 (1.8)     | 1.46 (1.32, 1.62)     | 25,173 (18.9) | 640 (2.5)    | 2.07 (1.87, 2.29)     |
| <b>Conditions affecting delivery</b>         |              |               |               |                  |               |                       |               |              |                       |
| Placenta praevia <sup>1</sup>                | 132,212      | 71,172 (53.8) | 102 (0.1)     | 36,001 (27.2)    | 66 (0.2)      | 1.23 (0.90, 1.68)     | 25,039 (18.9) | 30 (0.1)     | 0.81 (0.54, 1.22)     |
| Placental abruption <sup>1</sup>             | 132,212      | 71,172 (53.8) | 133 (0.2)     | 36,001 (27.2)    | 55 (0.2)      | 0.81 (0.59, 1.11)     | 25,039 (18.9) | 38 (0.2)     | 0.76 (0.53, 1.10)     |
| Small for gestational age <sup>1</sup>       | 132,212      | 71,172 (53.8) | 6,664 (9.4)   | 36,001 (27.2)    | 2,645 (7.4)   | 0.76 (0.72, 0.80)     | 25,039 (18.9) | 1,726 (6.9)  | 0.69 (0.65, 0.73)     |
| Large for gestational age <sup>1</sup>       | 132,212      | 71,172 (53.8) | 17,852 (25.1) | 36,001 (27.2)    | 10,879 (30.2) | 1.30 (1.26, 1.33)     | 25,039 (18.9) | 8,575 (34.3) | 1.57 (1.52, 1.62)     |
| Pre-term                                     | 132,212      | 71,172 (53.8) | 4,295 (6.0)   | 36,001 (27.2)    | 2,231 (6.2)   | 1.02 (0.96, 1.07)     | 25,039 (18.9) | 1,725 (6.9)  | 1.11 (1.05, 1.18)     |
| Post-term <sup>2</sup>                       | 78,074       | 43,486 (55.7) | 31 (0.1)      | 20,973 (26.9)    | 24 (0.1)      | 1.57 (0.93, 2.68)     | 13,615(17.4)  | 14 (0.1)     | 1.47 (0.78, 2.77)     |
| <b>Delivery</b>                              |              |               |               |                  |               |                       |               |              |                       |
| Induction of labour                          | 92,967       | 53,617 (57.7) | 13,417 (25.0) | 24,342 (26.2)    | 7,420 (30.5)  | 1.28 (1.23, 1.33)     | 15,008 (16.1) | 5,712 (38.1) | 1.69 (1.62, 1.76)     |
| Caesarean section                            | 90,183       | 51,798 (57.4) | 11,598 (22.4) | 23,827 (26.4)    | 6,905 (29.0)  | 1.34 (1.29, 1.39)     | 14,558 (16.1) | 5,262 (36.2) | 1.80 (1.73, 1.88)     |
| Emergency caesarean section                  | 80,938       | 45,715 (56.5) | 5,515 (12.1)  | 21,397 (26.4)    | 4,475 (20.9)  | 1.82 (1.74, 1.91)     | 13,826 (17.1) | 4,530 (32.8) | 3.14 (3.00, 3.29)     |
| Apgar score                                  | 129,773      | 70,012 (54.0) | 12,583 (18.0) | 35,307 (27.2)    | 6,125 (17.4)  | 0.95 (0.92, 0.99)     | 24,454 (18.8) | 4,342 (17.8) | 0.96 (0.93, 1.00)     |

OR = Odd Ratio; CI = Confidence Interval; NICU = Neonatal Intensive Care Unit

\*Adjusted for maternal age, deprivation and smoking in pregnancy

<sup>1</sup>80 post-term births were excluded from these models as none of them experienced the outcome being estimated

<sup>2</sup>No participants in the study had placenta praevia, placental abruption or had small or large for gestational age babies and were post-term and therefore 45,957 participants were dropped from this analysis

1  
2  
3  
4  
5  
6 Regarding conditions affecting delivery, the odds ratio of placenta praevia were not  
7  
8 statistically significant different for both women who were overweight (OR 1.23,  
9  
10 95%CI: 0.90-1.68) and obese (OR 0.81, 95%CI: 0.54-1.22) compared with women  
11  
12 with normal weight. The odds of experiencing placental abruption were also not  
13  
14 significantly different among the different BMI categories.  
15  
16

17  
18 In contrast with the normal BMI group, births to women who were overweight and  
19  
20 obese were associated with decreased risk of small-for-gestational age, ORs 0.76  
21  
22 (95% CI: 0.72-0.80) and 0.69 (95% CI: 0.65-0.73) respectively. However, the  
23  
24 prevalence of large-for-gestational age increased among women with overweight,  
25  
26 OR of 1.30 (95%CI: 1.26-1.33) and women with obesity, OR 1.57 (95% CI: 1.52-  
27  
28 1.62) compared with women of normal weight.  
29  
30  
31

32  
33  
34 The chance of induction of labour and caesarean section, either elective or  
35  
36 emergency increased with increasing BMI. Women who were overweight had odds  
37  
38 of 1.34 (95% CI: 1.29-1.39) higher for having an elective Caesarean section and  
39  
40 higher odds (OR 1.82, 95% CI: 1.74-1.91) for undergoing emergency Caesarean  
41  
42 section, compared with women of normal weight. The corresponding ORs for women  
43  
44 with obesity were 1.80 (95% CI: 1.73-1.88) and 3.14 (95% CI: 3.00-3.29). Being  
45  
46 overweight or obese was associated with reduced risk of low Apgar score. This was  
47  
48 barely significant for women who were overweight (OR 0.95 , 95% CI: 0.92-0.99 )  
49  
50 and not obese (OR 0.96, 95% CI: 0.93-1.00).  
51  
52  
53  
54  
55  
56  
57  
58  
59  
60

## Discussion

In this large, retrospective cohort study, we found that overweight or obesity during pregnancy increased the risk of several adverse pregnancy and delivery complications. Some earlier studies have also found similar findings. Aside from obesity, we also examined overweight because in most populations, a greater number of women are overweight rather than obese, so it is important to also understand the impact of overweight on pregnancy and neonatal outcomes.

In terms of the association between high maternal BMI and conditions that occur during pregnancy, we found that the risk of all the conditions considered (gestational hypertension, gestational diabetes and pre-eclampsia) increased steadily with increasing BMI, which is in line with similar studies (2,3,4). A study compared women of normal weight to women who were morbidly obese (BMI greater than 40), and also found that there was an increased risk of pre-eclampsia (OR 4.82; 95% CI: 4.04-5.74) (3). Our study also found that, aside from heightened pre-eclampsia risk for women with obesity, being overweight was also significantly associated with this outcome, albeit to a lesser degree. A meta-analysis of the association between maternal BMI and the risk of pre-eclampsia showed that the risk doubled with each 5-7 kg/m<sup>2</sup> increase in pre-pregnancy BMI (18). It is evident that the risk of pre-eclampsia increases with the degree of weight gain; therefore preventative strategies should be focussed on getting women, especially those already overweight, to reduce weight prior to conception. Weight loss in pregnancy requires careful management in order to avoid unintended consequences (19). Nevertheless, women often engage with health professionals during pregnancy; therefore dietary and lifestyle interventions such as physical activity, which have been shown by reviews

1  
2  
3 and meta-analyses (19,20) to reduce gestational weight gain and improve outcomes  
4  
5 for both mother and baby, could be provided to them.  
6  
7  
8  
9

10 Generally, rates of Caesarean delivery have increased significantly across many  
11 developed countries in recent years (21). Our study found that women with  
12 overweight and obesity showed an increased risk of Caesarean delivery (both  
13 elective and emergency) compared to normal-weight women, but we note that the  
14 overall frequency of Caesarean delivery across our obstetric population seems quite  
15 high, compared with a previous Swedish study (3). Possible reasons could be that  
16 Caesarean delivery is probably less risky now, due to advances in medical science,  
17 which facilitate accurate monitoring of the progress of labour and fetal intra-partum  
18 condition (22). It is also possible that health professionals in Scotland are probably  
19 intervening early with regards to problems in labour among women with overweight  
20 or obesity, in order to reduce fetal distress, and its worst outcomes. Nevertheless,  
21 this is quite concerning for Scotland, which has invested in programmes aimed at  
22 promoting natural birth, such as Keeping Childbirth Natural and Dynamic (KCND).  
23 The KCND is a maternity care programme introduced by the Scottish Government  
24 with the aim of maximising opportunities for women to have as natural a birth  
25 experience as possible, reduce unnecessary interventions in low-risk pregnancy and  
26 childbirth, and to provide women-centred care (23,24,25). The early intervention in  
27 pregnancy may also explain the reduced risk of low Apgar score for infants born to  
28 women with overweight and obesity. It is likely that these women are may receive  
29 increased monitoring, which means issues can be identified and managed earlier, to  
30 reduce any fetal distress in labour.  
31  
32  
33  
34  
35  
36  
37  
38  
39  
40  
41  
42  
43  
44  
45  
46  
47  
48  
49  
50  
51  
52  
53  
54  
55  
56  
57  
58  
59  
60



1  
2  
3 Adiposity increases risk of large-for-gestational age and macrosomia; in this study,  
4 we found that births to women with overweight and obesity were associated with an  
5 increased risk of large-for-gestational age infants compared with women of normal  
6 weight. Excess weight in pregnancy may shift the entire birth weight distribution  
7 upwards, perhaps through hormonal mechanisms that operate at lower levels than in  
8 full-blown cases of macrosomia in infants of diabetic mothers.  
9  
10  
11  
12  
13  
14  
15  
16  
17  
18

### 19 ***Strengths and limitations***

20  
21 This study used a large, retrospectively accessed but cohort-structured, national  
22 database covering several maternal and neonatal outcomes. The analysis used  
23 whole study population with adequate adjustment for confounders to estimate impact  
24 of high maternal-weight status on each outcome. We restricted the analysis to only  
25 single births and first pregnancies to ensure that the births in the sample are  
26 relatively independent. The dataset we used combined underweight and normal  
27 weight women as normal BMI group. Using this as reference group might have  
28 strengthened the association between high maternal BMI and the pregnancy and  
29 neonatal outcomes considered. However, only a very small number of women are  
30 underweight during pregnancy in Scotland in recent years. Also, some studies  
31 differentiate between different obesity categories, but in this study all women with  
32 BMI of 30 or more were considered as having obesity. It is likely that differentiating  
33 morbid obesity, or obesity class II and III from women with obesity, would have  
34 generated additional insight. The completeness of the recording of BMI increased  
35 during the study period (2008 to 2015) from 69% to 98%. Using data from the earlier  
36 years, when the BMI was missing more often, might have biased the study sample if  
37 BMI was not missing at random. The study included control for a limited set of  
38  
39  
40  
41  
42  
43  
44  
45  
46  
47  
48  
49  
50  
51  
52  
53  
54  
55  
56  
57  
58  
59  
60

1  
2  
3 confounders and inclusion of other relevant confounders could have strengthened  
4 the analysis. For example, variables such as ethnicity, previous caesarean sections,  
5 time of birth were not available in dataset, which we accessed. Also, we could not  
6 use neonatal outcomes such as stillbirth, neonatal death and congenital anomaly  
7 because these outcomes are not completely ascertained in the dataset we used.  
8  
9  
10  
11  
12  
13  
14  
15  
16

## 17 Conclusion

18  
19  
20 This study has shown that women who were overweight and obese in Scotland are  
21 at greater risk of several pregnancy and delivery complications including gestational  
22 hypertension, gestational diabetes, pre-eclampsia, labour induction and Caesarean  
23 delivery. The risk of these conditions increases steadily with increasing BMI. Health  
24 professionals should be empowered and trained to deliver promising dietary and  
25 lifestyle interventions to women at risk of overweight and obesity prior to conception,  
26 and control excessive weight gain in pregnancy.  
27  
28  
29  
30  
31  
32  
33  
34  
35

## 36 References

- 37  
38 1. Rooney BL, Schauburger CW. Excess pregnancy weight gain and long-term  
39 obesity: one decade later. *Obstet Gynecol* 2002; **100(2)**: 245-252.
- 40  
41 2. Kumari P, Gupta M, Kahlon P, Malviya S. Association between high maternal  
42 body mass index and fetomaternal Outcome. *J Obes Metab Res* 2014; **1**:  
43 143-148.
- 44  
45 3. Cedergren MI. Maternal morbid obesity and the risk of adverse pregnancy  
46 outcome. *Obstetricians and Gynecologists* 2004; **103**: 219-224.
- 47  
48 4. Scott-Pillai R, Spence D, Cardwell C, Hunter A, Holmes V. The impact of body  
49 mass index on maternal and neonatal outcomes: a retrospective study in a  
50 UK obstetric population, 2004–2011. *BJOG* 2013; **120**: 932–939.  
51  
52  
53  
54  
55  
56  
57  
58  
59  
60

- 1  
2  
3 5. Rahman MM, Abe SK, Kanda M, Narita S, Rahman MS, Bilano V, Ota E,  
4  
5 Gilmour S, Shibuya K. Maternal body mass index and the risk of birth and  
6  
7 maternal health outcomes in low- and middle-income countries: a systematic  
8  
9 review and meta-analysis. *Obesity Reviews* 2015; **16**: 758–770.
- 10  
11  
12 6. Aune D, Saugstad OD, Henriksen T, Tonstad S. Maternal body mass index  
13  
14 and the risk of fetal death, stillbirth, and infant death: a systematic review and  
15  
16 meta-analysis. *JAMA* 2014; **311**(15):1536-46.
- 17  
18  
19 7. Leddy MA, Power ML, Schulkin J. The impact of maternal obesity on maternal  
20  
21 and fetal health. *Rev Obstet Gynecol.* 2008;**1**(4):170–178.
- 22  
23  
24 8. Heslehurst N, Lang R, Rankin J, Wilkinson J, Summerbell CD. Obesity in  
25  
26 pregnancy: a study of the impact of maternal obesity on NHS maternity  
27  
28 services. *BJOG* 2007; **114**(3): 334-342.
- 29  
30  
31 9. Furness PJ, McSeveny K, Arden MA, Garland C, Dearden AM, Soltani H.  
32  
33 Maternal obesity support services: a qualitative study of the perspectives of  
34  
35 women and midwives. *BMC Pregnancy and Childbirth* 2011; **11**: 69.
- 36  
37  
38 10. Lenoir-Wijnkoop I, van der Beek EM, J Garssen, Nuijten MJC, Uauy RD.  
39  
40 Health economic modeling to assess short-term costs of maternal overweight,  
41  
42 gestational diabetes, and related macrosomia – a pilot evaluation. *Front*  
43  
44 *Pharmacol* 2015; **6**:103. doi: 10.3389/fphar.2015.00103.
- 45  
46  
47 11. Morgan KL, Rahman MA, Hill RA, et al. Obesity in pregnancy: infant health  
48  
49 service utilisation and costs on the NHS. *BMJ Open* 2015;5:e008357.  
50  
51 doi:10.1136/bmjopen-2015- 008357.
- 52  
53  
54 12. Doi L, Williams AJ, Frank J. How has child growth around adiposity rebound  
55  
56 altered in Scotland since 1990 and what are the risk factors for weight gain  
57  
58  
59  
60

- 1  
2  
3 using the Growing Up in Scotland birth cohort 1? *BMC Public Health* 2016;  
4  
5 **16**: 1081.  
6  
7  
8 13. Denison FC, Norwood P, Bhattacharya S, Duffy A, Mahmood T, Morris C,  
9  
10 Raja EA, Norman JE, Lee AJ, Scotland G. Association between maternal  
11  
12 body mass index during pregnancy, short-term morbidity, and increased  
13  
14 health service costs: a population-based study. *BJOG* 2014; **121**:72–82.  
15  
16  
17 14. Information Service Division (2018). Scottish birth record.  
18  
19 [http://www.ndc.scot.nhs.uk/Data-Dictionary/SMR-Datasets/Scottish-Birth-](http://www.ndc.scot.nhs.uk/Data-Dictionary/SMR-Datasets/Scottish-Birth-Record/)  
20  
21 [Record/](http://www.ndc.scot.nhs.uk/Data-Dictionary/SMR-Datasets/Scottish-Birth-Record/)  
22  
23  
24 15. Cole TJ, Freeman JV, Preece MA. Body mass index reference curves for the  
25  
26 UK, 1990. *Arch Dis Child* 1995; **73(1)**: 25–29.  
27  
28  
29 16. Freeman JV, Cole TJ, Chinn S, Jones PRM, White EM, Preece MA. Cross-  
30  
31 sectional stature and weight reference curves for the UK 1990. *Arch Dis Child*  
32  
33 1995; **73(1)**:17–24.  
34  
35  
36 17. StataCorp. Stata statistical software: release 14. College Station: StataCorp  
37  
38 LP; 2015.  
39  
40  
41 18. O'Brien TE, Ray JG, Chan WS. Maternal body mass index and the risk of  
42  
43 preeclampsia: A systematic overview. *Epidemiology* 2003; **14**: 368-374.  
44  
45  
46 19. Shieh C, Cullen DL, Pike C, Pressler SJ. Intervention strategies for preventing  
47  
48 excessive gestational weight gain: systematic review and meta-analysis.  
49  
50 *Obesity Reviews* 2018; doi: 10.1111/obr.12691.  
51  
52  
53 20. Thangaratinam S, Rogozinska E, Jolly K, Glinkowski S, Roseboom T,  
54  
55 Tomlinson JW, Kunz R, Mol BW, Coomarasamy A, Khan KS. Effects of  
56  
57 interventions in pregnancy on maternal weight and obstetric outcomes: Meta-  
58  
59 analysis of randomised evidence. *BMJ*. 2012; **344**: e2088.  
60

- 1  
2  
3 21. Althabe F, Sosa C, Belizán JM, Gibbons L, Jacquerioz F, Bergel E. Cesarean  
4 section rates and maternal and neonatal mortality in low-, medium-, and high-  
5 income countries: an ecological study. *Birth* 2006; **33(4)**: 270-277.  
6  
7  
8  
9  
10 22. Rezaie M, Shahoe R, Shahghebi S. The effect of maternal body mass index  
11 on the delivery route in nulliparous women. *Journal of Public Health and*  
12 *Epidemiology* 2013; **5(8)**: 346-350.  
13  
14  
15  
16  
17 23. Health Improvement Scotland (2009). Pathways for maternity care.  
18 <http://www.healthcareimprovementscotland.org/default.aspx?page=12536>  
19  
20  
21 24. Abhyankar P, Cheyne H, Maxwell M, McCourt C. A realist evaluation of a  
22 normal birth programme. *Evidence Based Midwifery* 2013;  
23 [https://www.rcm.org.uk/learning-and-career/learning-and-research/ebm-](https://www.rcm.org.uk/learning-and-career/learning-and-research/ebm-articles/a-realist-evaluation-of-a-normal-birth)  
24 [articles/a-realist-evaluation-of-a-normal-birth](https://www.rcm.org.uk/learning-and-career/learning-and-research/ebm-articles/a-realist-evaluation-of-a-normal-birth).  
25  
26  
27  
28  
29  
30 25. Cheyne H, Abhyankar P, McCourt C. Empowering change: realist evaluation  
31 of a Scottish Government programme to support normal birth. *Midwifery* 2013;  
32 **29**: 1110–1121.  
33  
34  
35  
36  
37  
38  
39  
40  
41  
42  
43  
44  
45  
46  
47  
48  
49  
50  
51  
52  
53  
54  
55  
56  
57  
58  
59  
60

## Funding

This work was funded by the SCPHRP core grant from the Medical Research Council (Grant Number MR/K023209/1) and the Chief Scientist Office of Scotland.

AJW is supported by the European Centre for Environment and Human Health, University of Exeter. LM is supported by the Farr Institute @ Scotland, which is supported by a 10-funder consortium: Arthritis Research UK, the British Heart

1  
2  
3 Foundation, Cancer Research UK, the Economic and Social Research Council, the  
4  
5 Engineering and Physical Sciences Research Council, the Medical Research  
6  
7 Council, the National Institute of Health Research, the National Institute for Social  
8  
9 Care and Health Research (Welsh Assembly Government), the Chief Scientist Office  
10  
11 (Scottish Government Health Directorates), (MRC Grant No: MR/K007017/1). The  
12  
13 funders played no role in the conceptualisation or realisation of the research and no  
14  
15 role in the decision to submit it for publication.  
16  
17  
18  
19  
20  
21

### 22 **Competing interest**

23  
24  
25 The authors declare that they have no competing interests.  
26  
27  
28  
29

### 30 **Data sharing**

31  
32 Data used was categorised as confidential data release.  
33  
34  
35  
36

### 37 **Acknowledgements**

38  
39 The authors are grateful to the Electronic Data Research and Innovation Service of  
40  
41 the Information Services Division, NHS National Services Scotland for providing the  
42  
43 data used in this paper.  
44  
45  
46  
47  
48

### 49 **Authors' contributions**

50  
51 LD, AJW and JF conceived the original idea for the study and obtained the data.  
52  
53 AJW led the statistical analysis with support from LD, LM and JF. LD wrote the first  
54  
55 draft of the paper and all authors revised successive drafts and approved the final  
56  
57 manuscript.  
58  
59  
60

## Web-appendix: Description of data fields used in the study

| Variable Name       | Database Source      | Variable Description/Values                                                                                                                                                                                                                       | Notes                                                                                                                                                                                                                       |
|---------------------|----------------------|---------------------------------------------------------------------------------------------------------------------------------------------------------------------------------------------------------------------------------------------------|-----------------------------------------------------------------------------------------------------------------------------------------------------------------------------------------------------------------------------|
| Mother_ID           | N/A - study specific | Unique mother identifier                                                                                                                                                                                                                          | 1516-0613/' followed by an anonymous identifier                                                                                                                                                                             |
| Baby_ID             | N/A - study specific | Unique baby identifier                                                                                                                                                                                                                            | Mother_ID followed by delivery sequence number followed by a baby sequence number. The baby sequence number for multiple babies from same delivery not necessarily in correct order due to missing CHI numbers.             |
| Delivery_Seq_No     | N/A - study specific | Delivery sequence number of mother                                                                                                                                                                                                                |                                                                                                                                                                                                                             |
| Gest_Diabetes       | SMR02                | <b>1:</b> Yes, Gestational diabetes (diagnosed during this pregnancy)<br><b>0:</b> Yes, Pre-existing diabetes (diagnosed before pregnancy) & No (no diabetes during this pregnancy)<br><b>Missing:</b> Yes, Time of diagnosis unknown & Not Known | <a href="http://www.ndc.scot.nhs.uk/Dictionary-A-Z/Definitions/index.asp?Search=D&amp;ID=214&amp;Title=Diabetes">http://www.ndc.scot.nhs.uk/Dictionary-A-Z/Definitions/index.asp?Search=D&amp;ID=214&amp;Title=Diabetes</a> |
| Gest_Hypertension   | SMR02/SMR01          | <b>1:</b> ICD 10 code O13.X<br><b>0:</b> All other codes                                                                                                                                                                                          | Flagged codes cover gestational hypertension                                                                                                                                                                                |
| Pre_Eclampsia       | SMR02/SMR01          | <b>1:</b> ICD 10 code O14._<br><b>0:</b> All other codes                                                                                                                                                                                          | Flagged codes cover pre-eclampsia                                                                                                                                                                                           |
| Placental_Abruption | SMR02/SMR01          | <b>1:</b> ICD 10 code O45._<br><b>0:</b> All other codes                                                                                                                                                                                          | Flagged codes cover placental abruption                                                                                                                                                                                     |
| Placental_Praevia   | SMR02/SMR01          | <b>1:</b> ICD 10 code O44._<br><b>0:</b> All other codes                                                                                                                                                                                          | Flagged codes cover placenta praevia                                                                                                                                                                                        |

|                    |       |                                                                                                                                  |                                                                                                                                                                                                                                                                             |
|--------------------|-------|----------------------------------------------------------------------------------------------------------------------------------|-----------------------------------------------------------------------------------------------------------------------------------------------------------------------------------------------------------------------------------------------------------------------------|
| Caesarean_Delivery | SMR02 | <b>1:</b> Elective (planned) caesarean section & Emergency and unspecified caesarean section<br><b>0:</b> All other codes        | <a href="http://www.ndc.scot.nhs.uk/Dictionary-A-Z/Definitions/index.asp?Search=M&amp;ID=322&amp;Title=Mode of Delivery - Babies 1 to 3">http://www.ndc.scot.nhs.uk/Dictionary-A-Z/Definitions/index.asp?Search=M&amp;ID=322&amp;Title=Mode of Delivery - Babies 1 to 3</a> |
| Labour_Induction   | SMR02 | <b>1:</b> 1-8 - Induction of labour codes<br><b>0:</b> 0, None<br><b>Missing:</b> 9, Not known                                   | <a href="http://www.ndc.scot.nhs.uk/Dictionary-A-Z/Definitions/index.asp?Search=I&amp;ID=295&amp;Title=Induction of Labour">http://www.ndc.scot.nhs.uk/Dictionary-A-Z/Definitions/index.asp?Search=I&amp;ID=295&amp;Title=Induction of Labour</a>                           |
| SGA                | SMR02 | <b>1:</b> Birthweight ≤10th percentile<br><b>0:</b> Birthweight >10th percentile                                                 | Small for gestational age flag                                                                                                                                                                                                                                              |
| LGA                | SMR02 | <b>1:</b> Birthweight ≥90th percentile<br><b>0:</b> Birthweight <90th percentile                                                 | Large for gestational age flag                                                                                                                                                                                                                                              |
| Preterm_Delivery   | SMR02 | <b>1:</b> Estimated gestation < 37 weeks<br><b>0:</b> Estimated gestation ≥ 37 weeks and ≤ 42 weeks<br><b>Missing:</b> otherwise | <a href="http://www.ndc.scot.nhs.uk/Dictionary-A-Z/Definitions/index.asp?Search=E&amp;ID=242&amp;Title=Estimated Gestation">http://www.ndc.scot.nhs.uk/Dictionary-A-Z/Definitions/index.asp?Search=E&amp;ID=242&amp;Title=Estimated Gestation</a>                           |
| Postterm_Delivery  | SMR02 | <b>1:</b> Estimated gestation > 42 weeks<br><b>0:</b> Estimated gestation ≥ 37 weeks and ≤ 42 weeks<br><b>Missing:</b> otherwise | <a href="http://www.ndc.scot.nhs.uk/Dictionary-A-Z/Definitions/index.asp?Search=E&amp;ID=242&amp;Title=Estimated Gestation">http://www.ndc.scot.nhs.uk/Dictionary-A-Z/Definitions/index.asp?Search=E&amp;ID=242&amp;Title=Estimated Gestation</a>                           |
| Apgar_Score        | SMR02 | <b>1:</b> Apgar score at 5 mins < 7<br><b>0:</b> Apgar score at 5 mins ≥ 7                                                       | <a href="http://www.ndc.scot.nhs.uk/Dictionary-A-Z/Definitions/index.asp?Search=A&amp;ID=88&amp;Title=Apgar Score - Babies 1 to 3">http://www.ndc.scot.nhs.uk/Dictionary-A-Z/Definitions/index.asp?Search=A&amp;ID=88&amp;Title=Apgar Score - Babies 1 to 3</a>             |
| Maternal_Obesity   | SMR02 | <b>1:</b> Obese status<br><b>0:</b> Overweight, Healthy or underweight status                                                    | Adults with BMI ≥ 30 classed as obese. BMI of girls aged 2 - 19 years old standardized using UK1990 growth reference values and z-score ≥ 6/3 (98th centile) classed as obese.                                                                                              |



|                             |            |                                                                                 |                                                                                                                                                                                                                                                                                   |
|-----------------------------|------------|---------------------------------------------------------------------------------|-----------------------------------------------------------------------------------------------------------------------------------------------------------------------------------------------------------------------------------------------------------------------------------|
| Maternal_Overweight_Obesity | SMR02      | <b>1:</b> Overweight or Obese status<br><b>0:</b> Healthy or underweight status | Adults with BMI $\geq$ 25 classed as overweight or obese. BMI of girls aged 2 - 19 years old standardized using UK1990 growth reference values and z-score $\geq$ 4/3 (91st centile) classed as overweight or obese.                                                              |
| Age                         | SMR02      | Age of mother at delivery (in years)                                            |                                                                                                                                                                                                                                                                                   |
| Parity                      | SMR02      | Total number of previous pregnancies                                            | <a href="http://www.ndc.scot.nhs.uk/Dictionary-A-Z/Definitions/index.asp?Search=P&amp;ID=409&amp;Title=Previous%20Pregnancies">http://www.ndc.scot.nhs.uk/Dictionary-A-Z/Definitions/index.asp?Search=P&amp;ID=409&amp;Title=Previous Pregnancies</a>                             |
| Deprivation                 | SMR02      | Carstairs 2001 quintiles for Scotland                                           | 1=least deprived; 5=most deprived                                                                                                                                                                                                                                                 |
| Smoking_Status              | SMR02      | <b>1:</b> Yes<br><b>0:</b> No<br><b>Missing:</b> Not known                      | <a href="http://www.ndc.scot.nhs.uk/Dictionary-A-Z/Definitions/index.asp?Search=S&amp;ID=456&amp;Title=Smoker%20During%20Pregnancy">http://www.ndc.scot.nhs.uk/Dictionary-A-Z/Definitions/index.asp?Search=S&amp;ID=456&amp;Title=Smoker During Pregnancy</a>                     |
| Multiple_births             | SMR02      | <b>1:</b> More than one birth this pregnancy<br><b>0:</b> Single birth          | <a href="http://www.ndc.scot.nhs.uk/Dictionary-A-Z/Definitions/index.asp?Search=N&amp;ID=349&amp;Title=Number%20of%20Births%20this%20Pregnancy">http://www.ndc.scot.nhs.uk/Dictionary-A-Z/Definitions/index.asp?Search=N&amp;ID=349&amp;Title=Number of Births this Pregnancy</a> |
| Multiple_births_in_NRS      | NRS Births | <b>1:</b> Multiple babies found for this mother's delivery in NRS Births        | Multiple babies recorded in NRS Births but only a single baby recorded in SMR02                                                                                                                                                                                                   |
| Previous_Caesarean_section  | SMR02      | <b>1:</b> More than zero<br><b>0:</b> Zero                                      | <a href="http://www.ndc.scot.nhs.uk/Dictionary-A-Z/Definitions/index.asp?Search=P&amp;ID=406&amp;Title=Previous%20Caesarean%20Sections">http://www.ndc.scot.nhs.uk/Dictionary-A-Z/Definitions/index.asp?Search=P&amp;ID=406&amp;Title=Previous Caesarean Sections</a>             |

## STROBE (Strengthening The Reporting of OBservational Studies in Epidemiology) Checklist

A checklist of items that should be included in reports of observational studies. You must report the page number in your manuscript where you consider each of the items listed in this checklist. If you have not included this information, either revise your manuscript accordingly before submitting or note N/A.

**Note:** An Explanation and Elaboration article discusses each checklist item and gives methodological background and published examples of transparent reporting. The STROBE checklist is best used in conjunction with this article (freely available on the Web sites of PLoS Medicine at <http://www.plosmedicine.org/>, Annals of Internal Medicine at <http://www.annals.org/>, and Epidemiology at <http://www.epidem.com/>). Information on the STROBE Initiative is available at [www.strobe-statement.org](http://www.strobe-statement.org).

| Section and Item     | Item No. | Recommendation                                                                                                                                                                                                                                                                                                                                                                                                                                                                 | Reported on Page No. |
|----------------------|----------|--------------------------------------------------------------------------------------------------------------------------------------------------------------------------------------------------------------------------------------------------------------------------------------------------------------------------------------------------------------------------------------------------------------------------------------------------------------------------------|----------------------|
| Title and Abstract   | 1        | (a) Indicate the study's design with a commonly used term in the title or the abstract                                                                                                                                                                                                                                                                                                                                                                                         |                      |
|                      |          | (b) Provide in the abstract an informative and balanced summary of what was done and what was found                                                                                                                                                                                                                                                                                                                                                                            |                      |
| <b>Introduction</b>  |          |                                                                                                                                                                                                                                                                                                                                                                                                                                                                                |                      |
| Background/Rationale | 2        | Explain the scientific background and rationale for the investigation being reported                                                                                                                                                                                                                                                                                                                                                                                           |                      |
| Objectives           | 3        | State specific objectives, including any prespecified hypotheses                                                                                                                                                                                                                                                                                                                                                                                                               |                      |
| <b>Methods</b>       |          |                                                                                                                                                                                                                                                                                                                                                                                                                                                                                |                      |
| Study Design         | 4        | Present key elements of study design early in the paper                                                                                                                                                                                                                                                                                                                                                                                                                        |                      |
| Setting              | 5        | Describe the setting, locations, and relevant dates, including periods of recruitment, exposure, follow-up, and data collection                                                                                                                                                                                                                                                                                                                                                |                      |
| Participants         | 6        | (a) <i>Cohort study</i> —Give the eligibility criteria, and the sources and methods of selection of participants. Describe methods of follow-up<br><br><i>Case-control study</i> —Give the eligibility criteria, and the sources and methods of case ascertainment and control selection. Give the rationale for the choice of cases and controls<br><br><i>Cross-sectional study</i> —Give the eligibility criteria, and the sources and methods of selection of participants |                      |
|                      |          | (b) <i>Cohort study</i> —For matched studies, give matching criteria and number of exposed and unexposed<br><br><i>Case-control study</i> —For matched studies, give matching criteria and the number of controls per case                                                                                                                                                                                                                                                     |                      |
| Variables            | 7        | Clearly define all outcomes, exposures, predictors, potential confounders, and effect modifiers. Give diagnostic criteria, if applicable                                                                                                                                                                                                                                                                                                                                       |                      |

| Section and Item             | Item No. | Recommendation                                                                                                                                                                                                                                                                                            | Reported on Page No. |
|------------------------------|----------|-----------------------------------------------------------------------------------------------------------------------------------------------------------------------------------------------------------------------------------------------------------------------------------------------------------|----------------------|
| Data Sources/<br>Measurement | 8*       | For each variable of interest, give sources of data and details of methods of assessment (measurement). Describe comparability of assessment methods if there is more than one group                                                                                                                      |                      |
| Bias                         | 9        | Describe any efforts to address potential sources of bias                                                                                                                                                                                                                                                 |                      |
| Study Size                   | 10       | Explain how the study size was arrived at                                                                                                                                                                                                                                                                 |                      |
| Quantitative Variables       | 11       | Explain how quantitative variables were handled in the analyses. If applicable, describe which groupings were chosen and why                                                                                                                                                                              |                      |
| Statistical Methods          | 12       | (a) Describe all statistical methods, including those used to control for confounding                                                                                                                                                                                                                     |                      |
|                              |          | (b) Describe any methods used to examine subgroups and interactions                                                                                                                                                                                                                                       |                      |
|                              |          | (c) Explain how missing data were addressed                                                                                                                                                                                                                                                               |                      |
|                              |          | (d) <i>Cohort study</i> —If applicable, explain how loss to follow-up was addressed<br><i>Case-control study</i> —If applicable, explain how matching of cases and controls was addressed<br><i>Cross-sectional study</i> —If applicable, describe analytical methods taking account of sampling strategy |                      |
|                              |          | (e) Describe any sensitivity analyses                                                                                                                                                                                                                                                                     |                      |
| <b>Results</b>               |          |                                                                                                                                                                                                                                                                                                           |                      |
| Participants                 | 13*      | (a) Report numbers of individuals at each stage of study—eg numbers potentially eligible, examined for eligibility, confirmed eligible, included in the study, completing follow-up, and analysed                                                                                                         |                      |
|                              |          | (b) Give reasons for non-participation at each stage                                                                                                                                                                                                                                                      |                      |
|                              |          | (c) Consider use of a flow diagram                                                                                                                                                                                                                                                                        |                      |
| Descriptive Data             | 14*      | (a) Give characteristics of study participants (eg demographic, clinical, social) and information on exposures and potential confounders                                                                                                                                                                  |                      |
|                              |          | (b) Indicate number of participants with missing data for each variable of interest                                                                                                                                                                                                                       |                      |
|                              |          | (c) <i>Cohort study</i> —Summarise follow-up time (eg, average and total amount)                                                                                                                                                                                                                          |                      |
| Outcome Data                 | 15*      | <i>Cohort study</i> —Report numbers of outcome events or summary measures over time                                                                                                                                                                                                                       |                      |
|                              |          | <i>Case-control study</i> —Report numbers in each exposure category, or summary measures of exposure                                                                                                                                                                                                      |                      |
|                              |          | <i>Cross-sectional study</i> —Report numbers of outcome events or summary measures                                                                                                                                                                                                                        |                      |

| Section and Item         | Item No. | Recommendation                                                                                                                                                                                               | Reported on Page No. |
|--------------------------|----------|--------------------------------------------------------------------------------------------------------------------------------------------------------------------------------------------------------------|----------------------|
| Main Results             | 16       | (a) Give unadjusted estimates and, if applicable, confounder-adjusted estimates and their precision (eg, 95% confidence interval). Make clear which confounders were adjusted for and why they were included |                      |
|                          |          | (b) Report category boundaries when continuous variables were categorized                                                                                                                                    |                      |
|                          |          | (c) If relevant, consider translating estimates of relative risk into absolute risk for a meaningful time period                                                                                             |                      |
| Other Analyses           | 17       | Report other analyses done—eg analyses of subgroups and interactions, and sensitivity analyses                                                                                                               |                      |
| <b>Discussion</b>        |          |                                                                                                                                                                                                              |                      |
| Key Results              | 18       | Summarise key results with reference to study objectives                                                                                                                                                     |                      |
| Limitations              | 19       | Discuss limitations of the study, taking into account sources of potential bias or imprecision. Discuss both direction and magnitude of any potential bias                                                   |                      |
| Interpretation           | 20       | Give a cautious overall interpretation of results considering objectives, limitations, multiplicity of analyses, results from similar studies, and other relevant evidence                                   |                      |
| Generalisability         | 21       | Discuss the generalisability (external validity) of the study results                                                                                                                                        |                      |
| <b>Other Information</b> |          |                                                                                                                                                                                                              |                      |
| Funding                  | 22       | Give the source of funding and the role of the funders for the present study and, if applicable, for the original study on which the present article is based                                                |                      |

\*Give information separately for cases and controls in case-control studies and, if applicable, for exposed and unexposed groups in cohort and cross-sectional studies.

**Once you have completed this checklist, please save a copy and upload it as part of your submission. DO NOT include this checklist as part of the main manuscript document. It must be uploaded as a separate file.**

# BMJ Open

## A cohort study of high maternal Body Mass Index and the risk of adverse pregnancy and delivery outcomes in Scotland

|                                 |                                                                                                                                                                                                                                                                                                                                                    |
|---------------------------------|----------------------------------------------------------------------------------------------------------------------------------------------------------------------------------------------------------------------------------------------------------------------------------------------------------------------------------------------------|
| Journal:                        | <i>BMJ Open</i>                                                                                                                                                                                                                                                                                                                                    |
| Manuscript ID                   | bmjopen-2018-026168.R3                                                                                                                                                                                                                                                                                                                             |
| Article Type:                   | Original research                                                                                                                                                                                                                                                                                                                                  |
| Date Submitted by the Author:   | 07-Nov-2019                                                                                                                                                                                                                                                                                                                                        |
| Complete List of Authors:       | Doi, Lawrence; University of Edinburgh, Scottish Collaboration for Public Health Research and Policy, School of Health in Social Science<br>Williams, Andrew James; University of Exeter<br>Marryat, Louise; University of Edinburgh, SCPHRP<br>Frank, John; University of Edinburgh, Scottish Collaboration for Public Health Research and Policy |
| <b>Primary Subject Heading</b>: | Obstetrics and gynaecology                                                                                                                                                                                                                                                                                                                         |
| Secondary Subject Heading:      | Epidemiology, Paediatrics, Public health, Reproductive medicine, Health policy                                                                                                                                                                                                                                                                     |
| Keywords:                       | OBSTETRICS, EPIDEMIOLOGY, PUBLIC HEALTH                                                                                                                                                                                                                                                                                                            |
|                                 |                                                                                                                                                                                                                                                                                                                                                    |

SCHOLARONE™  
Manuscripts



I, the Submitting Author has the right to grant and does grant on behalf of all authors of the Work (as defined in the below author licence), an exclusive licence and/or a non-exclusive licence for contributions from authors who are: i) UK Crown employees; ii) where BMJ has agreed a CC-BY licence shall apply, and/or iii) in accordance with the terms applicable for US Federal Government officers or employees acting as part of their official duties; on a worldwide, perpetual, irrevocable, royalty-free basis to BMJ Publishing Group Ltd ("BMJ") its licensees and where the relevant Journal is co-owned by BMJ to the co-owners of the Journal, to publish the Work in this journal and any other BMJ products and to exploit all rights, as set out in our [licence](#).

The Submitting Author accepts and understands that any supply made under these terms is made by BMJ to the Submitting Author unless you are acting as an employee on behalf of your employer or a postgraduate student of an affiliated institution which is paying any applicable article publishing charge ("APC") for Open Access articles. Where the Submitting Author wishes to make the Work available on an Open Access basis (and intends to pay the relevant APC), the terms of reuse of such Open Access shall be governed by a Creative Commons licence – details of these licences and which [Creative Commons](#) licence will apply to this Work are set out in our licence referred to above.

Other than as permitted in any relevant BMJ Author's Self Archiving Policies, I confirm this Work has not been accepted for publication elsewhere, is not being considered for publication elsewhere and does not duplicate material already published. I confirm all authors consent to publication of this Work and authorise the granting of this licence.

# A cohort study of high maternal Body Mass Index and the risk of adverse pregnancy and delivery outcomes in Scotland

Lawrence Doi<sup>1\*</sup>, Andrew James Williams<sup>2</sup>, Louise Marryat<sup>3,4</sup>, John Frank<sup>3,5</sup>

\*Correspondence: [larry.doi@ed.ac.uk](mailto:larry.doi@ed.ac.uk)

<sup>1</sup>Scottish Collaboration for Public Health Research and Policy, School of Health in Social Science, University of Edinburgh, Doorway 6, Old Medical School, Teviot Place, EH8 9AG, UK.

<sup>2</sup>European Centre for Environment and Human Health, College of Medicine and Health, University of Exeter, Knowledge Spa, Royal Cornwall Hospital, Truro, Cornwall TR1 3HD, UK.

<sup>3</sup>Farr Institute at Scotland, University of Edinburgh, Nine, Edinburgh BioQuarter, 9 Little France Road, Edinburgh EH16 4UX, UK.

<sup>4</sup>Centre for Clinical Brain Sciences, University of Edinburgh, Royal Edinburgh Hospital, Kennedy Tower, Morningside Park, Edinburgh EH10 5HF, UK.

<sup>5</sup>Usher Institute of Population Health Sciences and Informatics, University of Edinburgh, Doorway 1, Old Medical School, Teviot Place, EH8 9AG, UK.

## Abstract

**Objective:** To examine the association between high maternal weight status and complications during pregnancy and delivery.

**Setting:** Scotland

**Participants:** Data from 135,860 first time singleton deliveries in Scotland between 2008 and 2015 were used. Women with overweight and obesity were compared with women with normal weight. Associations between maternal body mass index and complications during pregnancy and delivery were evaluated.

**Outcome measures:** Gestational diabetes, gestational hypertension, pre-eclampsia, placenta praevia, placental abruption, induction of labour, elective and emergency caesarean sections, pre-term delivery, post-term delivery, low Apgar score, small for gestational age and large for gestational age.

**Results:** In the multivariable models controlling for potential confounders, we found that compared with women with normal weight, the odds of the following outcomes were significantly increased for women with overweight and obesity [overweight adjusted odds ratio; 95% confidence interval, followed by the same for women with obesity]: gestational hypertension [1.61; 1.49-1.74], [2.48; 2.30-2.68]; gestational diabetes [2.14; 1.86-2.46], [8.25; 7.33-9.30]; pre-eclampsia [1.46; 1.32-1.63] [2.07; 1.87-2.29]; labour induction [1.28; 1.23-1.33], [1.69; 1.62-1.76] and emergency caesarean section [1.82; 1.74-1.91], [3.14; 3.00-3.29].

**Conclusions:** Women with overweight and obesity in Scotland are at greater risk of adverse pregnancy and delivery outcomes. The risk of these conditions increases steadily with increasing body mass index. Health professionals should be



empowered and trained to deliver promising dietary and lifestyle interventions to women at risk of overweight and obesity prior to conception, and control excessive weight gain in pregnancy.

### Strengths and limitations of this study

- This study used a large, retrospectively accessed but cohort-structured, national database covering some of the major maternal and neonatal outcomes in Scotland over eight recent years.
- Analysis used whole study population with adjustment for key potential confounders to estimate impact of high maternal-weight status on each outcome.
- All women with BMI of 30 kg/m<sup>2</sup> or more were considered as having obesity; it is likely that differentiating morbid obesity or obesity class II and III from obesity would have generated more precise risk estimates.
- The completeness of the recording of BMI increased during the study period (2008 to 2015) from 69% to 98%. Using data from the earlier years when the BMI was missing more often might have biased the study sample if it was the case that BMI was not missing at random.

## Introduction

The increasing global prevalence of overweight and obesity makes it more likely that a growing number of women with high body mass index (BMI) are becoming pregnant. High maternal BMI during pregnancy has immediate implications for pregnancy complications as well as long-term health implications for both women and offspring (1,2). For instance, in terms of pregnancy complications, a systematic review and meta-analysis involving 11 cohort studies found that caesarean delivery risk increased by 50% in pregnant women who were overweight and was more than double for women who were obese compared with women with normal BMI (3).

Among women, high BMI during pregnancy could lead to future chronic disease such as diabetes, heart disease and hypertension (4). Surviving offspring are also more prone to long-term obesity, hypertension, coronary heart disease, diabetes, stroke and asthma (4,5).

Both immediate and long-term health implications of high BMI during pregnancy have economic consequences. For example, a recent study examining infant health utilisation and costs on the NHS in the UK of infants born to women with overweight or obesity found that total mean additional resource cost for infants born to women who are overweight was £65.13, and £1138.11 for infants born to women who are obese (6).

Maternal weights are currently high in Scotland: a recent study reported that 31.5% of mothers were overweight and a further 23.6% were affected by obesity (7). A retrospective cohort study using Scottish obstetric data from 2003 to 2010 examined the impact of maternal BMI on clinical complications, inpatient admissions, and additional short-term costs to the NHS in Scotland revealed that maternal BMI

1  
2  
3 influences maternal and neonatal morbidity, the number and duration of maternal  
4 and neonatal admissions, and health service costs (8). The study also showed that in  
5  
6 comparison with women of normal weight, women who were overweight, obese, or  
7  
8 severely obese had an increased risk of essential hypertension [1.87 (1.18–2.96),  
9  
10 11.90 (7.18–19.72), and 36.10 (18.33–71.10)], pregnancy-induced hypertension  
11  
12 [1.76 (1.60–1.95), 2.98 (2.65–3.36), and 4.48 (3.57–5.63)], gestational diabetes [3.39  
13  
14 (2.30–4.99), 11.90 (7.54–18.79), and 67.40 (37.84–120.03)], emergency caesarean  
15  
16 section [1.94 (1.71–2.21), 3.40 (2.91–3.96), and 14.34 (9.38–21.94)], and elective  
17  
18 caesarean section [2.06 (1.84–2.30), 4.61 (4.06–5.24), and 17.92 (13.20–24.34)] (8).  
19  
20 Smith et al. (9) using data from 187,290 women in Scotland to examine the risk of  
21  
22 maternal obesity in early pregnancy and the risk of pre-term delivery in a  
23  
24 retrospective cohort study, found that among nulliparous women, the risk of an  
25  
26 elective pre-term delivery increased with increasing BMI. The study also observed  
27  
28 that 40% of morbidly obese nulliparous women who experienced an elective pre-  
29  
30 term delivery had been diagnosed with pre-eclampsia, in contrast with only 2.6% of  
31  
32 the remaining study population (9). In the current study, our aim was to use more  
33  
34 recent data to examine the associations between high maternal BMI and  
35  
36 complications during pregnancy and delivery in Scotland. Understanding of these  
37  
38 associations can highlight areas where prevention strategies could be targeted.  
39  
40  
41  
42  
43  
44  
45  
46  
47  
48  
49

## 50 **Methods**

### 51 ***Study population and data sources***

52  
53 This retrospective cohort study used data from 135,860 first time mothers who gave  
54  
55 birth to only one child in Scotland between January 2008 and December 2015. The  
56  
57  
58  
59  
60

1  
2  
3 women and infants were identified within three electronic medical record databases:  
4  
5 the Scottish Morbidity Record (SMR) 01 and 02 and Scottish Birth Record (SBR).  
6  
7 SMR01 is generated for patients receiving inpatient or day care in the General or  
8  
9 Acute specialties, whilst SMR02 is generated for patients receiving inpatient or day  
10  
11 care in the Obstetric Specialties. The SBR records all of a baby's neonatal care in  
12  
13 Scotland. The outcome variables are recorded in these databases according the  
14  
15 World Health Organization's International Classification of Diseases, Tenth Revision  
16  
17 (ICD-10). Further description of the content of these databases is available (10) and  
18  
19 in the web-appendix. Approval was obtained from the Public Benefit and Privacy  
20  
21 Panel via the national Electronic Data Research and Innovation Service to use the  
22  
23 anonymised data collected by these registries.  
24  
25  
26  
27  
28

### 29 ***Patient and public involvement***

30  
31  
32 Patients were not involved in the design, analysis and interpretation of this study.  
33  
34

### 35 ***Exposure variable***

36  
37  
38 More than 80% of pregnant women in Scotland present themselves for antenatal  
39  
40 care during the first trimester of their pregnancy. Height and weight are measured  
41  
42 by the midwife at the first antenatal visit, typically before 12 weeks of pregnancy.  
43  
44 Body mass index (BMI) was calculated using the formula weight (kg)/height (m<sup>2</sup>).  
45  
46 BMI categories were defined as normal (<25 kg/m<sup>2</sup>), overweight (≥25 kg/m<sup>2</sup> to  
47  
48 <30 kg/m<sup>2</sup>) and obese (≥30 kg/m<sup>2</sup>). BMI completeness was 69% in 2008 but this  
49  
50 increased gradually to 87% in 2011 when recording of weight and height became  
51  
52 mandatory. By 2015 BMI completeness was 98%.  
53  
54  
55  
56  
57  
58  
59  
60

## **Outcomes**

Outcome measures included were maternal or pregnancy complications such as gestational diabetes, gestational hypertension and pre-eclampsia (high blood pressure and protein in urine). Conditions affecting delivery or delivery complications studied were placenta praevia (when a baby's placenta partially or totally covers the mother's cervix), placental abruption (when the placenta separates early from the uterus before childbirth), induction of labour, caesarean delivery (includes elective and emergency caesarean sections), pre-term delivery (defined as less than 37 weeks of gestation), post-term delivery (more than 42 weeks of gestation), low Apgar score (less than "7" at 5 minutes), small for gestational age (SGA), and large for gestational age (LGA). SGA were infants with birthweight of  $\leq 10^{\text{th}}$  percentile for gestational age according to UK1990 growth reference curve (11,12), and those with LGA were infants with birth weight  $\geq 90^{\text{th}}$  percentile.

## **Covariates**

Maternal age at delivery, smoking during pregnancy and Carstairs 2001 quintiles for socio-economic status in Scotland, based on the postcode of the mother's residence at birth, were considered as potentially confounding variables and were included as covariates in the adjusted analyses. Table 1 describes the covariates used in this study by maternal weight status among singleton (a pregnancy with one fetus, as opposed to twins or multiples) first-time pregnancies. The data in Table 1 show the numbers of women who had data on age, deprivation and maternal smoking. This means that the total number of women shown is slightly larger than the number of women analysed as there were women missing some outcome data.

Table 1. Maternal characteristics among normal weight, overweight and obese women<sup>+</sup> (singleton, first pregnancies)

|                                              | Normal* |      | Overweight* |      | Obese* |      |
|----------------------------------------------|---------|------|-------------|------|--------|------|
|                                              | N       | %    | N           | %    | N      | %    |
| <b>Maternal age (y)</b>                      |         |      |             |      |        |      |
| 20-24                                        | 19,874  | 27.2 | 9,368       | 25.3 | 7,016  | 27.3 |
| 25-29                                        | 24,443  | 33.4 | 12,174      | 32.9 | 8,475  | 32.9 |
| 30-34                                        | 20,880  | 28.6 | 10,522      | 28.4 | 6,922  | 26.9 |
| 35-39                                        | 7,933   | 10.9 | 4,928       | 13.3 | 3,325  | 12.9 |
| <b>Carstairs 2001 quintiles for Scotland</b> |         |      |             |      |        |      |
| Q1 (Least deprived)                          | 14,695  | 20.1 | 6,785       | 18.3 | 3,870  | 15.0 |
| Q2                                           | 13,820  | 18.9 | 6,851       | 18.5 | 4,639  | 18.0 |
| Q3                                           | 14,581  | 19.9 | 7,549       | 20.4 | 5,117  | 19.9 |
| Q4                                           | 15,338  | 21.0 | 7,994       | 21.6 | 6,079  | 23.6 |
| Q5 (Most deprived)                           | 14,696  | 20.1 | 7,813       | 21.1 | 6,033  | 23.4 |
| <b>Maternal smoking in pregnancy</b>         |         |      |             |      |        |      |
| No                                           | 62,439  | 85.4 | 31,806      | 86.0 | 21,604 | 83.9 |
| Yes                                          | 10,691  | 14.6 | 5,186       | 14.0 | 4,134  | 16.1 |

\*Maternal weight status at first antenatal visit

<sup>+</sup>Figures show women who had complete data on age, deprivation and maternal smoking

### Data analysis

Using Stata 14 (13), logistic regression was used to calculate odds ratios (ORs). BMI groups with overweight and obesity were compared with the normal BMI group (the reference population). A confidence interval (CI) of 95% was produced for all ORs.

The analysis of the outcomes proceeded in a systematic approach.

For the first group of outcomes (gestational diabetes, hypertension and pre-eclampsia) the models were adjusted for confounders, and for the two other conditions that were not the dependent variable, as these conditions can co-occur. This approach was taken throughout the analysis, adjusting for conditions,

1  
2  
3 which precede or occur contemporaneously with the outcome being examined as the  
4 dependent variable. This was not done when the outcomes could not co-occur such  
5 as pre-term and post-term, SGA and LGA, or method of delivery (induction, elective  
6 or emergency C-section). Please see the supplemental file 1 for full details of the  
7 variables adjusted for in each model.  
8  
9  
10  
11  
12  
13  
14  
15  
16  
17  
18  
19

## 20 **Results**

21  
22  
23 Within our study population 53.8 % of pregnant women were categorised as normal  
24 weight, 27.3% as overweight and 18.9% as obese. The socio-demographic  
25 characteristics of the women in the three BMI categories are presented in Table 1.  
26 Maternal smoking prevalence was slightly higher among women with obesity than in  
27 women with normal weight or overweight. Among the women who were overweight,  
28 21.1% were from the most deprived and 18.3% were from the least deprived group.  
29 However, the difference in social deprivation was more marked within women with  
30 obesity. Among this group, 23.4% were from the most deprived group whilst 15.0%  
31 were from the least deprived group.  
32  
33  
34  
35  
36  
37  
38  
39  
40  
41  
42  
43  
44

45 Table 2 shows odds ratios (OR) for pregnancy and delivery complications, among  
46 women who were overweight or obese. The risk of gestational diabetes, pre-  
47 eclampsia and hypertension increased steadily with increasing BMI. Compared to  
48 the normal BMI group, the odds ratio of gestational diabetes was 2.14 (95% CI: 1.86-  
49 2.46) but among women who were obese the OR increased to 8.25 (95% CI: 7.33 –  
50 9.30). Relative to women who were of normal weight, the adjusted OR of pre-  
51 eclampsia for women who were overweight was 1.46 (95% CI: 1.32-1.62), and 2.07  
52  
53  
54  
55  
56  
57  
58  
59  
60

1  
2  
3 (95% CI: 1.87-2.29) for women who were obese. The OR of gestational  
4  
5 hypertension, compared with women with normal weight, was 1.61 (95% CI: 1.49-  
6  
7 1.74) for women with overweight, and 2.48 (95% CI: 2.30-2.68) for women with  
8  
9 obesity.  
10  
11  
12  
13  
14  
15  
16  
17  
18  
19  
20  
21  
22  
23  
24  
25  
26  
27  
28  
29  
30  
31  
32  
33  
34  
35  
36  
37  
38  
39  
40  
41  
42  
43  
44  
45  
46  
47  
48  
49  
50  
51  
52  
53  
54  
55  
56  
57  
58  
59  
60

For peer review only



Table 2. Pregnancy and delivery complications among normal, overweight and obese singleton women

|                                              | Total sample | Normal N (%)  | Cases (%)     | Overweight N (%) | Cases (%)     | Adjusted OR* (95% CI) | Obese N (%)   | Cases (%)    | Adjusted OR* (95% CI) |
|----------------------------------------------|--------------|---------------|---------------|------------------|---------------|-----------------------|---------------|--------------|-----------------------|
| <b>Conditions occurring during pregnancy</b> |              |               |               |                  |               |                       |               |              |                       |
| Gestational hypertension                     | 132,899      | 71,538 (53.8) | 1,550 (2.2)   | 36,188 (27.2)    | 1,239 (3.4)   | 1.61 (1.49, 1.74)     | 25,173 (18.9) | 1,275 (5.1)  | 2.48 (2.30, 2.68)     |
| Gestational diabetes                         | 132,899      | 71,538 (53.8) | 377 (0.5)     | 36,188 (27.2)    | 418 (1.2)     | 2.14 (1.86, 2.46)     | 25,173 (18.9) | 1,082 (4.3)  | 8.25 (7.33, 9.30)     |
| Pre-eclampsia                                | 132,899      | 71,538 (53.8) | 906 (1.3)     | 36,188 (27.2)    | 664 (1.8)     | 1.46 (1.32, 1.62)     | 25,173 (18.9) | 640 (2.5)    | 2.07 (1.87, 2.29)     |
| <b>Conditions affecting delivery</b>         |              |               |               |                  |               |                       |               |              |                       |
| Placenta praevia <sup>1</sup>                | 132,212      | 71,172 (53.8) | 102 (0.1)     | 36,001 (27.2)    | 66 (0.2)      | 1.23 (0.90, 1.68)     | 25,039 (18.9) | 30 (0.1)     | 0.81 (0.54, 1.22)     |
| Placental abruption <sup>1</sup>             | 132,212      | 71,172 (53.8) | 133 (0.2)     | 36,001 (27.2)    | 55 (0.2)      | 0.81 (0.59, 1.11)     | 25,039 (18.9) | 38 (0.2)     | 0.76 (0.53, 1.10)     |
| Small for gestational age <sup>1</sup>       | 94,906       | 53,320 (56.2) | 6,664 (12.5)  | 25,122 (26.5)    | 2,645 (10.5)  | 0.81 (0.78, 0.85)     | 16,464 (17.4) | 1,726 (10.5) | 0.79 (0.74, 0.83)     |
| Large for gestational age <sup>1</sup>       | 121,177      | 64,508 (53.2) | 17,852 (27.7) | 33,356 (27.5)    | 10,879 (32.6) | 1.27 (1.23, 1.30)     | 23,313 (19.2) | 8,575 (36.8) | 1.53 (1.48, 1.58)     |
| Pre-term                                     | 132,212      | 71,172 (53.8) | 4,295 (6.0)   | 36,001 (27.2)    | 2,231 (6.2)   | 1.02 (0.96, 1.07)     | 25,039 (18.9) | 1,725 (6.9)  | 1.11 (1.05, 1.18)     |
| Post-term <sup>2</sup>                       | 78,074       | 43,486 (55.7) | 31 (0.1)      | 20,973 (26.9)    | 24 (0.1)      | 1.57 (0.93, 2.68)     | 13,615 (17.4) | 14 (0.1)     | 1.47 (0.78, 2.77)     |
| <b>Delivery</b>                              |              |               |               |                  |               |                       |               |              |                       |
| Induction of labour                          | 92,967       | 53,617 (57.7) | 13,417 (25.0) | 24,342 (26.2)    | 7,420 (30.5)  | 1.28 (1.23, 1.33)     | 15,008 (16.1) | 5,712 (38.1) | 1.69 (1.62, 1.76)     |
| Caesarean section                            | 90,183       | 51,798 (57.4) | 11,598 (22.4) | 23,827 (26.4)    | 6,905 (29.0)  | 1.34 (1.29, 1.39)     | 14,558 (16.1) | 5,262 (36.2) | 1.80 (1.73, 1.88)     |
| Emergency caesarean section                  | 80,938       | 45,715 (56.5) | 5,515 (12.1)  | 21,397 (26.4)    | 4,475 (20.9)  | 1.82 (1.74, 1.91)     | 13,826 (17.1) | 4,530 (32.8) | 3.14 (3.00, 3.29)     |
| Apgar score                                  | 129,773      | 70,012 (54.0) | 12,583 (18.0) | 35,307 (27.2)    | 6,125 (17.4)  | 0.95 (0.92, 0.99)     | 24,454 (18.8) | 4,342 (17.8) | 0.96 (0.93, 1.00)     |

OR = Odd Ratio; CI = Confidence Interval

\*Adjusted for maternal age, deprivation, smoking in pregnancy and the pre- or co-existing conditions (see supplemental file 2)

<sup>1</sup>70 post-term births were excluded from these models as none of them experienced the outcome being estimated

<sup>2</sup>No participants in the study delivering post-term had placenta praevia, placental abruption or had small or large for gestational age babies; therefore 45,957 participants were dropped from this analysis

1  
2  
3  
4  
5  
6 Regarding conditions affecting delivery, the odds ratio of placenta praevia was not  
7 statistically significant different for both women who were overweight (OR 1.23,  
8 95%CI: 0.90-1.68) or obese (OR 0.81, 95%CI: 0.54-1.22), compared with women  
9 with normal weight. The odds ratio of experiencing placental abruption was also not  
10 statistically significantly different across the different BMI categories.  
11  
12  
13  
14  
15  
16  
17

18 In contrast with the normal BMI group, births to women who were overweight and  
19 obese were associated with decreased risk of small-for-gestational age ORs 0.81  
20 (95% CI: 0.78-0.85) and 0.79 (95% CI: 0.74-0.83) respectively. However, the risk of  
21 large-for-gestational age newborns increased among women with overweight, OR of  
22 1.27 (95%CI: 1.23-1.30) 1.30 (95%CI: 1.26-1.33) and women with obesity, OR 1.53  
23 (95%CI: 1.48-1.58), compared with women of normal weight. Compared to the  
24 normal BMI group, the adjusted odds ratio of pre-term delivery was 1.02 (95% CI:  
25 0.96-1.07), however among women who were obese the risk was 1.11 (95% CI:  
26 1.05-1.18). Relative to women who were of normal weight, the adjusted OR of post-  
27 term for women who were overweight was 1.57 (95% CI: 0.93-2.68) and 1.47 (95%  
28 CI: 0.78-2.77) for women who were obese.  
29  
30  
31  
32  
33  
34  
35  
36  
37  
38  
39  
40  
41  
42  
43  
44  
45

46 The odds of induction of labour and caesarean section, either elective or emergency,  
47 increased with increasing BMI. Regarding induction of labour, the odds ratios were  
48 statistically significant for women with overweight (OR 1.28, 95%CI: 1.23-1.33) and  
49 those with obesity (OR 1.69, 95%CI: 1.62-1.76) compared with women with normal  
50 weight. Women who were overweight had odds ratios of 1.34 (95% CI: 1.29-1.39) for  
51 having an elective Caesarean section and higher ORs (1.82, 95% CI: 1.74-1.91) for  
52 undergoing emergency Caesarean section, compared with women of normal weight.  
53  
54  
55  
56  
57  
58  
59  
60

1  
2  
3 The corresponding ORs for women with obesity were 1.80 (95% CI: 1.73-1.88) and  
4  
5 3.14 (95% CI: 3.00-3.29). Being overweight or obese was associated with reduced  
6  
7 risk of low Apgar score. This was barely statistically significant for women who were  
8  
9 overweight (OR 0.95, 95% CI: 0.92-0.99) or obese (OR 0.96, 95% CI: 0.93-1.00).  
10  
11  
12  
13  
14  
15  
16  
17

## 18 **Discussion**

19  
20  
21 In this large, retrospective cohort study, we found that overweight or obesity during  
22  
23 pregnancy increased the risk of several adverse pregnancy and delivery  
24  
25 complications. Some earlier studies have also found similar findings. Aside from  
26  
27 obesity, we also examined overweight because in most populations, a greater  
28  
29 number of women are overweight rather than obese, so it is important to also  
30  
31 understand the impact of overweight on pregnancy and neonatal outcomes.  
32  
33  
34  
35  
36

37 In terms of the association between high maternal BMI and conditions that occur  
38  
39 *during* pregnancy, we found that the risk of all the conditions considered (gestational  
40  
41 hypertension, gestational diabetes and pre-eclampsia) increased steadily with  
42  
43 increasing BMI, which is in line with similar studies (2,14,15). A study compared  
44  
45 women of normal weight to women who were morbidly obese (BMI greater than 40),  
46  
47 and also found that there was an increased risk of pre-eclampsia (OR 4.82; 95% CI:  
48  
49 4.04-5.74) (14). Our study also found that, aside from heightened pre-eclampsia risk  
50  
51 for women with obesity, being overweight was also significantly associated with this  
52  
53 outcome, albeit to a lesser degree. A meta-analysis of the association between  
54  
55 maternal BMI and the risk of pre-eclampsia showed that the risk doubled with each  
56  
57  
58  
59  
60

1  
2  
3 5-7 kg/m<sup>2</sup> increase in pre-pregnancy BMI (16). It is evident that the risk of pre-  
4 eclampsia increases with the degree of weight gain; therefore preventative strategies  
5  
6  
7  
8 should be focussed on getting women, especially those already overweight, to  
9  
10 reduce weight prior to conception. Weight loss in pregnancy requires careful  
11  
12 management in order to avoid unintended consequences (17). Nevertheless, women  
13  
14 often engage with health professionals during pregnancy; therefore dietary and  
15  
16 lifestyle interventions such as physical activity, which have been shown by reviews  
17  
18 and meta-analyses (17,18) to reduce gestational weight gain and improve outcomes  
19  
20 for both mother and baby, could be provided to them.  
21  
22  
23  
24  
25

26 Generally, rates of Caesarean delivery have increased significantly across many  
27  
28 developed countries in recent years (19). Our study found that women with  
29  
30 overweight and obesity showed an increased risk of Caesarean delivery (both  
31  
32 elective and emergency) compared to normal-weight women, but we note that the  
33  
34 overall frequency of Caesarean delivery across our obstetric population seems quite  
35  
36 high, compared with a previous Swedish study (14). We also found that women with  
37  
38 overweight and obesity are at increased risk of labour induction. A very recent  
39  
40 systematic review found that women with obesity are more likely than women with a  
41  
42 normal weight to end labour induction with Caesarean delivery (20). Possible  
43  
44 reasons could be that Caesarean delivery is probably less risky now, due to  
45  
46 advances in medical science, which facilitate accurate monitoring of the progress of  
47  
48 labour and the detection of fetal intra-partum conditions (21). It is also possible that  
49  
50 health professionals in Scotland are probably intervening early with regards to  
51  
52 problems in labour among women with overweight or obesity, in order to reduce fetal  
53  
54 distress, and its worst outcomes. Nevertheless, this pattern of very high Caesarean  
55  
56  
57  
58  
59  
60

1  
2  
3 rates is quite concerning for Scotland, which has invested in programmes aimed at  
4 promoting natural birth, such as Keeping Childbirth Natural and Dynamic (KCND).  
5  
6 The KCND is a maternity care programme introduced by the Scottish Government  
7  
8 with the aim of maximising opportunities for women to have as natural a birth  
9  
10 experience as possible, reduce unnecessary interventions in low-risk pregnancy and  
11  
12 childbirth, and to provide women-centred care (22,23,24). The early intervention in  
13  
14 pregnancy may also explain the reduced risk of low Apgar score for infants born to  
15  
16 women with overweight and obesity. It is likely that these women are may receive  
17  
18 increased monitoring, which means issues can be identified and managed earlier, to  
19  
20 reduce any fetal distress in labour.  
21  
22  
23  
24  
25  
26  
27  
28

29 Adiposity increases risk of large-for-gestational age and macrosomia (25). In this  
30  
31 study, we found that births to women with overweight and obesity were associated  
32  
33 with an increased risk of large-for-gestational age infants compared with women of  
34  
35 normal weight. Excess weight in pregnancy may shift the entire birth weight  
36  
37 distribution upwards, perhaps through hormonal mechanisms that operate at lower  
38  
39 levels than in full-blown cases of macrosomia in infants of diabetic mothers. It is  
40  
41 therefore unsurprising that high maternal BMI significantly decreased the risk of  
42  
43 small-for-gestational age among our study population.  
44  
45  
46  
47  
48  
49

50 We found that pregnant women with obesity were at significantly increased risk of  
51  
52 pre-term delivery, however the risk was high but not statistically significant for  
53  
54 women with overweight. A systematic review examining the effect of maternal  
55  
56 overweight and obesity on pre-term delivery showed that both women with  
57  
58 overweight and obesity were at significantly higher risk of pre-term delivery (26). It  
59  
60

1  
2  
3 has been shown that pre-eclampsia leads to pre-term delivery, especially in elective  
4 pre-term delivery (27). It is not clear why the relative risk of pre-term delivery for  
5 women with overweight in our study population was not statistically significant.  
6  
7 However, it is likely that the higher risk of pre-eclampsia in women with obesity,  
8 compared with women with overweight, could explain this finding. Regarding post-  
9 term delivery, there were no statistically significant relative risks among women with  
10 both overweight and obesity. As discussed previously, it is likely that early  
11 intervention in pregnancy among our study population reduced the risk of the  
12 occurrence of post-term delivery.  
13  
14  
15  
16  
17  
18  
19  
20  
21  
22  
23  
24  
25

26 We examined the association between high maternal BMI and placental abruption  
27 and placenta praevia, but found no statistically significant association between each  
28 of these two outcomes and overweight or obesity. This finding is congruent with a  
29 previous study (14). It appears that the relationships between maternal overweight  
30 and obesity, and both placental abruption and placenta praevia, may require further  
31 attention in future research.  
32  
33  
34  
35  
36  
37  
38  
39  
40  
41  
42

### 43 ***Strengths and limitations***

44 This study used a large, retrospectively accessed but cohort-structured, national  
45 database covering several maternal and neonatal outcomes. The analysis used  
46 whole study population with some adjustment for confounders to estimate impact of  
47 high maternal-weight status on each outcome. We restricted the analysis to only  
48 single births and first pregnancies to ensure that the births in the sample are  
49 relatively independent. The dataset we were provided with combined underweight  
50 and normal weight women as normal BMI group. Using this as the reference group  
51  
52  
53  
54  
55  
56  
57  
58  
59  
60

1  
2  
3 might have strengthened the association between high maternal BMI and the  
4 pregnancy and neonatal outcomes considered. However, only a very small number  
5 of women are underweight during pregnancy in Scotland in recent years. Also, some  
6 studies differentiate between different obesity categories, but in this study the  
7 dataset we accessed did not differentiate these categories, and it was not possible to  
8 do this retrospectively; therefore all women with BMI of 30 or more were considered  
9 as having obesity. It is likely that differentiating morbid obesity, or obesity class II and  
10 III from women with obesity, would have generated additional insight, in the form of a  
11 full “dose response relationship”. The completeness of the recording of BMI  
12 increased during the study period (2008 to 2015) from 69% to 98%. Using data from  
13 the earlier years, when the BMI was missing more often, might have biased the  
14 study sample if BMI was not missing at random. The study included control for a  
15 limited set of confounders, due to data availability; inclusion of other relevant  
16 confounders could have strengthened the analysis. For example, variables such as  
17 ethnicity, previous caesarean sections, and time of birth were not available in the  
18 dataset which we accessed. Also, we could not analyse neonatal outcomes such as  
19 stillbirth, neonatal death and congenital anomaly because these outcomes are not  
20 completely ascertained in the dataset we used.  
21  
22  
23  
24  
25  
26  
27  
28  
29  
30  
31  
32  
33  
34  
35  
36  
37  
38  
39  
40  
41  
42  
43  
44  
45  
46  
47  
48  
49

## 50 **Conclusion**

51 This study has shown that women who were overweight, and especially those who  
52 are obese in Scotland are at greater risk of several pregnancy and delivery  
53 complications including gestational hypertension, gestational diabetes, pre-  
54 eclampsia, labour induction and Caesarean delivery. The risk of these conditions  
55 increases steadily with increasing BMI. Health professionals should be empowered  
56  
57  
58  
59  
60

1  
2  
3 and trained to deliver promising dietary and lifestyle interventions to women at risk of  
4  
5 overweight and obesity prior to conception, and control excessive weight gain in  
6  
7 pregnancy.  
8  
9

## 10 **References**

- 11  
12 1. Rooney BL, Schauburger CW. Excess pregnancy weight gain and long-term  
13  
14 obesity: one decade later. *Obstet Gynecol* 2002; **100(2)**: 245-252.
- 15  
16 2. Kumari P, Gupta M, Kahlon P, Malviya S. Association between high maternal  
17  
18 body mass index and fetomaternal Outcome. *J Obes Metab Res* 2014; **1**:  
19  
20 143-148.
- 21  
22 3. Poobalan AS, Aucott LS, Gurung T, Smith WC, Bhattacharya S. Obesity as  
23  
24 an independent risk factor for elective and emergency caesarean delivery in  
25  
26 nulliparous women – systematic review and meta-analysis of cohort studies.  
27  
28 *Obesity Reviews* 2009 10: 28-35. doi:10.1111/j.1467-789X.2008.00537.x
- 29  
30 4. Rahman MM, Abe SK, Kanda M, Narita S, Rahman MS, Bilano V, Ota E,  
31  
32 Gilmour S, Shibuya K. Maternal body mass index and the risk of birth and  
33  
34 maternal health outcomes in low- and middle-income countries: a systematic  
35  
36 review and meta-analysis. *Obesity Reviews* 2015; **16**: 758–770.
- 37  
38 5. Godfrey KM, Reynolds RM, Prescott SL, Nyirenda M, Jaddoe VVW, Eriksson  
39  
40 JG, Broekmann BFP. Influence of maternal obesity on the long-term health of  
41  
42 offspring. *Lancet Diabetes Endocrinol* 2017; **5**: 53–64.
- 43  
44 6. Morgan KL, Rahman MA, Hill RA, et al. Obesity in pregnancy: infant health  
45  
46 service utilisation and costs on the NHS. *BMJ Open* 2015;5:e008357.  
47  
48 doi:10.1136/bmjopen-2015- 008357.
- 49  
50 7. Doi L, Williams AJ, Frank J. How has child growth around adiposity rebound  
51  
52 altered in Scotland since 1990 and what are the risk factors for weight gain  
53  
54  
55  
56  
57  
58  
59  
60



- 1  
2  
3 using the Growing Up in Scotland birth cohort 1? *BMC Public Health* 2016;  
4  
5 **16**: 1081.  
6  
7  
8 8. Denison FC, Norwood P, Bhattacharya S, Duffy A, Mahmood T, Morris C,  
9  
10 Raja EA, Norman JE, Lee AJ, Scotland G. Association between maternal  
11  
12 body mass index during pregnancy, short-term morbidity, and increased  
13  
14 health service costs: a population-based study. *BJOG* 2014; **121**:72–82.  
15  
16  
17 9. Smith GCS, Shah I, Pell JP, Crossley JA, Dobbie R. Maternal Obesity in Early  
18  
19 Pregnancy and Risk of Spontaneous and Elective Preterm Deliveries: A  
20  
21 Retrospective Cohort Study, *American Journal of Public Health* 2007; **97**(1):  
22  
23 157-162.  
24  
25  
26 10. Information Service Division (2018). Scottish birth record.  
27  
28 [http://www.ndc.scot.nhs.uk/Data-Dictionary/SMR-Datasets/Scottish-Birth-](http://www.ndc.scot.nhs.uk/Data-Dictionary/SMR-Datasets/Scottish-Birth-Record/)  
29  
30 [Record/](http://www.ndc.scot.nhs.uk/Data-Dictionary/SMR-Datasets/Scottish-Birth-Record/)  
31  
32  
33 11. Cole TJ, Freeman JV, Preece MA. Body mass index reference curves for the  
34  
35 UK, 1990. *Arch Dis Child* 1995; **73**(1): 25–29.  
36  
37  
38 12. Freeman JV, Cole TJ, Chinn S, Jones PRM, White EM, Preece MA. Cross-  
39  
40 sectional stature and weight reference curves for the UK 1990. *Arch Dis Child*  
41  
42 1995; **73**(1):17–24.  
43  
44  
45 13. StataCorp. Stata statistical software: release 14. College Station: StataCorp  
46  
47 LP; 2015.  
48  
49  
50 14. Cedergren MI. Maternal morbid obesity and the risk of adverse pregnancy  
51  
52 outcome. *Obstetricians and Gynecologists* 2004; **103**: 219-224.  
53  
54  
55 15. Scott-Pillai R, Spence D, Cardwell C, Hunter A, Holmes V. The impact of body  
56  
57 mass index on maternal and neonatal outcomes: a retrospective study in a  
58  
59 UK obstetric population, 2004–2011. *BJOG* 2013; **120**: 932–939.  
60

- 1  
2  
3 16. O'Brien TE, Ray JG, Chan WS. Maternal body mass index and the risk of  
4  
5 preeclampsia: A systematic overview. *Epidemiology* 2003; **14**: 368-374.  
6  
7  
8 17. Shieh C, Cullen DL, Pike C, Pressler SJ. Intervention strategies for preventing  
9  
10 excessive gestational weight gain: systematic review and meta-analysis.  
11  
12 *Obesity Reviews* 2018; doi: 10.1111/obr.12691.  
13  
14  
15 18. Thangaratinam S, Rogozinska E, Jolly K, Glinkowski S, Roseboom T,  
16  
17 Tomlinson JW, Kunz R, Mol BW, Coomarasamy A, Khan KS. Effects of  
18  
19 interventions in pregnancy on maternal weight and obstetric outcomes: Meta-  
20  
21 analysis of randomised evidence. *BMJ*. 2012; **344**: e2088.  
22  
23  
24 19. Althabe F, Sosa C, Belizán JM, Gibbons L, Jacquerioz F, Bergel E. Cesarean  
25  
26 section rates and maternal and neonatal mortality in low-, medium-, and high-  
27  
28 income countries: an ecological study. *Birth* 2006; **33(4)**: 270-277.  
29  
30  
31 20. Ellis JA, Brown CM, Barger B, Carlson NS. (2019), Influence of Maternal  
32  
33 Obesity on Labor Induction: A Systematic Review and Meta-Analysis. *Journal*  
34  
35 *of Midwifery & Women's Health*, 2019; **64**: 55-67. doi:[10.1111/jmwh.12935](https://doi.org/10.1111/jmwh.12935)  
36  
37  
38  
39  
40 21. Rezaie M, Shahoe R, Shahghebi S. The effect of maternal body mass index  
41  
42 on the delivery route in nulliparous women. *Journal of Public Health and*  
43  
44 *Epidemiology* 2013; **5(8)**: 346-350.  
45  
46  
47 22. Health Improvement Scotland (2009). Pathways for maternity care.  
48  
49 <http://www.healthcareimprovementscotland.org/default.aspx?page=12536>  
50  
51  
52 23. Abhyankar P, Cheyne H, Maxwell M, McCourt C. A realist evaluation of a  
53  
54 normal birth programme. *Evidence Based Midwifery* 2013;  
55  
56 [https://www.rcm.org.uk/learning-and-career/learning-and-research/ebm-](https://www.rcm.org.uk/learning-and-career/learning-and-research/ebm-articles/a-realist-evaluation-of-a-normal-birth)  
57  
58 [articles/a-realist-evaluation-of-a-normal-birth.](https://www.rcm.org.uk/learning-and-career/learning-and-research/ebm-articles/a-realist-evaluation-of-a-normal-birth)  
59  
60

- 1  
2  
3 24. Cheyne H, Abhyankar P, McCourt C. Empowering change: realist evaluation  
4 of a Scottish Government programme to support normal birth. *Midwifery* 2013;  
5  
6  
7  
8 **29**: 1110–1121.  
9
- 10 25. Surkan PJ, Hsieh CC, Johansson AL, Dickman PW, Cnattingius  
11  
12  
13  
14 S. Reasons for increasing trends in large for gestational age  
15  
16  
17  
18 births. *Obstet Gynecol* 2004; **104**:720–6.  
19  
20  
21  
22 [doi:10.1097/01.AOG.0000141442.59573.cd](https://doi.org/10.1097/01.AOG.0000141442.59573.cd)  
23  
24
- 25 26. McDonald SD, Han Z, Mulla S, Beyene J. Overweight and obesity in  
26 mothers and risk of preterm birth and low birth weight infants: systematic  
27  
28  
29 review and meta-analyses *BMJ* 2010; **341**:c3428.  
30  
31
- 32 27. Hendler I, Goldenberg RL, Mercer BM, et al. The Preterm Prediction  
33 Study: association between maternal body mass index and spontaneous and  
34  
35 indicated pre-term birth. *Am J Obstet Gynecol.* 2005; **192**:882–886.  
36  
37  
38  
39  
40

## 41 Funding

42 This work was funded by the SCPHRP core grant from the Medical Research  
43 Council (Grant Number MR/K023209/1) and the Chief Scientist Office of Scotland.  
44  
45  
46  
47  
48 AJW is supported by the European Centre for Environment and Human Health,  
49  
50 University of Exeter. LM is supported by the Farr Institute @ Scotland, which is  
51  
52 supported by a 10-funder consortium: Arthritis Research UK, the British Heart  
53  
54 Foundation, Cancer Research UK, the Economic and Social Research Council, the  
55  
56 Engineering and Physical Sciences Research Council, the Medical Research  
57  
58 Council, the National Institute of Health Research, the National Institute for Social  
59  
60

Care and Health Research (Welsh Assembly Government), the Chief Scientist Office (Scottish Government Health Directorates), (MRC Grant No: MR/K007017/1). The funders played no role in the conceptualisation or realisation of the research and no role in the decision to submit it for publication.

### **Competing interest**

The authors declare that they have no competing interests.

### **Data sharing**

Data used was categorised as confidential data release by the Electronic Data Research and Innovation Service of the Information Services Division, NHS National Services Scotland.

### **Acknowledgements**

The authors are grateful to the Electronic Data Research and Innovation Service of the Information Services Division, NHS National Services Scotland for providing the data used in this paper.

### **Authors' contributions**

LD, AJW and JF conceived the original idea for the study and obtained the data. AJW led the statistical analysis with support from LD, LM and JF. LD wrote the first draft of the paper and all authors revised successive drafts and approved the final manuscript.

## Supplementary file 1: Description of data fields used in the study

| Variable Name       | Database Source      | Variable Description/Values                                                                                                                                                                                                                       | Notes                                                                                                                                                                                                                       |
|---------------------|----------------------|---------------------------------------------------------------------------------------------------------------------------------------------------------------------------------------------------------------------------------------------------|-----------------------------------------------------------------------------------------------------------------------------------------------------------------------------------------------------------------------------|
| Mother_ID           | N/A - study specific | Unique mother identifier                                                                                                                                                                                                                          | 1516-0613/' followed by an anonymous identifier                                                                                                                                                                             |
| Baby_ID             | N/A - study specific | Unique baby identifier                                                                                                                                                                                                                            | Mother_ID followed by delivery sequence number followed by a baby sequence number. The baby sequence number for multiple babies from same delivery not necessarily in correct order due to missing CHI numbers.             |
| Delivery_Seq_No     | N/A - study specific | Delivery sequence number of mother                                                                                                                                                                                                                |                                                                                                                                                                                                                             |
| Gest_Diabetes       | SMR02                | <b>1:</b> Yes, Gestational diabetes (diagnosed during this pregnancy)<br><b>0:</b> Yes, Pre-existing diabetes (diagnosed before pregnancy) & No (no diabetes during this pregnancy)<br><b>Missing:</b> Yes, Time of diagnosis unknown & Not Known | <a href="http://www.ndc.scot.nhs.uk/Dictionary-A-Z/Definitions/index.asp?Search=D&amp;ID=214&amp;Title=Diabetes">http://www.ndc.scot.nhs.uk/Dictionary-A-Z/Definitions/index.asp?Search=D&amp;ID=214&amp;Title=Diabetes</a> |
| Gest_Hypertension   | SMR02/SMR01          | <b>1:</b> ICD 10 code O13.X<br><b>0:</b> All other codes                                                                                                                                                                                          | Flagged codes cover gestational hypertension                                                                                                                                                                                |
| Pre_Eclampsia       | SMR02/SMR01          | <b>1:</b> ICD 10 code O14._<br><b>0:</b> All other codes                                                                                                                                                                                          | Flagged codes cover pre-eclampsia                                                                                                                                                                                           |
| Placental_Abruption | SMR02/SMR01          | <b>1:</b> ICD 10 code O45._<br><b>0:</b> All other codes                                                                                                                                                                                          | Flagged codes cover placental abruption                                                                                                                                                                                     |
| Placental_Praevia   | SMR02/SMR01          | <b>1:</b> ICD 10 code O44._<br><b>0:</b> All other codes                                                                                                                                                                                          | Flagged codes cover placenta praevia                                                                                                                                                                                        |

|                        |             |                                                                                                                                  |                                                                                                                                                                                                                                                                             |
|------------------------|-------------|----------------------------------------------------------------------------------------------------------------------------------|-----------------------------------------------------------------------------------------------------------------------------------------------------------------------------------------------------------------------------------------------------------------------------|
| Postpartum_Haemorrhage | SMR02/SMR01 | <b>1:</b> ICD 10 code O72._<br><b>0:</b> All other codes                                                                         | Flagged codes cover postpartum haemorrhage                                                                                                                                                                                                                                  |
| Caesarean_Delivery     | SMR02       | <b>1:</b> Elective (planned) caesarean section & Emergency and unspecified caesarean section<br><b>0:</b> All other codes        | <a href="http://www.ndc.scot.nhs.uk/Dictionary-A-Z/Definitions/index.asp?Search=M&amp;ID=322&amp;Title=Mode of Delivery - Babies 1 to 3">http://www.ndc.scot.nhs.uk/Dictionary-A-Z/Definitions/index.asp?Search=M&amp;ID=322&amp;Title=Mode of Delivery - Babies 1 to 3</a> |
| Labour_Induction       | SMR02       | <b>1:</b> 1-8 - Induction of labour codes<br><b>0:</b> 0, None<br><b>Missing:</b> 9, Not known                                   | <a href="http://www.ndc.scot.nhs.uk/Dictionary-A-Z/Definitions/index.asp?Search=I&amp;ID=295&amp;Title=Induction of Labour">http://www.ndc.scot.nhs.uk/Dictionary-A-Z/Definitions/index.asp?Search=I&amp;ID=295&amp;Title=Induction of Labour</a>                           |
| SGA                    | SMR02       | <b>1:</b> Birthweight ≤10th percentile<br><b>0:</b> Birthweight >10th percentile                                                 | Small for gestational age flag                                                                                                                                                                                                                                              |
| LGA                    | SMR02       | <b>1:</b> Birthweight ≥90th percentile<br><b>0:</b> Birthweight <90th percentile                                                 | Large for gestational age flag                                                                                                                                                                                                                                              |
| Preterm_Delivery       | SMR02       | <b>1:</b> Estimated gestation < 37 weeks<br><b>0:</b> Estimated gestation ≥ 37 weeks and ≤ 42 weeks<br><b>Missing:</b> otherwise | <a href="http://www.ndc.scot.nhs.uk/Dictionary-A-Z/Definitions/index.asp?Search=E&amp;ID=242&amp;Title=Estimated Gestation">http://www.ndc.scot.nhs.uk/Dictionary-A-Z/Definitions/index.asp?Search=E&amp;ID=242&amp;Title=Estimated Gestation</a>                           |
| Postterm_Delivery      | SMR02       | <b>1:</b> Estimated gestation > 42 weeks<br><b>0:</b> Estimated gestation ≥ 37 weeks and ≤ 42 weeks<br><b>Missing:</b> otherwise | <a href="http://www.ndc.scot.nhs.uk/Dictionary-A-Z/Definitions/index.asp?Search=E&amp;ID=242&amp;Title=Estimated Gestation">http://www.ndc.scot.nhs.uk/Dictionary-A-Z/Definitions/index.asp?Search=E&amp;ID=242&amp;Title=Estimated Gestation</a>                           |
| Apgar_Score            | SMR02       | <b>1:</b> Apgar score at 5 mins < 7<br><b>0:</b> Apgar score at 5 mins ≥ 7                                                       | <a href="http://www.ndc.scot.nhs.uk/Dictionary-A-Z/Definitions/index.asp?Search=A&amp;ID=88&amp;Title=Apgar Score - Babies 1 to 3">http://www.ndc.scot.nhs.uk/Dictionary-A-Z/Definitions/index.asp?Search=A&amp;ID=88&amp;Title=Apgar Score - Babies 1 to 3</a>             |
| Maternal_Obesity       | SMR02       | <b>1:</b> Obese status<br><b>0:</b> Overweight, Healthy or underweight status                                                    | Adults with BMI ≥ 30 classed as obese. BMI of girls aged 2 - 19 years old standardized using UK1990 growth reference values and z-score ≥ 6/3 (98th centile) classed as obese.                                                                                              |

|                             |            |                                                                                 |                                                                                                                                                                                                                                                                           |
|-----------------------------|------------|---------------------------------------------------------------------------------|---------------------------------------------------------------------------------------------------------------------------------------------------------------------------------------------------------------------------------------------------------------------------|
| Maternal_Overweight_Obesity | SMR02      | <b>1:</b> Overweight or Obese status<br><b>0:</b> Healthy or underweight status | Adults with BMI $\geq 25$ classed as overweight or obese. BMI of girls aged 2 - 19 years old standardized using UK1990 growth reference values and z-score $\geq 4/3$ (91st centile) classed as overweight or obese.                                                      |
| Age                         | SMR02      | Age of mother at delivery (in years)                                            |                                                                                                                                                                                                                                                                           |
| Parity                      | SMR02      | Total number of previous pregnancies                                            | <a href="http://www.ndc.scot.nhs.uk/Dictionary-A-Z/Definitions/index.asp?Search=P&amp;ID=409&amp;Title=Previous Pregnancies">http://www.ndc.scot.nhs.uk/Dictionary-A-Z/Definitions/index.asp?Search=P&amp;ID=409&amp;Title=Previous Pregnancies</a>                       |
| Deprivation                 | SMR02      | Carstairs 2001 quintiles for Scotland                                           | 1=least deprived; 5=most deprived                                                                                                                                                                                                                                         |
| Smoking_Status              | SMR02      | <b>1:</b> Yes<br><b>0:</b> No<br><b>Missing:</b> Not known                      | <a href="http://www.ndc.scot.nhs.uk/Dictionary-A-Z/Definitions/index.asp?Search=S&amp;ID=456&amp;Title=Smoker During Pregnancy">http://www.ndc.scot.nhs.uk/Dictionary-A-Z/Definitions/index.asp?Search=S&amp;ID=456&amp;Title=Smoker During Pregnancy</a>                 |
| Multiple_births             | SMR02      | <b>1:</b> More than one birth this pregnancy<br><b>0:</b> Single birth          | <a href="http://www.ndc.scot.nhs.uk/Dictionary-A-Z/Definitions/index.asp?Search=N&amp;ID=349&amp;Title=Number of Births this Pregnancy">http://www.ndc.scot.nhs.uk/Dictionary-A-Z/Definitions/index.asp?Search=N&amp;ID=349&amp;Title=Number of Births this Pregnancy</a> |
| Multiple_births_in_NRS      | NRS Births | <b>1:</b> Multiple babies found for this mother's delivery in NRS Births        | Multiple babies recorded in NRS Births but only a single baby recorded in SMR02                                                                                                                                                                                           |
| Previous_Caesarean_section  | SMR02      | <b>1:</b> More than zero<br><b>0:</b> Zero                                      | <a href="http://www.ndc.scot.nhs.uk/Dictionary-A-Z/Definitions/index.asp?Search=P&amp;ID=406&amp;Title=Previous Caesarean Sections">http://www.ndc.scot.nhs.uk/Dictionary-A-Z/Definitions/index.asp?Search=P&amp;ID=406&amp;Title=Previous Caesarean Sections</a>         |

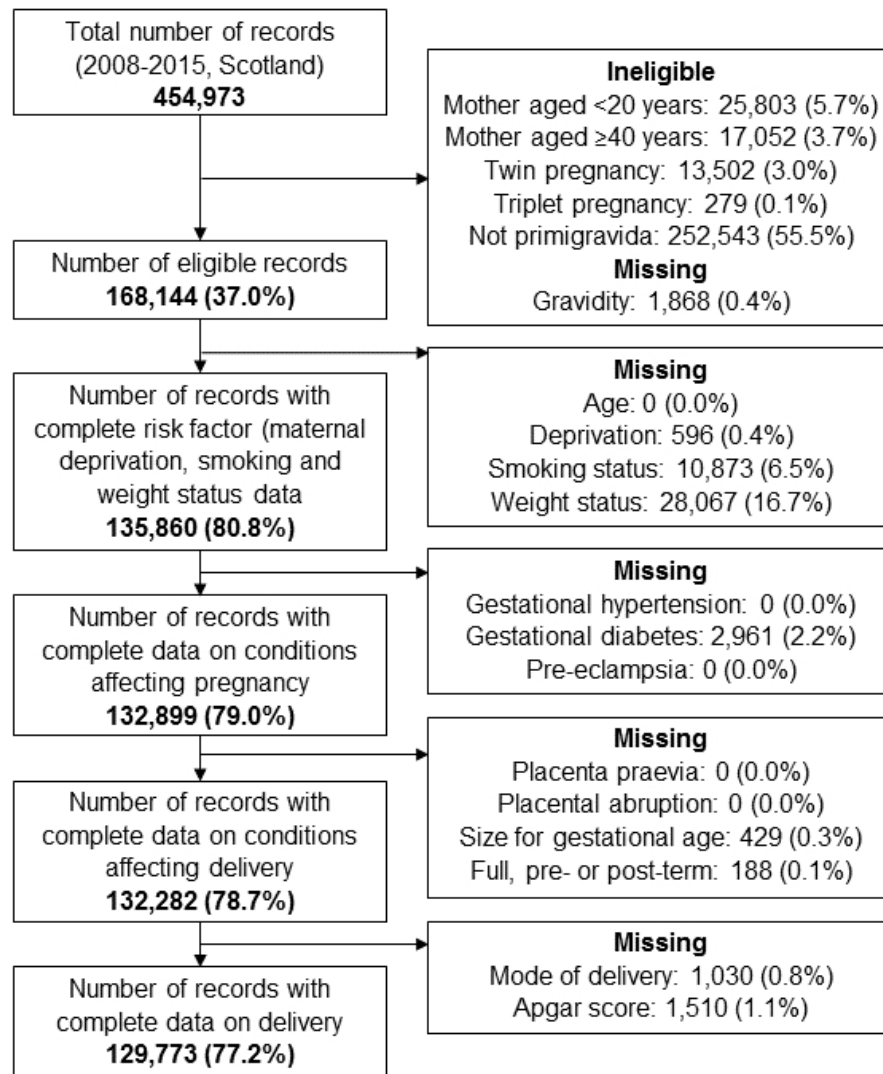



## STROBE (Strengthening The Reporting of OBServational Studies in Epidemiology) Checklist

A checklist of items that should be included in reports of observational studies. You must report the page number in your manuscript where you consider each of the items listed in this checklist. If you have not included this information, either revise your manuscript accordingly before submitting or note N/A.

**Note:** An Explanation and Elaboration article discusses each checklist item and gives methodological background and published examples of transparent reporting. The STROBE checklist is best used in conjunction with this article (freely available on the Web sites of PLoS Medicine at <http://www.plosmedicine.org/>, Annals of Internal Medicine at <http://www.annals.org/>, and Epidemiology at <http://www.epidem.com/>). Information on the STROBE Initiative is available at [www.strobe-statement.org](http://www.strobe-statement.org).

| Section and Item     | Item No. | Recommendation                                                                                                                                                                                                                                                                                                                                                                                                                                                                 | Reported on Page No. |
|----------------------|----------|--------------------------------------------------------------------------------------------------------------------------------------------------------------------------------------------------------------------------------------------------------------------------------------------------------------------------------------------------------------------------------------------------------------------------------------------------------------------------------|----------------------|
| Title and Abstract   | 1        | (a) Indicate the study's design with a commonly used term in the title or the abstract                                                                                                                                                                                                                                                                                                                                                                                         |                      |
|                      |          | (b) Provide in the abstract an informative and balanced summary of what was done and what was found                                                                                                                                                                                                                                                                                                                                                                            |                      |
| <b>Introduction</b>  |          |                                                                                                                                                                                                                                                                                                                                                                                                                                                                                |                      |
| Background/Rationale | 2        | Explain the scientific background and rationale for the investigation being reported                                                                                                                                                                                                                                                                                                                                                                                           |                      |
| Objectives           | 3        | State specific objectives, including any prespecified hypotheses                                                                                                                                                                                                                                                                                                                                                                                                               |                      |
| <b>Methods</b>       |          |                                                                                                                                                                                                                                                                                                                                                                                                                                                                                |                      |
| Study Design         | 4        | Present key elements of study design early in the paper                                                                                                                                                                                                                                                                                                                                                                                                                        |                      |
| Setting              | 5        | Describe the setting, locations, and relevant dates, including periods of recruitment, exposure, follow-up, and data collection                                                                                                                                                                                                                                                                                                                                                |                      |
| Participants         | 6        | (a) <i>Cohort study</i> —Give the eligibility criteria, and the sources and methods of selection of participants. Describe methods of follow-up<br><br><i>Case-control study</i> —Give the eligibility criteria, and the sources and methods of case ascertainment and control selection. Give the rationale for the choice of cases and controls<br><br><i>Cross-sectional study</i> —Give the eligibility criteria, and the sources and methods of selection of participants |                      |
|                      |          | (b) <i>Cohort study</i> —For matched studies, give matching criteria and number of exposed and unexposed<br><br><i>Case-control study</i> —For matched studies, give matching criteria and the number of controls per case                                                                                                                                                                                                                                                     |                      |
| Variables            | 7        | Clearly define all outcomes, exposures, predictors, potential confounders, and effect modifiers. Give diagnostic criteria, if applicable                                                                                                                                                                                                                                                                                                                                       |                      |

| Section and Item             | Item No. | Recommendation                                                                                                                                                                                                                                                                                                    | Reported on Page No. |
|------------------------------|----------|-------------------------------------------------------------------------------------------------------------------------------------------------------------------------------------------------------------------------------------------------------------------------------------------------------------------|----------------------|
| Data Sources/<br>Measurement | 8*       | For each variable of interest, give sources of data and details of methods of assessment (measurement). Describe comparability of assessment methods if there is more than one group                                                                                                                              |                      |
| Bias                         | 9        | Describe any efforts to address potential sources of bias                                                                                                                                                                                                                                                         |                      |
| Study Size                   | 10       | Explain how the study size was arrived at                                                                                                                                                                                                                                                                         |                      |
| Quantitative Variables       | 11       | Explain how quantitative variables were handled in the analyses. If applicable, describe which groupings were chosen and why                                                                                                                                                                                      |                      |
| Statistical Methods          | 12       | (a) Describe all statistical methods, including those used to control for confounding                                                                                                                                                                                                                             |                      |
|                              |          | (b) Describe any methods used to examine subgroups and interactions                                                                                                                                                                                                                                               |                      |
|                              |          | (c) Explain how missing data were addressed                                                                                                                                                                                                                                                                       |                      |
|                              |          | (d) <i>Cohort study</i> —If applicable, explain how loss to follow-up was addressed<br><br><i>Case-control study</i> —If applicable, explain how matching of cases and controls was addressed<br><br><i>Cross-sectional study</i> —If applicable, describe analytical methods taking account of sampling strategy |                      |
|                              |          | (e) Describe any sensitivity analyses                                                                                                                                                                                                                                                                             |                      |
| <b>Results</b>               |          |                                                                                                                                                                                                                                                                                                                   |                      |
| Participants                 | 13*      | (a) Report numbers of individuals at each stage of study—eg numbers potentially eligible, examined for eligibility, confirmed eligible, included in the study, completing follow-up, and analysed                                                                                                                 |                      |
|                              |          | (b) Give reasons for non-participation at each stage                                                                                                                                                                                                                                                              |                      |
|                              |          | (c) Consider use of a flow diagram                                                                                                                                                                                                                                                                                |                      |
| Descriptive Data             | 14*      | (a) Give characteristics of study participants (eg demographic, clinical, social) and information on exposures and potential confounders                                                                                                                                                                          |                      |
|                              |          | (b) Indicate number of participants with missing data for each variable of interest                                                                                                                                                                                                                               |                      |
|                              |          | (c) <i>Cohort study</i> —Summarise follow-up time (eg, average and total amount)                                                                                                                                                                                                                                  |                      |
| Outcome Data                 | 15*      | <i>Cohort study</i> —Report numbers of outcome events or summary measures over time                                                                                                                                                                                                                               |                      |
|                              |          | <i>Case-control study</i> —Report numbers in each exposure category, or summary measures of exposure                                                                                                                                                                                                              |                      |
|                              |          | <i>Cross-sectional study</i> —Report numbers of outcome events or summary measures                                                                                                                                                                                                                                |                      |

| Section and Item         | Item No. | Recommendation                                                                                                                                                                                               | Reported on Page No. |
|--------------------------|----------|--------------------------------------------------------------------------------------------------------------------------------------------------------------------------------------------------------------|----------------------|
| Main Results             | 16       | (a) Give unadjusted estimates and, if applicable, confounder-adjusted estimates and their precision (eg, 95% confidence interval). Make clear which confounders were adjusted for and why they were included |                      |
|                          |          | (b) Report category boundaries when continuous variables were categorized                                                                                                                                    |                      |
|                          |          | (c) If relevant, consider translating estimates of relative risk into absolute risk for a meaningful time period                                                                                             |                      |
| Other Analyses           | 17       | Report other analyses done—eg analyses of subgroups and interactions, and sensitivity analyses                                                                                                               |                      |
| <b>Discussion</b>        |          |                                                                                                                                                                                                              |                      |
| Key Results              | 18       | Summarise key results with reference to study objectives                                                                                                                                                     |                      |
| Limitations              | 19       | Discuss limitations of the study, taking into account sources of potential bias or imprecision. Discuss both direction and magnitude of any potential bias                                                   |                      |
| Interpretation           | 20       | Give a cautious overall interpretation of results considering objectives, limitations, multiplicity of analyses, results from similar studies, and other relevant evidence                                   |                      |
| Generalisability         | 21       | Discuss the generalisability (external validity) of the study results                                                                                                                                        |                      |
| <b>Other Information</b> |          |                                                                                                                                                                                                              |                      |
| Funding                  | 22       | Give the source of funding and the role of the funders for the present study and, if applicable, for the original study on which the present article is based                                                |                      |

\*Give information separately for cases and controls in case-control studies and, if applicable, for exposed and unexposed groups in cohort and cross-sectional studies.

**Once you have completed this checklist, please save a copy and upload it as part of your submission. DO NOT include this checklist as part of the main manuscript document. It must be uploaded as a separate file.**

# BMJ Open

## A cohort study of high maternal Body Mass Index and the risk of adverse pregnancy and delivery outcomes in Scotland

|                                 |                                                                                                                                                                                                                                                                                                                                                    |
|---------------------------------|----------------------------------------------------------------------------------------------------------------------------------------------------------------------------------------------------------------------------------------------------------------------------------------------------------------------------------------------------|
| Journal:                        | <i>BMJ Open</i>                                                                                                                                                                                                                                                                                                                                    |
| Manuscript ID                   | bmjopen-2018-026168.R4                                                                                                                                                                                                                                                                                                                             |
| Article Type:                   | Original research                                                                                                                                                                                                                                                                                                                                  |
| Date Submitted by the Author:   | 22-Dec-2019                                                                                                                                                                                                                                                                                                                                        |
| Complete List of Authors:       | Doi, Lawrence; University of Edinburgh, Scottish Collaboration for Public Health Research and Policy, School of Health in Social Science<br>Williams, Andrew James; University of Exeter<br>Marryat, Louise; University of Edinburgh, SCPHRP<br>Frank, John; University of Edinburgh, Scottish Collaboration for Public Health Research and Policy |
| <b>Primary Subject Heading</b>: | Obstetrics and gynaecology                                                                                                                                                                                                                                                                                                                         |
| Secondary Subject Heading:      | Epidemiology, Paediatrics, Public health, Reproductive medicine, Health policy                                                                                                                                                                                                                                                                     |
| Keywords:                       | OBSTETRICS, EPIDEMIOLOGY, PUBLIC HEALTH                                                                                                                                                                                                                                                                                                            |
|                                 |                                                                                                                                                                                                                                                                                                                                                    |

SCHOLARONE™  
Manuscripts



I, the Submitting Author has the right to grant and does grant on behalf of all authors of the Work (as defined in the below author licence), an exclusive licence and/or a non-exclusive licence for contributions from authors who are: i) UK Crown employees; ii) where BMJ has agreed a CC-BY licence shall apply, and/or iii) in accordance with the terms applicable for US Federal Government officers or employees acting as part of their official duties; on a worldwide, perpetual, irrevocable, royalty-free basis to BMJ Publishing Group Ltd ("BMJ") its licensees and where the relevant Journal is co-owned by BMJ to the co-owners of the Journal, to publish the Work in this journal and any other BMJ products and to exploit all rights, as set out in our [licence](#).

The Submitting Author accepts and understands that any supply made under these terms is made by BMJ to the Submitting Author unless you are acting as an employee on behalf of your employer or a postgraduate student of an affiliated institution which is paying any applicable article publishing charge ("APC") for Open Access articles. Where the Submitting Author wishes to make the Work available on an Open Access basis (and intends to pay the relevant APC), the terms of reuse of such Open Access shall be governed by a Creative Commons licence – details of these licences and which [Creative Commons](#) licence will apply to this Work are set out in our licence referred to above.

Other than as permitted in any relevant BMJ Author's Self Archiving Policies, I confirm this Work has not been accepted for publication elsewhere, is not being considered for publication elsewhere and does not duplicate material already published. I confirm all authors consent to publication of this Work and authorise the granting of this licence.

# A cohort study of high maternal Body Mass Index and the risk of adverse pregnancy and delivery outcomes in Scotland

Lawrence Doi<sup>1\*</sup>, Andrew James Williams<sup>2</sup>, Louise Marryat<sup>3,4</sup>, John Frank<sup>3,5</sup>

\*Correspondence: [larry.doi@ed.ac.uk](mailto:larry.doi@ed.ac.uk)

<sup>1</sup>Scottish Collaboration for Public Health Research and Policy, School of Health in Social Science, University of Edinburgh, Doorway 6, Old Medical School, Teviot Place, EH8 9AG, UK.

<sup>2</sup>European Centre for Environment and Human Health, University of Exeter Medical School, Knowledge Spa, Royal Cornwall Hospital, Truro, Cornwall TR1 3HD, UK.

<sup>3</sup>Farr Institute at Scotland, University of Edinburgh, Nine, Edinburgh BioQuarter, 9 Little France Road, Edinburgh EH16 4UX, UK.

<sup>4</sup>Centre for Clinical Brain Sciences, University of Edinburgh, Royal Edinburgh Hospital, Kennedy Tower, Morningside Park, Edinburgh EH10 5HF, UK.

<sup>5</sup>Usher Institute of Population Health Sciences and Informatics, University of Edinburgh, Doorway 1, Old Medical School, Teviot Place, EH8 9AG, UK.

## Abstract

**Objective:** To examine the association between high maternal weight status and complications during pregnancy and delivery.

**Setting:** Scotland

**Participants:** Data from 132,899 first time singleton deliveries in Scotland between 2008 and 2015 were used. Women with overweight and obesity were compared with women with normal weight. Associations between maternal body mass index and complications during pregnancy and delivery were evaluated.

**Outcome measures:** Gestational diabetes, gestational hypertension, pre-eclampsia, placenta praevia, placental abruption, induction of labour, elective and emergency caesarean sections, pre-term delivery, post-term delivery, low Apgar score, small for gestational age and large for gestational age.

**Results:** In the multivariable models controlling for potential confounders, we found that, compared with women with normal weight, the odds of the following outcomes were significantly increased for women with overweight and obesity [overweight adjusted odds ratio; 95% confidence interval, followed by the same for women with obesity]: gestational hypertension [1.61; 1.49-1.74], [2.48; 2.30-2.68]; gestational diabetes [2.14; 1.86-2.46], [8.25; 7.33-9.30]; pre-eclampsia [1.46; 1.32-1.63] [2.07; 1.87-2.29]; labour induction [1.28; 1.23-1.33], [1.69; 1.62-1.76] and emergency caesarean section [1.82; 1.74-1.91], [3.14; 3.00-3.29].

**Conclusions:** Women with overweight and obesity in Scotland are at greater odds of adverse pregnancy and delivery outcomes. The odds of these conditions increases with increasing body mass index. Health professionals should be

1  
2  
3 empowered and trained to deliver promising dietary and lifestyle interventions to  
4 women at risk of overweight and obesity prior to conception, and control excessive  
5 weight gain in pregnancy.  
6  
7  
8  
9  
10  
11  
12  
13  
14

### Strengths and limitations of this study

- This study used a large, retrospectively accessed but cohort-structured, national database covering some of the major maternal and neonatal outcomes in Scotland over eight recent years.
  - Analyses were adjusted for some of the key potential confounders to estimate impact of high maternal-weight status on each outcome.
  - All women with BMI of 30 kg/m<sup>2</sup> or more were considered as having obesity; it is likely that differentiating morbid obesity or obesity class II and III from obesity would have generated more precise estimates.
  - The completeness of the recording of BMI increased during the study period (2008 to 2015) from 69% to 98%. Using data from the earlier years when the BMI was missing more often might have biased the study sample if it was the case that BMI was not missing at random.
- 15  
16  
17  
18  
19  
20  
21  
22  
23  
24  
25  
26  
27  
28  
29  
30  
31  
32  
33  
34  
35  
36  
37  
38  
39  
40  
41  
42  
43  
44  
45  
46  
47  
48  
49  
50  
51  
52  
53  
54  
55  
56  
57  
58  
59  
60



## Introduction

The increasing global prevalence of overweight and obesity makes it more likely that a growing number of women with high body mass index (BMI) are becoming pregnant. High maternal BMI during pregnancy has immediate implications for pregnancy complications as well as long-term health implications for both women and offspring (1,2). For instance, in terms of pregnancy complications, a systematic review and meta-analysis involving 11 cohort studies found that caesarean delivery risk increased by 50% in pregnant women who were overweight and was more than double for women who were obese compared with women with normal BMI (3). High BMI during pregnancy could lead to future chronic disease such as diabetes, heart disease and hypertension (4). Surviving offspring are also more prone to long-term obesity, hypertension, coronary heart disease, diabetes, stroke and asthma (4,5). Both immediate and long-term health implications of high BMI during pregnancy have economic consequences. For example, a recent study examining infant health utilisation and costs on the NHS in the UK of infants born to women with overweight or obesity found that total mean additional resource cost for infants born to women who are overweight was £65.13, and £1138.11 for infants born to women who are obese (6).

Maternal weights are currently high in Scotland: a recent study reported that 31.5% of mothers were overweight and a further 23.6% were affected by obesity (7). A retrospective cohort study using Scottish obstetric data from 2003 to 2010 examined the impact of maternal BMI on clinical complications, inpatient admissions, and additional short-term costs to the NHS in Scotland revealed that maternal BMI influences maternal and neonatal morbidity, the number and duration of maternal

1  
2  
3 and neonatal admissions, and health service costs (8). The study also showed that in  
4  
5 comparison with women of normal weight, women who were overweight, obese, or  
6  
7 severely obese had an increased risk of essential hypertension [1.87 (1.18–2.96),  
8  
9 11.90 (7.18–19.72), and 36.10 (18.33–71.10)], pregnancy-induced hypertension  
10  
11 [1.76 (1.60–1.95), 2.98 (2.65–3.36), and 4.48 (3.57–5.63)], gestational diabetes [3.39  
12  
13 (2.30–4.99), 11.90 (7.54–18.79), and 67.40 (37.84–120.03)], emergency caesarean  
14  
15 section [1.94 (1.71–2.21), 3.40 (2.91–3.96), and 14.34 (9.38–21.94)], and elective  
16  
17 caesarean section [2.06 (1.84–2.30), 4.61 (4.06–5.24), and 17.92 (13.20–24.34)] (8).  
18  
19 Smith et al. (9), using data from a retrospective cohort study of 187,290 women in  
20  
21 Scotland to examine the risk of maternal obesity in early pregnancy and the risk of  
22  
23 pre-term delivery, found that among nulliparous women, the risk of an elective pre-  
24  
25 term delivery increased with increasing BMI. The study also observed that 40% of  
26  
27 morbidly obese nulliparous women who experienced an elective pre-term delivery  
28  
29 had been diagnosed with pre-eclampsia, in contrast with only 2.6% of the remaining  
30  
31 study population (9). Maternal obesity has also been linked to low Apgar score and  
32  
33 pre-term and post-term delivery as well as the risk of intrapartum complications, such  
34  
35 as placenta praevia and placental abruption (2,10). It is likely that any risk of  
36  
37 intrapartum complications may necessitate labour induction or more frequent  
38  
39 caesarean delivery.  
40  
41  
42  
43  
44  
45  
46  
47  
48

49 In the current study, we hypothesised, based on previous studies elsewhere, that  
50  
51 women with obesity and their babies experience higher rates of virtually all perinatal  
52  
53 complications, which are routinely collected in Scotland, except perhaps low birth  
54  
55 weight (due to the macrosomia effect of overt or covert gestational diabetes), and  
56  
57 that women with overweight and their babies experience an excess risk of these  
58  
59  
60

1  
2  
3 same outcomes, but one not as high as women with obesity and their offspring.  
4  
5 Therefore, our aim was to use more recent data to examine the associations  
6  
7 between high maternal BMI and complications during pregnancy and delivery in  
8  
9 Scotland. Understanding of these associations can highlight areas where prevention  
10  
11 strategies could be targeted.  
12  
13  
14  
15  
16

## 17 **Methods**

### 20 ***Study population and data sources***

21  
22  
23 This retrospective cohort study used data from 132,899 first time mothers who gave  
24  
25 birth to only one child in Scotland between January 2008 and December 2015. The  
26  
27 women and infants were identified within three electronic medical record databases:  
28  
29 the Scottish Morbidity Record (SMR) 01 and 02 and Scottish Birth Record (SBR).  
30  
31 SMR01 is generated for patients receiving inpatient or day care in the General or  
32  
33 Acute specialties, whilst SMR02 is generated for patients receiving inpatient or day  
34  
35 care in the Obstetric Specialties. The SBR records all of a baby's neonatal care in  
36  
37 Scotland. Relevant outcome variables are recorded in these databases according to  
38  
39 the World Health Organization's International Classification of Diseases, Tenth  
40  
41 Revision (ICD-10) or NHS Scotland classifications (11). Further description of the  
42  
43 content of these databases is available (12) and in the supplemental file 1.. The  
44  
45 study was designed as a clinical audit so did not require approval from a Research  
46  
47 Ethics Committee. However, approval was obtained from the Public Benefit and  
48  
49 Privacy Panel via the national Electronic Data Research and Innovation Service to  
50  
51 use the anonymised data collected by these registries. As a clinical audit making  
52  
53 secondary use of anonymised electronic patient records, it was necessary to account  
54  
55  
56  
57  
58  
59  
60

1  
2  
3 for missing data which was relevant to this research study (see the supplemental file  
4  
5 2 for the flow diagram illustrating how the final sample size was reached. The large  
6  
7 number of variables involved in this study and a low likelihood that missingness was  
8  
9 at random meant that imputation methods would have been complicated and a  
10  
11 complete case analysis was more suitable for this population-wide study.  
12  
13

### 14 15 ***Patient and public involvement*** 16

17  
18 Patients were not involved in the design, analyses and interpretation of this study.  
19

### 20 21 ***Exposure variable*** 22

23  
24 More than 80% of pregnant women in Scotland present themselves for antenatal  
25  
26 care during the first trimester of their pregnancy (13). Height and weight are usually  
27  
28 measured by the midwife at the first antenatal visit, typically before 12 weeks of  
29  
30 pregnancy. Body mass index (BMI) was calculated using the formula weight  
31  
32 (kg)/height (m<sup>2</sup>). BMI categories were defined as normal (<25 kg/m<sup>2</sup>), overweight  
33  
34 (≥25 kg/m<sup>2</sup> to <30 kg/m<sup>2</sup>) and obese (≥30 kg/m<sup>2</sup>). BMI completeness was 69% in 2008  
35  
36 but this increased gradually to 87% in 2011 when recording of weight and height  
37  
38 became mandatory. By 2015 BMI completeness was 98%.  
39  
40  
41  
42  
43  
44  
45  
46

### 47 48 ***Outcomes*** 49

50 Outcome measures included were maternal or pregnancy complications organised  
51  
52 into three groups related to when they occur during the pregnancy;  
53

- 54 • Conditions affecting pregnancy: gestational diabetes, gestational hypertension  
55 and pre-eclampsia (high blood pressure and protein in urine).  
56  
57  
58  
59  
60

- Conditions affecting delivery: placenta praevia (when a baby's placenta partially or totally covers the mother's cervix), placental abruption (when the placenta separates early from the uterus before childbirth), pre-term delivery (defined as less than 37 weeks of gestation), post-term delivery (more than 42 weeks of gestation), small for gestational age (SGA), and large for gestational age (LGA). SGA were infants with birthweight of  $\leq 10^{\text{th}}$  percentile for gestational age according to UK1990 growth reference curve (14,15), and those with LGA were infants with birth weight  $\geq 90^{\text{th}}$  percentile.
- Delivery: induction of labour, caesarean delivery (includes elective and emergency caesarean sections) and low Apgar score (less than "7" at 5 minutes).

### Covariates

Maternal age at delivery, smoking during pregnancy and Carstairs 2001 quintiles for socio-economic status in Scotland, based on the postcode of the mother's residence at birth, were considered as potentially confounding variables and were included as covariates in the adjusted analyses. Table 1 describes the covariates used in this study by maternal weight status among singleton (a pregnancy with one fetus, as opposed to twins or multiples) first-time pregnancies. The data in Table 1 show the numbers of women who had data on age, deprivation, maternal smoking and the three conditions being studied that occur during pregnancy.

Table 1. Maternal characteristics among normal weight, overweight and obese women<sup>+</sup> (singleton, first pregnancies)

|                         | Normal*    |      | Overweight* |      | Obese*     |      |
|-------------------------|------------|------|-------------|------|------------|------|
|                         | N = 71,538 |      | N = 36,188  |      | N = 25,173 |      |
|                         | N          | %    | N           | %    | N          | %    |
| <b>Maternal age (y)</b> |            |      |             |      |            |      |
| 20-24                   | 19,372     | 27.1 | 9,152       | 25.3 | 6,851      | 27.2 |
| 25-29                   | 23,871     | 33.4 | 11,895      | 32.9 | 8,280      | 32.9 |

|                                              |        |      |        |      |        |      |
|----------------------------------------------|--------|------|--------|------|--------|------|
| 30-34                                        | 20,488 | 28.6 | 10,304 | 28.5 | 6,777  | 26.9 |
| 35-39                                        | 7,807  | 10.9 | 4,837  | 13.4 | 3,265  | 13.0 |
| <b>Carstairs 2001 quintiles for Scotland</b> |        |      |        |      |        |      |
| Q1 (Least deprived)                          | 14,546 | 20.3 | 6,715  | 18.6 | 3,833  | 15.2 |
| Q2                                           | 13,574 | 19.0 | 6,733  | 18.6 | 4,578  | 18.2 |
| Q3                                           | 14,245 | 19.9 | 7,382  | 20.4 | 5,005  | 19.9 |
| Q4                                           | 14,930 | 20.9 | 7,777  | 21.5 | 5,909  | 23.5 |
| Q5 (Most deprived)                           | 14,243 | 19.9 | 7,581  | 21.0 | 5,848  | 23.2 |
| <b>Maternal smoking in pregnancy</b>         |        |      |        |      |        |      |
| No                                           | 61,116 | 85.4 | 31,119 | 86.0 | 21,130 | 83.9 |
| Yes                                          | 10,422 | 14.6 | 5,069  | 14.0 | 4,043  | 16.1 |

\*Maternal weight status at first antenatal visit

+Figures show women who had complete data on age, deprivation, maternal smoking and the conditions occurring during pregnancy

### **Data analyses**

Using Stata 14 (16), logistic regression models were fitted to calculate odds ratios (ORs). BMI groups with overweight and obesity were compared with the normal BMI group (the reference population). A confidence interval (CI) of 95% was produced for all ORs. The analyses of the outcomes proceeded in a systematic approach.

The outcomes were analysed in the three groups described above. As some of the outcomes were mutually exclusive (e.g. a baby cannot be both small and large for gestational age) those with the opposing outcome were excluded from the outcome being analysed. Each model was also adjusted for any of the outcomes that occurred earlier in the pregnancy. Table 2 provides information on the covariates adjusted for in each model.

Table 2. Full list of variables adjusted for in each of the models in Table 3

|                                       | Risk factors                                                                                                                      |                                                                                                                                       |                                                                                                                                                |          |
|---------------------------------------|-----------------------------------------------------------------------------------------------------------------------------------|---------------------------------------------------------------------------------------------------------------------------------------|------------------------------------------------------------------------------------------------------------------------------------------------|----------|
|                                       | Maternal circumstances                                                                                                            | Conditions affecting pregnancy                                                                                                        | Conditions affecting delivery                                                                                                                  | Delivery |
| <b>Conditions affecting pregnancy</b> |                                                                                                                                   |                                                                                                                                       |                                                                                                                                                |          |
| Gestational hypertension              | <ul style="list-style-type: none"> <li>• Age</li> <li>• Deprivation</li> <li>• Smoking status</li> <li>• Weight status</li> </ul> | <ul style="list-style-type: none"> <li>• Gestational diabetes</li> <li>• Pre-eclampsia</li> </ul>                                     | -                                                                                                                                              | -        |
| Gestational diabetes                  | <ul style="list-style-type: none"> <li>• Age</li> <li>• Deprivation</li> <li>• Smoking status</li> <li>• Weight status</li> </ul> | <ul style="list-style-type: none"> <li>• Gestational hypertension</li> <li>• Pre-eclampsia</li> </ul>                                 | -                                                                                                                                              | -        |
| Pre-eclampsia                         | <ul style="list-style-type: none"> <li>• Age</li> <li>• Deprivation</li> <li>• Smoking status</li> <li>• Weight status</li> </ul> | <ul style="list-style-type: none"> <li>• Gestational hypertension</li> <li>• Gestational diabetes</li> </ul>                          | -                                                                                                                                              | -        |
| <b>Conditions affecting delivery</b>  |                                                                                                                                   |                                                                                                                                       |                                                                                                                                                |          |
| Placenta praevia                      | <ul style="list-style-type: none"> <li>• Age</li> <li>• Deprivation</li> <li>• Smoking status</li> <li>• Weight status</li> </ul> | <ul style="list-style-type: none"> <li>• Gestational hypertension</li> <li>• Gestational diabetes</li> <li>• Pre-eclampsia</li> </ul> | <ul style="list-style-type: none"> <li>• Placental abruption</li> <li>• Size for gestational age</li> <li>• Full, pre- or post-term</li> </ul> | -        |
| Placental abruption                   | <ul style="list-style-type: none"> <li>• Age</li> <li>• Deprivation</li> <li>• Smoking status</li> <li>• Weight status</li> </ul> | <ul style="list-style-type: none"> <li>• Gestational hypertension</li> <li>• Gestational diabetes</li> <li>• Pre-eclampsia</li> </ul> | <ul style="list-style-type: none"> <li>• Placenta praevia</li> <li>• Size for gestational age</li> <li>• Full, pre- or post-term</li> </ul>    | -        |
| Small for gestational age             | <ul style="list-style-type: none"> <li>• Age</li> <li>• Deprivation</li> <li>• Smoking status</li> <li>• Weight status</li> </ul> | <ul style="list-style-type: none"> <li>• Gestational hypertension</li> <li>• Gestational diabetes</li> <li>• Pre-eclampsia</li> </ul> | <ul style="list-style-type: none"> <li>• Placental abruption</li> <li>• Placenta praevia</li> <li>• Full, pre- or post-term</li> </ul>         | -        |
| Large for gestational age             | <ul style="list-style-type: none"> <li>• Age</li> <li>• Deprivation</li> <li>• Smoking status</li> <li>• Weight status</li> </ul> | <ul style="list-style-type: none"> <li>• Gestational hypertension</li> <li>• Gestational diabetes</li> <li>• Pre-eclampsia</li> </ul> | <ul style="list-style-type: none"> <li>• Placental abruption</li> <li>• Placenta praevia</li> <li>• Full, pre- or post-term</li> </ul>         | -        |
| Pre-term                              | <ul style="list-style-type: none"> <li>• Age</li> <li>• Deprivation</li> <li>• Smoking status</li> </ul>                          | <ul style="list-style-type: none"> <li>• Gestational hypertension</li> <li>• Gestational diabetes</li> <li>• Pre-eclampsia</li> </ul> | <ul style="list-style-type: none"> <li>• Placental abruption</li> <li>• Placenta praevia</li> <li>• Size for gestational age</li> </ul>        | -        |

|                             |                                                                                                                                   |                                                                                                                                       |                                                                                                                                                                            |                                                                      |
|-----------------------------|-----------------------------------------------------------------------------------------------------------------------------------|---------------------------------------------------------------------------------------------------------------------------------------|----------------------------------------------------------------------------------------------------------------------------------------------------------------------------|----------------------------------------------------------------------|
|                             | <ul style="list-style-type: none"> <li>• Weight status</li> </ul>                                                                 |                                                                                                                                       |                                                                                                                                                                            |                                                                      |
| Post-term                   | <ul style="list-style-type: none"> <li>• Age</li> <li>• Deprivation</li> <li>• Smoking status</li> <li>• Weight status</li> </ul> | <ul style="list-style-type: none"> <li>• Gestational hypertension</li> <li>• Gestational diabetes</li> <li>• Pre-eclampsia</li> </ul> | <ul style="list-style-type: none"> <li>• Placental abruption</li> <li>• Placenta praevia</li> <li>• Size for gestational age</li> </ul>                                    | -                                                                    |
| <b>Delivery</b>             |                                                                                                                                   |                                                                                                                                       |                                                                                                                                                                            |                                                                      |
| Induction of labour         | <ul style="list-style-type: none"> <li>• Age</li> <li>• Deprivation</li> <li>• Smoking status</li> <li>• Weight status</li> </ul> | <ul style="list-style-type: none"> <li>• Gestational hypertension</li> <li>• Gestational diabetes</li> <li>• Pre-eclampsia</li> </ul> | <ul style="list-style-type: none"> <li>• Placental abruption</li> <li>• Placenta praevia</li> <li>• Size for gestational age</li> <li>• Full, pre- or post-term</li> </ul> | -                                                                    |
| Caesarean section           | <ul style="list-style-type: none"> <li>• Age</li> <li>• Deprivation</li> <li>• Smoking status</li> <li>• Weight status</li> </ul> | <ul style="list-style-type: none"> <li>• Gestational hypertension</li> <li>• Gestational diabetes</li> <li>• Pre-eclampsia</li> </ul> | <ul style="list-style-type: none"> <li>• Placental abruption</li> <li>• Placenta praevia</li> <li>• Size for gestational age</li> <li>• Full, pre- or post-term</li> </ul> | -                                                                    |
| Emergency caesarean section | <ul style="list-style-type: none"> <li>• Age</li> <li>• Deprivation</li> <li>• Smoking status</li> <li>• Weight status</li> </ul> | <ul style="list-style-type: none"> <li>• Gestational hypertension</li> <li>• Gestational diabetes</li> <li>• Pre-eclampsia</li> </ul> | <ul style="list-style-type: none"> <li>• Placental abruption</li> <li>• Placenta praevia</li> <li>• Size for gestational age</li> <li>• Full, pre- or post-term</li> </ul> | -                                                                    |
| Apgar score                 | <ul style="list-style-type: none"> <li>• Age</li> <li>• Deprivation</li> <li>• Smoking status</li> <li>• Weight status</li> </ul> | <ul style="list-style-type: none"> <li>• Gestational hypertension</li> <li>• Gestational diabetes</li> <li>• Pre-eclampsia</li> </ul> | <ul style="list-style-type: none"> <li>• Placental abruption</li> <li>• Placenta praevia</li> <li>• Size for gestational age</li> <li>• Full, pre- or post-term</li> </ul> | <ul style="list-style-type: none"> <li>• Mode of delivery</li> </ul> |



## Results

Within our study population 53.8% of pregnant women were categorised as normal weight, 27.2% as overweight and 18.9% as obese. The socio-demographic characteristics of the women in the three BMI categories are presented in Table 1. Maternal smoking prevalence was slightly higher among women with obesity than in women with normal weight or overweight. Among the women who were overweight, 21.0% were from the most deprived and 18.6% were from the least deprived group. However, the difference in social deprivation was more marked within women with obesity. Among this group, 23.2% were from the most deprived group whilst 15.2% were from the least deprived group.

Table 3 shows odds ratios (OR) for pregnancy and delivery complications, among women who were overweight or obese. The odds of gestational diabetes, pre-eclampsia and hypertension increased steadily with increasing BMI. Compared to the normal BMI group, the odds ratio of gestational diabetes was 2.14 (95% CI: 1.86-2.46) but among women who were obese the OR increased to 8.25 (95% CI: 7.33 – 9.30). Relative to women who were of normal weight, the adjusted OR of pre-eclampsia for women who were overweight was 1.46 (95% CI: 1.32-1.62), and 2.07 (95% CI: 1.87-2.29) for women who were obese. The OR of gestational hypertension, compared with women with normal weight, was 1.61 (95% CI: 1.49-1.74) for women with overweight, and 2.48 (95% CI: 2.30-2.68) for women with obesity.

Table 3. Pregnancy and delivery complications among normal, overweight and obese singleton women

|                                          | Total sample | Normal N (%)  | Cases (%)     | Overweight N (%) | Cases (%)     | Adjusted OR* (95% CI) | Obese N (%)   | Cases (%)    | Adjusted OR* (95% CI) |
|------------------------------------------|--------------|---------------|---------------|------------------|---------------|-----------------------|---------------|--------------|-----------------------|
| <b>Conditions affecting pregnancy</b>    |              |               |               |                  |               |                       |               |              |                       |
| Gestational hypertension                 | 132,899      | 71,538 (53.8) | 1,550 (2.2)   | 36,188 (27.2)    | 1,239 (3.4)   | 1.61 (1.49, 1.74)     | 25,173 (18.9) | 1,275 (5.1)  | 2.48 (2.30, 2.68)     |
| Gestational diabetes                     | 132,899      | 71,538 (53.8) | 377 (0.5)     | 36,188 (27.2)    | 418 (1.2)     | 2.14 (1.86, 2.46)     | 25,173 (18.9) | 1,082 (4.3)  | 8.25 (7.33, 9.30)     |
| Pre-eclampsia                            | 132,899      | 71,538 (53.8) | 906 (1.3)     | 36,188 (27.2)    | 664 (1.8)     | 1.46 (1.32, 1.62)     | 25,173 (18.9) | 640 (2.5)    | 2.07 (1.87, 2.29)     |
| <b>Conditions affecting delivery</b>     |              |               |               |                  |               |                       |               |              |                       |
| Placenta praevia <sup>1</sup>            | 132,212      | 71,172 (53.8) | 102 (0.1)     | 36,001 (27.2)    | 66 (0.2)      | 1.23 (0.90, 1.68)     | 25,039 (18.9) | 30 (0.1)     | 0.81 (0.54, 1.22)     |
| Placental abruption <sup>1</sup>         | 132,212      | 71,172 (53.8) | 133 (0.2)     | 36,001 (27.2)    | 55 (0.2)      | 0.81 (0.59, 1.11)     | 25,039 (18.9) | 38 (0.2)     | 0.76 (0.53, 1.10)     |
| Small for gestational age <sup>1,2</sup> | 94,906       | 53,320 (56.2) | 6,664 (12.5)  | 25,122 (26.5)    | 2,645 (10.5)  | 0.81 (0.78, 0.85)     | 16,464 (17.4) | 1,726 (10.5) | 0.79 (0.74, 0.83)     |
| Large for gestational age <sup>1,2</sup> | 121,177      | 64,508 (53.2) | 17,852 (27.7) | 33,356 (27.5)    | 10,879 (32.6) | 1.27 (1.23, 1.30)     | 23,313 (19.2) | 8,575 (36.8) | 1.53 (1.48, 1.58)     |
| Pre-term <sup>1,2</sup>                  | 132,212      | 71,172 (53.8) | 4,295 (6.0)   | 36,001 (27.2)    | 2,231 (6.2)   | 1.02 (0.96, 1.07)     | 25,039 (18.9) | 1,725 (6.9)  | 1.11 (1.05, 1.18)     |
| Post-term <sup>1,2,3</sup>               | 78,074       | 43,486 (55.7) | 31 (0.1)      | 20,973 (26.9)    | 24 (0.1)      | 1.57 (0.93, 2.68)     | 13,615 (17.4) | 14 (0.1)     | 1.47 (0.78, 2.77)     |
| <b>Delivery</b>                          |              |               |               |                  |               |                       |               |              |                       |
| Induction of labour <sup>2</sup>         | 92,967       | 53,617 (57.7) | 13,417 (25.0) | 24,342 (26.2)    | 7,420 (30.5)  | 1.28 (1.23, 1.33)     | 15,008 (16.1) | 5,712 (38.1) | 1.69 (1.62, 1.76)     |
| Caesarean section <sup>2</sup>           | 90,183       | 51,798 (57.4) | 11,598 (22.4) | 23,827 (26.4)    | 6,905 (29.0)  | 1.34 (1.29, 1.39)     | 14,558 (16.1) | 5,262 (36.2) | 1.80 (1.73, 1.88)     |
| Emergency caesarean section <sup>2</sup> | 80,938       | 45,715 (56.5) | 5,515 (12.1)  | 21,397 (26.4)    | 4,475 (20.9)  | 1.82 (1.74, 1.91)     | 13,826 (17.1) | 4,530 (32.8) | 3.14 (3.00, 3.29)     |
| Apgar score                              | 129,773      | 70,012 (54.0) | 12,583 (18.0) | 35,307 (27.2)    | 6,125 (17.4)  | 0.95 (0.92, 0.99)     | 24,454 (18.8) | 4,342 (17.8) | 0.96 (0.93, 1.00)     |

OR = Odds Ratio; CI = Confidence Interval

\*Adjusted for maternal age, deprivation, smoking in pregnancy and the pre- or co-existing conditions (see supplemental file 2)

<sup>1</sup>70 post-term births were excluded from these models as none of them experienced the outcome being estimated

<sup>2</sup>These total sample sizes differ as the outcome being estimated is mutually exclusive from one or more of the other outcomes within that group. For example, any baby being delivered pre-term cannot also have been delivered post-term and therefore these two models include the same 'controls' those delivered at term but difference 'cases' pre-term or post-term.

<sup>3</sup>No participants in the study delivering post-term had placenta praevia, placental abruption or had small or large for gestational age babies; therefore 45,957 participants were dropped from this analyses

1  
2  
3  
4  
5  
6 Regarding conditions affecting delivery, the odds ratio of placenta praevia was not  
7 statistically significant different for both women who were overweight (OR 1.23,  
8 95%CI: 0.90-1.68) or obese (OR 0.81, 95%CI: 0.54-1.22), compared with women  
9 with normal weight. The odds ratio of experiencing placental abruption was also not  
10 statistically significantly different across the different BMI categories.  
11  
12  
13  
14  
15  
16  
17

18 In contrast with the normal BMI group, births to women who were overweight and  
19 obese were associated with decreased odds of small-for-gestational age ORs 0.81  
20 (95% CI: 0.78-0.85) and 0.79 (95% CI: 0.74-0.83) respectively. However, the odds  
21 of large-for-gestational age newborns increased among women with overweight, OR  
22 of 1.27 (95%CI: 1.23-1.30) and women with obesity, OR 1.53 (95%CI: 1.48-1.58),  
23 compared with women of normal weight. Regarding the odds ratios for the pre-term  
24 and post-term outcomes, only the pre-term outcome for the obese group was  
25 statistically significant and the others were not significant: compared to the normal  
26 BMI group, the adjusted odds ratio of pre-term delivery was 1.02 (95% CI: 0.96-  
27 1.07), however among women who were obese the odds ratio was 1.11 (95% CI:  
28 1.05-1.18). Relative to women who were of normal weight, the adjusted OR of post-  
29 term for women who were overweight was 1.57 (95% CI: 0.93-2.68) and 1.47 (95%  
30 CI: 0.78-2.77) for women who were obese.  
31  
32  
33  
34  
35  
36  
37  
38  
39  
40  
41  
42  
43  
44  
45  
46  
47  
48  
49

50 The odds of induction of labour and caesarean section, either elective or emergency,  
51 increased with increasing BMI. Regarding induction of labour, the odds ratios were  
52 statistically significant for women with overweight (OR 1.28, 95%CI: 1.23-1.33) and  
53 those with obesity (OR 1.69, 95%CI: 1.62-1.76) compared with women with normal  
54 weight. Women who were overweight had odds ratios of 1.34 (95% CI: 1.29-1.39) for  
55  
56  
57  
58  
59  
60

1  
2  
3 having an elective Caesarean section and higher odds ratios (1.82, 95% CI: 1.74-  
4 1.91) for undergoing emergency Caesarean section, compared with women of  
5 normal weight. The corresponding odds ratios for women with obesity were 1.80  
6 (95% CI: 1.73-1.88) and 3.14 (95% CI: 3.00-3.29). Being overweight or obese was  
7 associated with reduced odds of low Apgar score. This was barely statistically  
8 significant for women who were overweight (OR 0.95, 95% CI: 0.92-0.99) or obese  
9 (OR 0.96, 95% CI: 0.93-1.00).  
10  
11  
12  
13  
14  
15  
16  
17  
18  
19  
20  
21  
22  
23  
24  
25

## 26 Discussion

27  
28 In this large, retrospective cohort study, we found that overweight or obesity during  
29 pregnancy was associated with increased odds of several adverse pregnancy and  
30 delivery complications. Aside from obesity, we also examined overweight because in  
31 most populations, a greater number of women are overweight rather than obese, so  
32 it is important to also understand the impact of overweight on pregnancy and  
33 neonatal outcomes.  
34  
35  
36  
37  
38  
39  
40  
41  
42  
43

44 In terms of the associations between high maternal BMI and conditions that occur  
45 *during* pregnancy, we found that the odds of all the conditions considered  
46 (gestational hypertension, gestational diabetes and pre-eclampsia) increased  
47 steadily with increasing BMI, which is in line with similar studies (2,10,17). A study  
48 compared women of normal weight to women who were morbidly obese (BMI  
49 greater than 40), and also found that there was an increased odds of pre-eclampsia  
50 (OR 4.82; 95% CI: 4.04-5.74) (10). Our study also found that, aside from heightened  
51  
52  
53  
54  
55  
56  
57  
58  
59  
60

1  
2  
3 pre-eclampsia odds for women with obesity, being overweight was also significantly  
4 associated with this outcome, albeit to a lesser degree. A meta-analysis of the  
5  
6 association between maternal BMI and the risk of pre-eclampsia showed that the risk  
7  
8 doubled with each 5-7 kg/m<sup>2</sup> increase in pre-pregnancy BMI (18). It is evident that  
9  
10 the risk of pre-eclampsia increases with the degree of weight gain; therefore  
11  
12 preventative strategies should be focussed on getting women, especially those  
13  
14 already overweight, to reduce weight prior to conception. Weight loss in pregnancy  
15  
16 requires careful management in order to avoid unintended consequences (19).  
17  
18 Nevertheless, women often engage with health professionals during pregnancy;  
19  
20 therefore dietary and lifestyle interventions such as physical activity, which have  
21  
22 been shown by reviews and meta-analyses (19,20) to reduce gestational weight gain  
23  
24 and improve outcomes for both mother and baby, could be provided to them.  
25  
26  
27  
28  
29  
30  
31  
32

33 Generally, rates of Caesarean delivery have increased significantly across many  
34  
35 developed countries in recent years (21). Our study found that women with  
36  
37 overweight and obesity showed increased odds of Caesarean delivery (both elective  
38  
39 and emergency) compared to women with normal weight, but we note that the  
40  
41 overall frequency of Caesarean delivery across our obstetric population seems quite  
42  
43 high, compared with a previous Swedish study (10). We also found that women with  
44  
45 overweight and obesity are at increased odds of labour induction. A very recent  
46  
47 systematic review found that women with obesity are more likely than women with a  
48  
49 normal weight to end labour induction with Caesarean delivery (22). Possible  
50  
51 reasons could be that Caesarean delivery is probably less risky now, due to  
52  
53 advances in medical science, which facilitate accurate monitoring of the progress of  
54  
55 labour and the detection of fetal intra-partum conditions (23). It is also possible that  
56  
57  
58  
59  
60

1  
2  
3 health professionals in Scotland are intervening earlier with regards to problems in  
4 labour among women with overweight or obesity, in order to reduce fetal distress,  
5 and its worst outcomes. Nevertheless, this pattern of very high Caesarean rates is  
6 concerning for Scotland, which has invested in programmes aimed at promoting  
7 natural birth, such as Keeping Childbirth Natural and Dynamic (KCND). The KCND is  
8 a maternity care programme introduced by the Scottish Government with the aim of  
9 maximising opportunities for women to have as natural a birth experience as  
10 possible, reduce unnecessary interventions in low-risk pregnancy and childbirth, and  
11 to provide women-centred care (24,25,26). The early intervention in pregnancy may  
12 also explain the reduced odds of low Apgar score for infants born to women with  
13 overweight and obesity. It is likely that these women may receive increased  
14 monitoring, which means issues can be identified and managed earlier, to reduce  
15 any fetal distress in labour.  
16  
17  
18  
19  
20  
21  
22  
23  
24  
25  
26  
27  
28  
29  
30  
31  
32  
33  
34

35 Adiposity has also been found to increase odds of large-for-gestational age and  
36 macrosomia (27). In this study, we found that births to women with overweight and  
37 obesity were associated with increased odds of large-for-gestational age infants,  
38 compared with women of normal weight. Excess weight in pregnancy may shift the  
39 entire birth weight distribution upwards, perhaps through hormonal mechanisms that  
40 operate at lower levels, rather than in full-blown cases of macrosomia in infants of  
41 diabetic mothers. It is therefore unsurprising that high maternal BMI significantly  
42 decreased the odds of small-for-gestational age among our study population.  
43  
44  
45  
46  
47  
48  
49  
50  
51  
52  
53  
54

55  
56 We found that pregnant women with obesity were at significantly increased odds of  
57 pre-term delivery, however the odds ratio was high but not statistically significant for  
58  
59  
60

1  
2  
3 women with overweight. A systematic review examining the effect of maternal  
4  
5 overweight and obesity on pre-term delivery showed that both women with  
6  
7 overweight and obesity were at significantly higher risk of pre-term delivery (28). It  
8  
9 has been shown that pre-eclampsia leads to pre-term delivery, especially in elective  
10  
11 pre-term delivery (29). It is not clear why the odds ratio of pre-term delivery for  
12  
13 women with overweight in our study population was not statistically significant.  
14  
15 However, it is likely that the higher odds of pre-eclampsia in women with obesity,  
16  
17 compared with women with overweight, could explain this finding. Regarding post-  
18  
19 term delivery, there were no statistically significant odds ratios among women with  
20  
21 both overweight and obesity. As discussed previously, it is likely that early  
22  
23 intervention in pregnancy among our study population reduced the odds of the  
24  
25 occurrence of post-term delivery.  
26  
27  
28  
29  
30  
31  
32

33 We examined the association between high maternal BMI and placental abruption  
34  
35 and placenta praevia, but found no statistically significant association between each  
36  
37 of these two outcomes and overweight or obesity. This finding is congruent with a  
38  
39 previous study (10). It appears that the relationships between maternal overweight  
40  
41 and obesity, and both placental abruption and placenta praevia, may require further  
42  
43 attention in future research.  
44  
45  
46  
47  
48

### 49 ***Strengths and limitations***

50  
51 This study comprised a large, retrospectively accessed but cohort-structured,  
52  
53 national database, covering several maternal and neonatal outcomes. The analyses  
54  
55 used a population-wide data with adjustment for some confounders to estimate  
56  
57 impact of high maternal-weight status on each outcome. We restricted the analyses  
58  
59  
60

1  
2  
3 to only single births and first pregnancies to ensure that the births in the sample were  
4 relatively independent. The dataset we were provided with combined underweight  
5 and normal weight women as normal BMI group. Using this as the reference group  
6 might have strengthened the association between high maternal BMI and the  
7 pregnancy and neonatal outcomes considered. However, only a very small number  
8 of women are underweight during pregnancy in Scotland in recent years (2.8% in  
9 2018/19) (30). Also, some studies differentiate between different obesity categories,  
10 but in this study the dataset we accessed did not differentiate these categories, and  
11 it was not possible to do this retrospectively; therefore all women with BMI of 30 or  
12 more were considered as having obesity. It is likely that differentiating morbid  
13 obesity, or obesity class II and III from women with obesity, would have generated  
14 additional insight, in the form of a full “dose response relationship”. The  
15 completeness of the recording of BMI increased during the study period (2008 to  
16 2015) from 69% to 98%. Using data from the earlier years, when the BMI was  
17 missing more often, might have biased the study sample if BMI was not missing at  
18 random. In addition, mothers aged below 20 years and over 40 years were excluded  
19 from analyses due to the low numbers of cases in these age groups with obesity and  
20 experiencing adverse outcomes. The study controlled for a limited set of  
21 confounders, due to data availability; inclusion of other relevant confounders could  
22 have strengthened the analyses. For example, variables such as ethnicity, previous  
23 caesarean sections, and time of birth were not available in the dataset, which we  
24 accessed. Also, we could not analyse neonatal outcomes such as stillbirth, neonatal  
25 death and congenital anomaly because these outcomes are not completely  
26 ascertained in the dataset we used.  
27  
28  
29  
30  
31  
32  
33  
34  
35  
36  
37  
38  
39  
40  
41  
42  
43  
44  
45  
46  
47  
48  
49  
50  
51  
52  
53  
54  
55  
56  
57  
58  
59  
60



## Conclusion

This study has shown that women who are overweight, and especially those who are obese in Scotland are at greater odds of several pregnancy and delivery complications including gestational hypertension, gestational diabetes, pre-eclampsia, labour induction and Caesarean delivery. The odds ratios of these conditions increased with increasing BMI. Health professionals should be empowered and trained to deliver promising dietary and lifestyle interventions to women at risk of overweight and obesity prior to conception, and control excessive weight gain in pregnancy.

## References

1. Rooney BL, Schauburger CW. Excess pregnancy weight gain and long-term obesity: one decade later. *Obstet Gynecol* 2002; **100(2)**: 245-252.
2. Kumari P, Gupta M, Kahlon P, Malviya S. Association between high maternal body mass index and fetomaternal Outcome. *J Obes Metab Res* 2014; **1**: 143-148.
3. Poobalan AS, Aucott LS, Gurung T, Smith WC, Bhattacharya S. Obesity as an independent risk factor for elective and emergency caesarean delivery in nulliparous women – systematic review and meta-analysis of cohort studies. *Obesity Reviews* 2009 10: 28-35. doi:[10.1111/j.1467-789X.2008.00537.x](https://doi.org/10.1111/j.1467-789X.2008.00537.x)
4. Rahman MM, Abe SK, Kanda M, Narita S, Rahman MS, Bilano V, Ota E, Gilmour S, Shibuya K. Maternal body mass index and the risk of birth and maternal health outcomes in low- and middle-income countries: a systematic review and meta-analysis. *Obesity Reviews* 2015; **16**: 758–770.

- 1  
2  
3 5. Godfrey KM, Reynolds RM, Prescott SL, Nyirenda M, Jaddoe VVW, Eriksson  
4  
5 JG, Broekmann BFP. Influence of maternal obesity on the long-term health of  
6  
7 offspring. *Lancet Diabetes Endocrinol* 2017; **5**: 53–64.
- 8  
9  
10 6. Morgan KL, Rahman MA, Hill RA, et al. Obesity in pregnancy: infant health  
11  
12 service utilisation and costs on the NHS. *BMJ Open* 2015;5:e008357.  
13  
14 doi:10.1136/bmjopen-2015- 008357.
- 15  
16  
17 7. Doi L, Williams AJ, Frank J. How has child growth around adiposity rebound  
18  
19 altered in Scotland since 1990 and what are the risk factors for weight gain  
20  
21 using the Growing Up in Scotland birth cohort 1? *BMC Public Health* 2016;  
22  
23 **16**: 1081.
- 24  
25  
26 8. Denison FC, Norwood P, Bhattacharya S, Duffy A, Mahmood T, Morris C,  
27  
28 Raja EA, Norman JE, Lee AJ, Scotland G. Association between maternal  
29  
30 body mass index during pregnancy, short-term morbidity, and increased  
31  
32 health service costs: a population-based study. *BJOG* 2014; **121**:72–82.
- 33  
34  
35 9. Smith GCS, Shah I, Pell JP, Crossley JA, Dobbie R. Maternal Obesity in Early  
36  
37 Pregnancy and Risk of Spontaneous and Elective Preterm Deliveries: A  
38  
39 Retrospective Cohort Study, *American Journal of Public Health* 2007; **97**(1):  
40  
41 157-162.
- 42  
43  
44 10. Cedergren MI. Maternal morbid obesity and the risk of adverse pregnancy  
45  
46 outcome. *Obstetricians and Gynecologists* 2004; **103**: 219-224.
- 47  
48  
49 11. Information Service Division (2019). Data Dictionary.  
50  
51 <https://www.ndc.scot.nhs.uk/Dictionary-A-Z/>
- 52  
53  
54 12. Information Service Division (2018). Scottish birth record.  
55  
56 [http://www.ndc.scot.nhs.uk/Data-Dictionary/SMR-Datasets/Scottish-Birth-  
57  
58  
59  
60 Record/](http://www.ndc.scot.nhs.uk/Data-Dictionary/SMR-Datasets/Scottish-Birth-Record/)

- 1  
2  
3 13. Scottish Government (2019) NHS Scotland performance against LDP  
4  
5 standard. [https://www.gov.scot/publications/nhsscotland-performance-against-](https://www.gov.scot/publications/nhsscotland-performance-against-ldp-standards/pages/early-access-to-antenatal-services/)  
6  
7 [ldp-standards/pages/early-access-to-antenatal-services/](https://www.gov.scot/publications/nhsscotland-performance-against-ldp-standards/pages/early-access-to-antenatal-services/)  
8  
9  
10  
11 14. Cole TJ, Freeman JV, Preece MA. Body mass index reference curves for the  
12  
13 UK, 1990. *Arch Dis Child* 1995; **73(1)**: 25–29.  
14  
15 15. Freeman JV, Cole TJ, Chinn S, Jones PRM, White EM, Preece MA. Cross-  
16  
17 sectional stature and weight reference curves for the UK 1990. *Arch Dis Child*  
18  
19 1995; **73(1)**:17–24.  
20  
21  
22 16. StataCorp. Stata statistical software: release 14. College Station: StataCorp  
23  
24 LP; 2015.  
25  
26 17. Scott-Pillai R, Spence D, Cardwell C, Hunter A, Holmes V. The impact of body  
27  
28 mass index on maternal and neonatal outcomes: a retrospective study in a  
29  
30 UK obstetric population, 2004–2011. *BJOG* 2013; **120**: 932–939.  
31  
32  
33 18. O'Brien TE, Ray JG, Chan WS. Maternal body mass index and the risk of  
34  
35 preeclampsia: A systematic overview. *Epidemiology* 2003; **14**: 368-374.  
36  
37  
38 19. Shieh C, Cullen DL, Pike C, Pressler SJ. Intervention strategies for preventing  
39  
40 excessive gestational weight gain: systematic review and meta-analysis.  
41  
42 *Obesity Reviews* 2018; doi: 10.1111/obr.12691.  
43  
44  
45 20. Thangaratinam S, Rogozinska E, Jolly K, Glinkowski S, Roseboom T,  
46  
47 Tomlinson JW, Kunz R, Mol BW, Coomarasamy A, Khan KS. Effects of  
48  
49 interventions in pregnancy on maternal weight and obstetric outcomes: Meta-  
50  
51 analysis of randomised evidence. *BMJ*. 2012; **344**: e2088.  
52  
53  
54 21. Althabe F, Sosa C, Belizán JM, Gibbons L, Jacquerioz F, Bergel E. Cesarean  
55  
56 section rates and maternal and neonatal mortality in low-, medium-, and high-  
57  
58 income countries: an ecological study. *Birth* 2006; **33(4)**: 270-277.  
59  
60

- 1  
2  
3 22. Ellis JA, Brown CM, Barger B, Carlson NS. (2019), Influence of Maternal  
4 Obesity on Labor Induction: A Systematic Review and Meta-Analysis. *Journal*  
5 *of Midwifery & Women's Health*, 2019; **64**: 55-67. doi:[10.1111/jmwh.12935](https://doi.org/10.1111/jmwh.12935)  
6  
7  
8  
9  
10 23. Rezaie M, Shahoe R, Shahghebi S. The effect of maternal body mass index  
11 on the delivery route in nulliparous women. *Journal of Public Health and*  
12 *Epidemiology* 2013; **5(8)**: 346-350.  
13  
14  
15  
16  
17 24. Health Improvement Scotland (2009). Pathways for maternity care.  
18 <http://www.healthcareimprovementscotland.org/default.aspx?page=12536>  
19  
20  
21 25. Abhyankar P, Cheyne H, Maxwell M, McCourt C. A realist evaluation of a  
22 normal birth programme. *Evidence Based Midwifery* 2013;  
23 [https://www.rcm.org.uk/learning-and-career/learning-and-research/ebm-](https://www.rcm.org.uk/learning-and-career/learning-and-research/ebm-articles/a-realist-evaluation-of-a-normal-birth)  
24 [articles/a-realist-evaluation-of-a-normal-birth](https://www.rcm.org.uk/learning-and-career/learning-and-research/ebm-articles/a-realist-evaluation-of-a-normal-birth).  
25  
26  
27  
28  
29  
30 26. Cheyne H, Abhyankar P, McCourt C. Empowering change: realist evaluation  
31 of a Scottish Government programme to support normal birth. *Midwifery* 2013;  
32 **29**: 1110–1121.  
33  
34  
35  
36  
37 27. Surkan PJ, Hsieh CC, Johansson AL, Dickman PW, Cnattingius S. Reasons  
38 for increasing trends in large for gestational age births. *Obstet Gynecol* 2004;  
39 **104**:720–6. doi:[10.1097/01.AOG.0000141442.59573.cd](https://doi.org/10.1097/01.AOG.0000141442.59573.cd)  
40  
41  
42  
43  
44  
45 28. McDonald SD, Han Z, Mulla S, Beyene J. Overweight and obesity in mothers  
46 and risk of preterm birth and low birth weight infants: systematic review and  
47 meta-analyses *BMJ* 2010; 341 :c3428.  
48  
49  
50  
51 29. Hendler I, Goldenberg RL, Mercer BM, et al. The Preterm Prediction Study:  
52 association between maternal body mass index and spontaneous and  
53 indicated pre-term birth. *Am J Obstet Gynecol*. 2005; **192**:882–886.  
54  
55  
56  
57  
58  
59  
60

1  
2  
3 30. ISD Scotland, Births In Scottish Hospitals - Year ending 31<sup>st</sup> March 2019  
4  
5

6 <https://www.isdscotland.org/Health-Topics/Maternity-and->  
7

8 [Births/Publications/data-tables2017.asp?id=2553#2553](https://www.isdscotland.org/Health-Topics/Maternity-and-Births/Publications/data-tables2017.asp?id=2553#2553) Published 26<sup>th</sup> Nov  
9

10 2019.  
11  
12  
13

## 14 **Funding**

15  
16 This work was funded by the SCPHRP core grant from the Medical Research  
17 Council (Grant Number MR/K023209/1) and the Chief Scientist Office of Scotland.  
18

19 AJW is supported by the European Centre for Environment and Human Health,  
20  
21 University of Exeter. LM is supported by the Farr Institute @ Scotland, which is  
22

23 supported by a 10-funder consortium: Arthritis Research UK, the British Heart  
24  
25 Foundation, Cancer Research UK, the Economic and Social Research Council, the  
26

27 Engineering and Physical Sciences Research Council, the Medical Research  
28  
29 Council, the National Institute of Health Research, the National Institute for Social  
30

31 Care and Health Research (Welsh Assembly Government), the Chief Scientist Office  
32  
33 (Scottish Government Health Directorates), (MRC Grant No: MR/K007017/1). The  
34

35 funders played no role in the conceptualisation or realisation of the research and no  
36  
37 role in the decision to submit it for publication.  
38  
39  
40  
41  
42  
43  
44  
45  
46  
47  
48  
49  
50  
51  
52  
53  
54  
55  
56  
57  
58  
59  
60

## 55 **Competing interest**

56 The authors declare that they have no competing interests.  
57  
58  
59  
60

## 55 **Data sharing**

1  
2  
3 Data used was categorised as confidential data release by the Electronic Data  
4  
5 Research and Innovation Service of the Information Services Division, NHS National  
6  
7 Services Scotland.  
8  
9

### 10 11 12 **Acknowledgements** 13

14 The authors are grateful to the Electronic Data Research and Innovation Service of  
15  
16 the Information Services Division, NHS National Services Scotland for providing the  
17  
18 data used in this paper.  
19  
20  
21  
22

### 23 24 **Authors' contributions** 25

26 LD, AJW and JF conceived the original idea for the study and obtained the data.  
27  
28 AJW led the statistical analyses with support from LD, LM and JF. LD wrote the first  
29  
30 draft of the paper and all authors revised successive drafts and approved the final  
31  
32 manuscript.  
33  
34  
35  
36  
37  
38  
39  
40  
41  
42  
43  
44  
45  
46  
47  
48  
49  
50  
51  
52  
53  
54  
55  
56  
57  
58  
59  
60

## Supplementary file 1: Description of data fields used in the study

| Variable Name       | Database Source      | Variable Description/Values                                                                                                                                                                                                                       | Notes                                                                                                                                                                                                                       |
|---------------------|----------------------|---------------------------------------------------------------------------------------------------------------------------------------------------------------------------------------------------------------------------------------------------|-----------------------------------------------------------------------------------------------------------------------------------------------------------------------------------------------------------------------------|
| Mother_ID           | N/A - study specific | Unique mother identifier                                                                                                                                                                                                                          | 1516-0613/' followed by an anonymous identifier                                                                                                                                                                             |
| Baby_ID             | N/A - study specific | Unique baby identifier                                                                                                                                                                                                                            | Mother_ID followed by delivery sequence number followed by a baby sequence number. The baby sequence number for multiple babies from same delivery not necessarily in correct order due to missing CHI numbers.             |
| Delivery_Seq_No     | N/A - study specific | Delivery sequence number of mother                                                                                                                                                                                                                |                                                                                                                                                                                                                             |
| Gest_Diabetes       | SMR02                | <b>1:</b> Yes, Gestational diabetes (diagnosed during this pregnancy)<br><b>0:</b> Yes, Pre-existing diabetes (diagnosed before pregnancy) & No (no diabetes during this pregnancy)<br><b>Missing:</b> Yes, Time of diagnosis unknown & Not Known | <a href="http://www.ndc.scot.nhs.uk/Dictionary-A-Z/Definitions/index.asp?Search=D&amp;ID=214&amp;Title=Diabetes">http://www.ndc.scot.nhs.uk/Dictionary-A-Z/Definitions/index.asp?Search=D&amp;ID=214&amp;Title=Diabetes</a> |
| Gest_Hypertension   | SMR02/SMR01          | <b>1:</b> ICD 10 code O13.X<br><b>0:</b> All other codes                                                                                                                                                                                          | Flagged codes cover gestational hypertension                                                                                                                                                                                |
| Pre_Eclampsia       | SMR02/SMR01          | <b>1:</b> ICD 10 code O14._<br><b>0:</b> All other codes                                                                                                                                                                                          | Flagged codes cover pre-eclampsia                                                                                                                                                                                           |
| Placental_Abruption | SMR02/SMR01          | <b>1:</b> ICD 10 code O45._<br><b>0:</b> All other codes                                                                                                                                                                                          | Flagged codes cover placental abruption                                                                                                                                                                                     |
| Placental_Praevia   | SMR02/SMR01          | <b>1:</b> ICD 10 code O44._<br><b>0:</b> All other codes                                                                                                                                                                                          | Flagged codes cover placenta praevia                                                                                                                                                                                        |

|                        |             |                                                                                                                                  |                                                                                                                                                                                                                                                                             |
|------------------------|-------------|----------------------------------------------------------------------------------------------------------------------------------|-----------------------------------------------------------------------------------------------------------------------------------------------------------------------------------------------------------------------------------------------------------------------------|
| Postpartum_Haemorrhage | SMR02/SMR01 | <b>1:</b> ICD 10 code O72._<br><b>0:</b> All other codes                                                                         | Flagged codes cover postpartum haemorrhage                                                                                                                                                                                                                                  |
| Caesarean_Delivery     | SMR02       | <b>1:</b> Elective (planned) caesarean section & Emergency and unspecified caesarean section<br><b>0:</b> All other codes        | <a href="http://www.ndc.scot.nhs.uk/Dictionary-A-Z/Definitions/index.asp?Search=M&amp;ID=322&amp;Title=Mode of Delivery - Babies 1 to 3">http://www.ndc.scot.nhs.uk/Dictionary-A-Z/Definitions/index.asp?Search=M&amp;ID=322&amp;Title=Mode of Delivery - Babies 1 to 3</a> |
| Labour_Induction       | SMR02       | <b>1:</b> 1-8 - Induction of labour codes<br><b>0:</b> 0, None<br><b>Missing:</b> 9, Not known                                   | <a href="http://www.ndc.scot.nhs.uk/Dictionary-A-Z/Definitions/index.asp?Search=I&amp;ID=295&amp;Title=Induction of Labour">http://www.ndc.scot.nhs.uk/Dictionary-A-Z/Definitions/index.asp?Search=I&amp;ID=295&amp;Title=Induction of Labour</a>                           |
| SGA                    | SMR02       | <b>1:</b> Birthweight ≤10th percentile<br><b>0:</b> Birthweight >10th percentile                                                 | Small for gestational age flag                                                                                                                                                                                                                                              |
| LGA                    | SMR02       | <b>1:</b> Birthweight ≥90th percentile<br><b>0:</b> Birthweight <90th percentile                                                 | Large for gestational age flag                                                                                                                                                                                                                                              |
| Preterm_Delivery       | SMR02       | <b>1:</b> Estimated gestation < 37 weeks<br><b>0:</b> Estimated gestation ≥ 37 weeks and ≤ 42 weeks<br><b>Missing:</b> otherwise | <a href="http://www.ndc.scot.nhs.uk/Dictionary-A-Z/Definitions/index.asp?Search=E&amp;ID=242&amp;Title=Estimated Gestation">http://www.ndc.scot.nhs.uk/Dictionary-A-Z/Definitions/index.asp?Search=E&amp;ID=242&amp;Title=Estimated Gestation</a>                           |
| Postterm_Delivery      | SMR02       | <b>1:</b> Estimated gestation > 42 weeks<br><b>0:</b> Estimated gestation ≥ 37 weeks and ≤ 42 weeks<br><b>Missing:</b> otherwise | <a href="http://www.ndc.scot.nhs.uk/Dictionary-A-Z/Definitions/index.asp?Search=E&amp;ID=242&amp;Title=Estimated Gestation">http://www.ndc.scot.nhs.uk/Dictionary-A-Z/Definitions/index.asp?Search=E&amp;ID=242&amp;Title=Estimated Gestation</a>                           |
| Apgar_Score            | SMR02       | <b>1:</b> Apgar score at 5 mins < 7<br><b>0:</b> Apgar score at 5 mins ≥ 7                                                       | <a href="http://www.ndc.scot.nhs.uk/Dictionary-A-Z/Definitions/index.asp?Search=A&amp;ID=88&amp;Title=Apgar Score - Babies 1 to 3">http://www.ndc.scot.nhs.uk/Dictionary-A-Z/Definitions/index.asp?Search=A&amp;ID=88&amp;Title=Apgar Score - Babies 1 to 3</a>             |
| Maternal_Obesity       | SMR02       | <b>1:</b> Obese status<br><b>0:</b> Overweight, Healthy or underweight status                                                    | Adults with BMI ≥ 30 classed as obese. BMI of girls aged 2 - 19 years old standardized using UK1990 growth reference values and z-score ≥ 6/3 (98th centile) classed as obese.                                                                                              |



|                             |            |                                                                                 |                                                                                                                                                                                                                                                                                   |
|-----------------------------|------------|---------------------------------------------------------------------------------|-----------------------------------------------------------------------------------------------------------------------------------------------------------------------------------------------------------------------------------------------------------------------------------|
| Maternal_Overweight_Obesity | SMR02      | <b>1:</b> Overweight or Obese status<br><b>0:</b> Healthy or underweight status | Adults with BMI $\geq 25$ classed as overweight or obese. BMI of girls aged 2 - 19 years old standardized using UK1990 growth reference values and z-score $\geq 4/3$ (91st centile) classed as overweight or obese.                                                              |
| Age                         | SMR02      | Age of mother at delivery (in years)                                            |                                                                                                                                                                                                                                                                                   |
| Parity                      | SMR02      | Total number of previous pregnancies                                            | <a href="http://www.ndc.scot.nhs.uk/Dictionary-A-Z/Definitions/index.asp?Search=P&amp;ID=409&amp;Title=Previous%20Pregnancies">http://www.ndc.scot.nhs.uk/Dictionary-A-Z/Definitions/index.asp?Search=P&amp;ID=409&amp;Title=Previous Pregnancies</a>                             |
| Deprivation                 | SMR02      | Carstairs 2001 quintiles for Scotland                                           | 1=least deprived; 5=most deprived                                                                                                                                                                                                                                                 |
| Smoking_Status              | SMR02      | <b>1:</b> Yes<br><b>0:</b> No<br><b>Missing:</b> Not known                      | <a href="http://www.ndc.scot.nhs.uk/Dictionary-A-Z/Definitions/index.asp?Search=S&amp;ID=456&amp;Title=Smoker%20During%20Pregnancy">http://www.ndc.scot.nhs.uk/Dictionary-A-Z/Definitions/index.asp?Search=S&amp;ID=456&amp;Title=Smoker During Pregnancy</a>                     |
| Multiple_births             | SMR02      | <b>1:</b> More than one birth this pregnancy<br><b>0:</b> Single birth          | <a href="http://www.ndc.scot.nhs.uk/Dictionary-A-Z/Definitions/index.asp?Search=N&amp;ID=349&amp;Title=Number%20of%20Births%20this%20Pregnancy">http://www.ndc.scot.nhs.uk/Dictionary-A-Z/Definitions/index.asp?Search=N&amp;ID=349&amp;Title=Number of Births this Pregnancy</a> |
| Multiple_births_in_NRS      | NRS Births | <b>1:</b> Multiple babies found for this mother's delivery in NRS Births        | Multiple babies recorded in NRS Births but only a single baby recorded in SMR02                                                                                                                                                                                                   |
| Previous_Caesarean_section  | SMR02      | <b>1:</b> More than zero<br><b>0:</b> Zero                                      | <a href="http://www.ndc.scot.nhs.uk/Dictionary-A-Z/Definitions/index.asp?Search=P&amp;ID=406&amp;Title=Previous%20Caesarean%20Sections">http://www.ndc.scot.nhs.uk/Dictionary-A-Z/Definitions/index.asp?Search=P&amp;ID=406&amp;Title=Previous Caesarean Sections</a>             |

Supplementary file 2. Study flow diagram

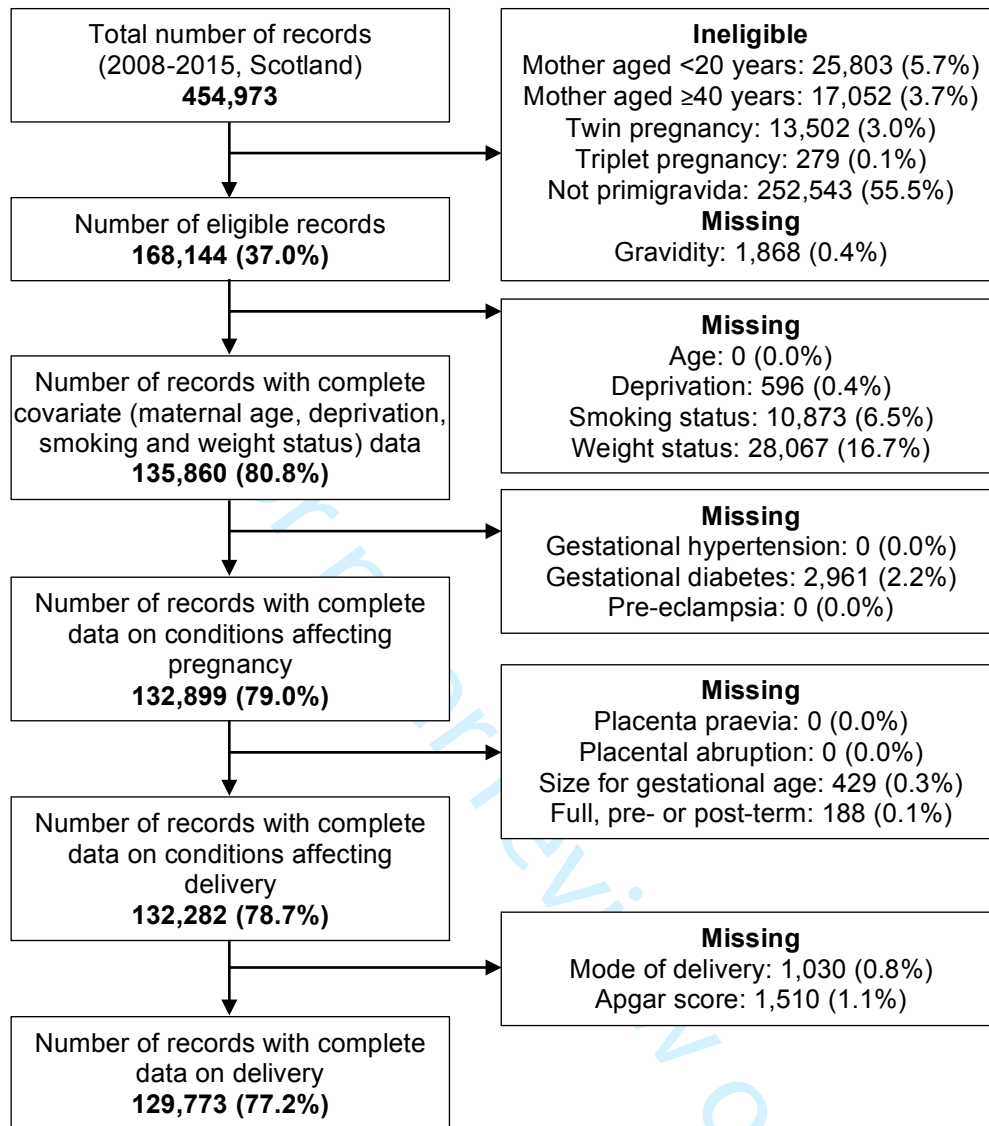

## STROBE (Strengthening The Reporting of OBServational Studies in Epidemiology) Checklist

A checklist of items that should be included in reports of observational studies. You must report the page number in your manuscript where you consider each of the items listed in this checklist. If you have not included this information, either revise your manuscript accordingly before submitting or note N/A.

**Note:** An Explanation and Elaboration article discusses each checklist item and gives methodological background and published examples of transparent reporting. The STROBE checklist is best used in conjunction with this article (freely available on the Web sites of PLoS Medicine at <http://www.plosmedicine.org/>, Annals of Internal Medicine at <http://www.annals.org/>, and Epidemiology at <http://www.epidem.com/>). Information on the STROBE Initiative is available at [www.strobe-statement.org](http://www.strobe-statement.org).

| Section and Item     | Item No. | Recommendation                                                                                                                                                                                                                                                                                                                                                                                                                                                                 | Reported on Page No. |
|----------------------|----------|--------------------------------------------------------------------------------------------------------------------------------------------------------------------------------------------------------------------------------------------------------------------------------------------------------------------------------------------------------------------------------------------------------------------------------------------------------------------------------|----------------------|
| Title and Abstract   | 1        | (a) Indicate the study's design with a commonly used term in the title or the abstract                                                                                                                                                                                                                                                                                                                                                                                         |                      |
|                      |          | (b) Provide in the abstract an informative and balanced summary of what was done and what was found                                                                                                                                                                                                                                                                                                                                                                            |                      |
| <b>Introduction</b>  |          |                                                                                                                                                                                                                                                                                                                                                                                                                                                                                |                      |
| Background/Rationale | 2        | Explain the scientific background and rationale for the investigation being reported                                                                                                                                                                                                                                                                                                                                                                                           |                      |
| Objectives           | 3        | State specific objectives, including any prespecified hypotheses                                                                                                                                                                                                                                                                                                                                                                                                               |                      |
| <b>Methods</b>       |          |                                                                                                                                                                                                                                                                                                                                                                                                                                                                                |                      |
| Study Design         | 4        | Present key elements of study design early in the paper                                                                                                                                                                                                                                                                                                                                                                                                                        |                      |
| Setting              | 5        | Describe the setting, locations, and relevant dates, including periods of recruitment, exposure, follow-up, and data collection                                                                                                                                                                                                                                                                                                                                                |                      |
| Participants         | 6        | (a) <i>Cohort study</i> —Give the eligibility criteria, and the sources and methods of selection of participants. Describe methods of follow-up<br><br><i>Case-control study</i> —Give the eligibility criteria, and the sources and methods of case ascertainment and control selection. Give the rationale for the choice of cases and controls<br><br><i>Cross-sectional study</i> —Give the eligibility criteria, and the sources and methods of selection of participants |                      |
|                      |          | (b) <i>Cohort study</i> —For matched studies, give matching criteria and number of exposed and unexposed<br><br><i>Case-control study</i> —For matched studies, give matching criteria and the number of controls per case                                                                                                                                                                                                                                                     |                      |
| Variables            | 7        | Clearly define all outcomes, exposures, predictors, potential confounders, and effect modifiers. Give diagnostic criteria, if applicable                                                                                                                                                                                                                                                                                                                                       |                      |

| Section and Item             | Item No. | Recommendation                                                                                                                                                                                                                                                                                            | Reported on Page No. |
|------------------------------|----------|-----------------------------------------------------------------------------------------------------------------------------------------------------------------------------------------------------------------------------------------------------------------------------------------------------------|----------------------|
| Data Sources/<br>Measurement | 8*       | For each variable of interest, give sources of data and details of methods of assessment (measurement). Describe comparability of assessment methods if there is more than one group                                                                                                                      |                      |
| Bias                         | 9        | Describe any efforts to address potential sources of bias                                                                                                                                                                                                                                                 |                      |
| Study Size                   | 10       | Explain how the study size was arrived at                                                                                                                                                                                                                                                                 |                      |
| Quantitative Variables       | 11       | Explain how quantitative variables were handled in the analyses. If applicable, describe which groupings were chosen and why                                                                                                                                                                              |                      |
| Statistical Methods          | 12       | (a) Describe all statistical methods, including those used to control for confounding                                                                                                                                                                                                                     |                      |
|                              |          | (b) Describe any methods used to examine subgroups and interactions                                                                                                                                                                                                                                       |                      |
|                              |          | (c) Explain how missing data were addressed                                                                                                                                                                                                                                                               |                      |
|                              |          | (d) <i>Cohort study</i> —If applicable, explain how loss to follow-up was addressed<br><i>Case-control study</i> —If applicable, explain how matching of cases and controls was addressed<br><i>Cross-sectional study</i> —If applicable, describe analytical methods taking account of sampling strategy |                      |
|                              |          | (e) Describe any sensitivity analyses                                                                                                                                                                                                                                                                     |                      |
| <b>Results</b>               |          |                                                                                                                                                                                                                                                                                                           |                      |
| Participants                 | 13*      | (a) Report numbers of individuals at each stage of study—eg numbers potentially eligible, examined for eligibility, confirmed eligible, included in the study, completing follow-up, and analysed                                                                                                         |                      |
|                              |          | (b) Give reasons for non-participation at each stage                                                                                                                                                                                                                                                      |                      |
|                              |          | (c) Consider use of a flow diagram                                                                                                                                                                                                                                                                        |                      |
| Descriptive Data             | 14*      | (a) Give characteristics of study participants (eg demographic, clinical, social) and information on exposures and potential confounders                                                                                                                                                                  |                      |
|                              |          | (b) Indicate number of participants with missing data for each variable of interest                                                                                                                                                                                                                       |                      |
|                              |          | (c) <i>Cohort study</i> —Summarise follow-up time (eg, average and total amount)                                                                                                                                                                                                                          |                      |
| Outcome Data                 | 15*      | <i>Cohort study</i> —Report numbers of outcome events or summary measures over time                                                                                                                                                                                                                       |                      |
|                              |          | <i>Case-control study</i> —Report numbers in each exposure category, or summary measures of exposure                                                                                                                                                                                                      |                      |
|                              |          | <i>Cross-sectional study</i> —Report numbers of outcome events or summary measures                                                                                                                                                                                                                        |                      |

| Section and Item         | Item No. | Recommendation                                                                                                                                                                                               | Reported on Page No. |
|--------------------------|----------|--------------------------------------------------------------------------------------------------------------------------------------------------------------------------------------------------------------|----------------------|
| Main Results             | 16       | (a) Give unadjusted estimates and, if applicable, confounder-adjusted estimates and their precision (eg, 95% confidence interval). Make clear which confounders were adjusted for and why they were included |                      |
|                          |          | (b) Report category boundaries when continuous variables were categorized                                                                                                                                    |                      |
|                          |          | (c) If relevant, consider translating estimates of relative risk into absolute risk for a meaningful time period                                                                                             |                      |
| Other Analyses           | 17       | Report other analyses done—eg analyses of subgroups and interactions, and sensitivity analyses                                                                                                               |                      |
| <b>Discussion</b>        |          |                                                                                                                                                                                                              |                      |
| Key Results              | 18       | Summarise key results with reference to study objectives                                                                                                                                                     |                      |
| Limitations              | 19       | Discuss limitations of the study, taking into account sources of potential bias or imprecision. Discuss both direction and magnitude of any potential bias                                                   |                      |
| Interpretation           | 20       | Give a cautious overall interpretation of results considering objectives, limitations, multiplicity of analyses, results from similar studies, and other relevant evidence                                   |                      |
| Generalisability         | 21       | Discuss the generalisability (external validity) of the study results                                                                                                                                        |                      |
| <b>Other Information</b> |          |                                                                                                                                                                                                              |                      |
| Funding                  | 22       | Give the source of funding and the role of the funders for the present study and, if applicable, for the original study on which the present article is based                                                |                      |

\*Give information separately for cases and controls in case-control studies and, if applicable, for exposed and unexposed groups in cohort and cross-sectional studies.

**Once you have completed this checklist, please save a copy and upload it as part of your submission. DO NOT include this checklist as part of the main manuscript document. It must be uploaded as a separate file.**
