# Supplementary material for: Cohort study of high maternal body mass index and the risk of adverse pregnancy and delivery outcomes in Scotland
Source: PubMed Central journal article supplement (PMC7045241; doi:10.1136/bmjopen-2018-026168), 2020-02-20
Supplement: bmjopen-2018-026168supp001.pdf [file bmjopen-2018-026168supp001.pdf]

## Supplementary file 1: Description of data fields used in the study

| Variable Name       | Database Source      | Variable Description/Values                                                                                                                                                                                                                       | Notes                                                                                                                                                                                                                       |
|---------------------|----------------------|---------------------------------------------------------------------------------------------------------------------------------------------------------------------------------------------------------------------------------------------------|-----------------------------------------------------------------------------------------------------------------------------------------------------------------------------------------------------------------------------|
| Mother_ID           | N/A - study specific | Unique mother identifier                                                                                                                                                                                                                          | 1516-0613/' followed by an anonymous identifier                                                                                                                                                                             |
| Baby_ID             | N/A - study specific | Unique baby identifier                                                                                                                                                                                                                            | Mother_ID followed by delivery sequence number followed by a baby sequence number. The baby sequence number for multiple babies from same delivery not necessarily in correct order due to missing CHI numbers.             |
| Delivery_Seq_No     | N/A - study specific | Delivery sequence number of mother                                                                                                                                                                                                                |                                                                                                                                                                                                                             |
| Gest_Diabetes       | SMR02                | <b>1:</b> Yes, Gestational diabetes (diagnosed during this pregnancy)<br><b>0:</b> Yes, Pre-existing diabetes (diagnosed before pregnancy) & No (no diabetes during this pregnancy)<br><b>Missing:</b> Yes, Time of diagnosis unknown & Not Known | <a href="http://www.ndc.scot.nhs.uk/Dictionary-A-Z/Definitions/index.asp?Search=D&amp;ID=214&amp;Title=Diabetes">http://www.ndc.scot.nhs.uk/Dictionary-A-Z/Definitions/index.asp?Search=D&amp;ID=214&amp;Title=Diabetes</a> |
| Gest_Hypertension   | SMR02/SMR01          | <b>1:</b> ICD 10 code O13.X<br><b>0:</b> All other codes                                                                                                                                                                                          | Flagged codes cover gestational hypertension                                                                                                                                                                                |
| Pre_Eclampsia       | SMR02/SMR01          | <b>1:</b> ICD 10 code O14._<br><b>0:</b> All other codes                                                                                                                                                                                          | Flagged codes cover pre-eclampsia                                                                                                                                                                                           |
| Placental_Abruption | SMR02/SMR01          | <b>1:</b> ICD 10 code O45._<br><b>0:</b> All other codes                                                                                                                                                                                          | Flagged codes cover placental abruption                                                                                                                                                                                     |
| Placental_Praevia   | SMR02/SMR01          | <b>1:</b> ICD 10 code O44._<br><b>0:</b> All other codes                                                                                                                                                                                          | Flagged codes cover placenta praevia                                                                                                                                                                                        |

|                        |             |                                                                                                                                  |                                                                                                                                                                                                                                                                             |
|------------------------|-------------|----------------------------------------------------------------------------------------------------------------------------------|-----------------------------------------------------------------------------------------------------------------------------------------------------------------------------------------------------------------------------------------------------------------------------|
| Postpartum_Haemorrhage | SMR02/SMR01 | <b>1:</b> ICD 10 code O72._<br><b>0:</b> All other codes                                                                         | Flagged codes cover postpartum haemorrhage                                                                                                                                                                                                                                  |
| Caesarean_Delivery     | SMR02       | <b>1:</b> Elective (planned) caesarean section & Emergency and unspecified caesarean section<br><b>0:</b> All other codes        | <a href="http://www.ndc.scot.nhs.uk/Dictionary-A-Z/Definitions/index.asp?Search=M&amp;ID=322&amp;Title=Mode of Delivery - Babies 1 to 3">http://www.ndc.scot.nhs.uk/Dictionary-A-Z/Definitions/index.asp?Search=M&amp;ID=322&amp;Title=Mode of Delivery - Babies 1 to 3</a> |
| Labour_Induction       | SMR02       | <b>1:</b> 1-8 - Induction of labour codes<br><b>0:</b> 0, None<br><b>Missing:</b> 9, Not known                                   | <a href="http://www.ndc.scot.nhs.uk/Dictionary-A-Z/Definitions/index.asp?Search=I&amp;ID=295&amp;Title=Induction of Labour">http://www.ndc.scot.nhs.uk/Dictionary-A-Z/Definitions/index.asp?Search=I&amp;ID=295&amp;Title=Induction of Labour</a>                           |
| SGA                    | SMR02       | <b>1:</b> Birthweight ≤10th percentile<br><b>0:</b> Birthweight >10th percentile                                                 | Small for gestational age flag                                                                                                                                                                                                                                              |
| LGA                    | SMR02       | <b>1:</b> Birthweight ≥90th percentile<br><b>0:</b> Birthweight <90th percentile                                                 | Large for gestational age flag                                                                                                                                                                                                                                              |
| Preterm_Delivery       | SMR02       | <b>1:</b> Estimated gestation < 37 weeks<br><b>0:</b> Estimated gestation ≥ 37 weeks and ≤ 42 weeks<br><b>Missing:</b> otherwise | <a href="http://www.ndc.scot.nhs.uk/Dictionary-A-Z/Definitions/index.asp?Search=E&amp;ID=242&amp;Title=Estimated Gestation">http://www.ndc.scot.nhs.uk/Dictionary-A-Z/Definitions/index.asp?Search=E&amp;ID=242&amp;Title=Estimated Gestation</a>                           |
| Postterm_Delivery      | SMR02       | <b>1:</b> Estimated gestation > 42 weeks<br><b>0:</b> Estimated gestation ≥ 37 weeks and ≤ 42 weeks<br><b>Missing:</b> otherwise | <a href="http://www.ndc.scot.nhs.uk/Dictionary-A-Z/Definitions/index.asp?Search=E&amp;ID=242&amp;Title=Estimated Gestation">http://www.ndc.scot.nhs.uk/Dictionary-A-Z/Definitions/index.asp?Search=E&amp;ID=242&amp;Title=Estimated Gestation</a>                           |
| Apgar_Score            | SMR02       | <b>1:</b> Apgar score at 5 mins < 7<br><b>0:</b> Apgar score at 5 mins ≥ 7                                                       | <a href="http://www.ndc.scot.nhs.uk/Dictionary-A-Z/Definitions/index.asp?Search=A&amp;ID=88&amp;Title=Apgar Score - Babies 1 to 3">http://www.ndc.scot.nhs.uk/Dictionary-A-Z/Definitions/index.asp?Search=A&amp;ID=88&amp;Title=Apgar Score - Babies 1 to 3</a>             |
| Maternal_Obesity       | SMR02       | <b>1:</b> Obese status<br><b>0:</b> Overweight, Healthy or underweight status                                                    | Adults with BMI ≥ 30 classed as obese. BMI of girls aged 2 - 19 years old standardized using UK1990 growth reference values and z-score ≥ 6/3 (98th centile) classed as obese.                                                                                              |

|                             |            |                                                                                 |                                                                                                                                                                                                                                                                                   |
|-----------------------------|------------|---------------------------------------------------------------------------------|-----------------------------------------------------------------------------------------------------------------------------------------------------------------------------------------------------------------------------------------------------------------------------------|
| Maternal_Overweight_Obesity | SMR02      | <b>1:</b> Overweight or Obese status<br><b>0:</b> Healthy or underweight status | Adults with BMI $\geq 25$ classed as overweight or obese. BMI of girls aged 2 - 19 years old standardized using UK1990 growth reference values and z-score $\geq 4/3$ (91st centile) classed as overweight or obese.                                                              |
| Age                         | SMR02      | Age of mother at delivery (in years)                                            |                                                                                                                                                                                                                                                                                   |
| Parity                      | SMR02      | Total number of previous pregnancies                                            | <a href="http://www.ndc.scot.nhs.uk/Dictionary-A-Z/Definitions/index.asp?Search=P&amp;ID=409&amp;Title=Previous%20Pregnancies">http://www.ndc.scot.nhs.uk/Dictionary-A-Z/Definitions/index.asp?Search=P&amp;ID=409&amp;Title=Previous Pregnancies</a>                             |
| Deprivation                 | SMR02      | Carstairs 2001 quintiles for Scotland                                           | 1=least deprived; 5=most deprived                                                                                                                                                                                                                                                 |
| Smoking_Status              | SMR02      | <b>1:</b> Yes<br><b>0:</b> No<br><b>Missing:</b> Not known                      | <a href="http://www.ndc.scot.nhs.uk/Dictionary-A-Z/Definitions/index.asp?Search=S&amp;ID=456&amp;Title=Smoker%20During%20Pregnancy">http://www.ndc.scot.nhs.uk/Dictionary-A-Z/Definitions/index.asp?Search=S&amp;ID=456&amp;Title=Smoker During Pregnancy</a>                     |
| Multiple_births             | SMR02      | <b>1:</b> More than one birth this pregnancy<br><b>0:</b> Single birth          | <a href="http://www.ndc.scot.nhs.uk/Dictionary-A-Z/Definitions/index.asp?Search=N&amp;ID=349&amp;Title=Number%20of%20Births%20this%20Pregnancy">http://www.ndc.scot.nhs.uk/Dictionary-A-Z/Definitions/index.asp?Search=N&amp;ID=349&amp;Title=Number of Births this Pregnancy</a> |
| Multiple_births_in_NRS      | NRS Births | <b>1:</b> Multiple babies found for this mother's delivery in NRS Births        | Multiple babies recorded in NRS Births but only a single baby recorded in SMR02                                                                                                                                                                                                   |
| Previous_Caesarean_section  | SMR02      | <b>1:</b> More than zero<br><b>0:</b> Zero                                      | <a href="http://www.ndc.scot.nhs.uk/Dictionary-A-Z/Definitions/index.asp?Search=P&amp;ID=406&amp;Title=Previous%20Caesarean%20Sections">http://www.ndc.scot.nhs.uk/Dictionary-A-Z/Definitions/index.asp?Search=P&amp;ID=406&amp;Title=Previous Caesarean Sections</a>             |
