# Supplementary material for: Cohort study of high maternal body mass index and the risk of adverse pregnancy and delivery outcomes in Scotland
Source: PubMed Central journal article supplement (PMC7045241; doi:10.1136/bmjopen-2018-026168), 2020-02-20

## Supplementary file 2. Study flow diagram

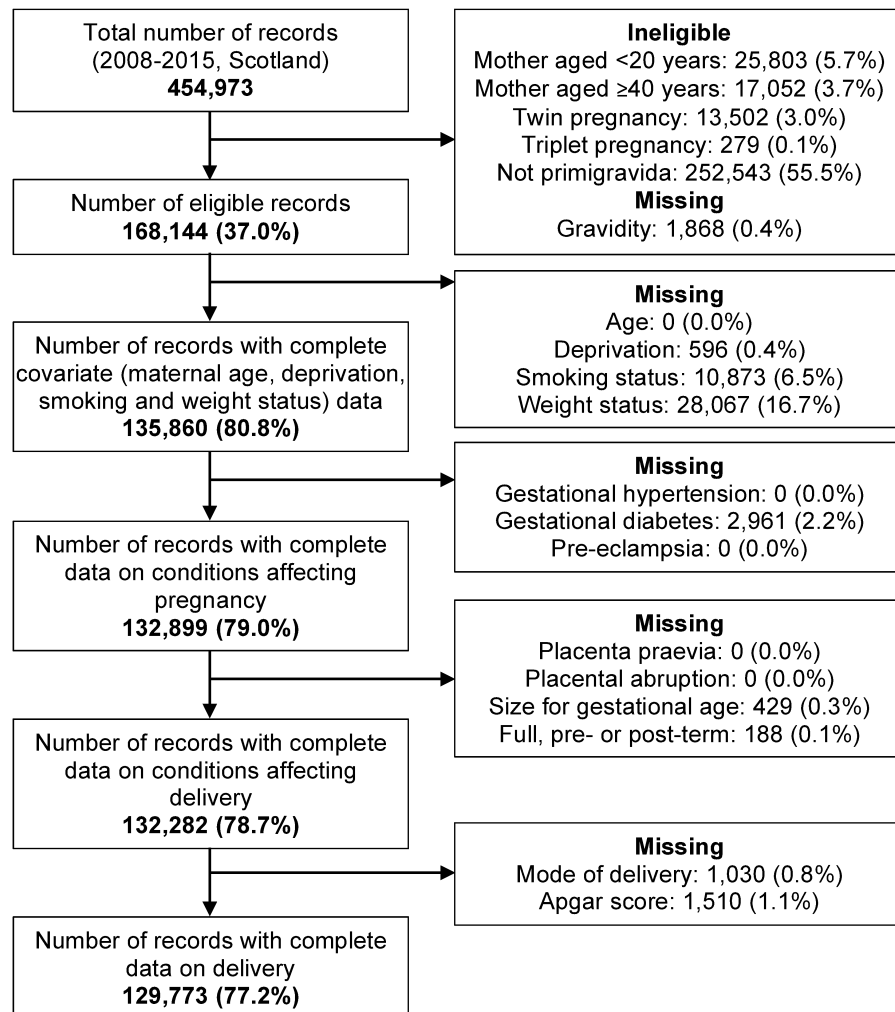

Supplement: bmjopen-2018-026168supp002.pdf [file bmjopen-2018-026168supp002.pdf]
